# Supplementary material for: Traffic Noise and Mental Health: A Systematic Review and Meta-Analysis
Source: PubMed Central journal article supplement (PMC7503511; doi:10.3390/ijerph17176175), 2020-08-25
Supplement: ijerph-17-06175-s001.pdf [file ijerph-17-06175-s001.pdf]

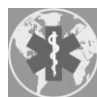

## 1. Data Extraction

Table 1. Data Extraction.

| Reference<br>(First author, publication year, S/N)<br>Meta-analysis | Study design                     | Population                                                                                                                                                                                                                                       | Outcome                                                                                                                                     | Exposure                                                                                      |                     |                    | Results                                                                                                                                                                                                                                                                                                                                                     | Comments<br>(study quality [overall assessment according to SIGN/CASP], conflict of interest [stated vs. not stated], funding [financed from public funds vs. financed from industry], confounding, strengths / weaknesses [potential bias, over- or underestimation of potential effects]) |  |  |  |    |   |    |        |      |       |  |  |      |     |      |           |                                                                                                                                                                                       |
|---------------------------------------------------------------------|----------------------------------|--------------------------------------------------------------------------------------------------------------------------------------------------------------------------------------------------------------------------------------------------|---------------------------------------------------------------------------------------------------------------------------------------------|-----------------------------------------------------------------------------------------------|---------------------|--------------------|-------------------------------------------------------------------------------------------------------------------------------------------------------------------------------------------------------------------------------------------------------------------------------------------------------------------------------------------------------------|---------------------------------------------------------------------------------------------------------------------------------------------------------------------------------------------------------------------------------------------------------------------------------------------|--|--|--|----|---|----|--------|------|-------|--|--|------|-----|------|-----------|---------------------------------------------------------------------------------------------------------------------------------------------------------------------------------------|
|                                                                     |                                  | Study region<br>Sample population<br>Sample size (M, F, M+F):<br>Age (mean, range)<br>No. of cases / no. of controls or exposed/unexposed<br>Time of recruitment / follow-up (mean, range)<br>Response (%)<br>(baseline minus loss to follow-up) | Disease (ICD-10)<br>Prescription<br>Questionnaire                                                                                           | exposure source                                                                               | exposure assessment | exposure levels    |                                                                                                                                                                                                                                                                                                                                                             |                                                                                                                                                                                                                                                                                             |  |  |  |    |   |    |        |      |       |  |  |      |     |      |           |                                                                                                                                                                                       |
| Andersson, 2018, 8552                                               | Cohort study<br>(Betula project) | Study region:<br>Umeå municipality, Northern Sweden<br><br>Sample size:<br>M+F=1,721<br>M= 985, F= 736<br><br>Random selection of participants<br><br>Sample population:                                                                         | Dementia diagnosed through 3-phase procedure: 1. Health examination with neuropsychological testing, structured interviews and observations | Road traffic noise<br><br>Data from 2012<br><br>Assessment of NO <sub>x</sub> (for 2009-2010) | L <sub>eq,24h</sub> | < 55 dB<br>≥ 55 dB | <table border="1"> <thead> <tr> <th colspan="4">Table 2: HR (Model 3)</th> </tr> <tr> <th>dB</th> <th>N</th> <th>HR</th> <th>95% CI</th> </tr> </thead> <tbody> <tr> <td>&lt; 55</td> <td>1,619</td> <td></td> <td></td> </tr> <tr> <td>≥ 55</td> <td>102</td> <td>0.95</td> <td>0.57-1.57</td> </tr> </tbody> </table><br>(not adjusted for air pollution) | Table 2: HR (Model 3)                                                                                                                                                                                                                                                                       |  |  |  | dB | N | HR | 95% CI | < 55 | 1,619 |  |  | ≥ 55 | 102 | 0.95 | 0.57-1.57 | study quality:<br>-<br>Cohort study<br>conflict of interest:<br>stated (none declared)<br>funding:<br>stated: Swedish Research Council Formas, Stockholm, Sweden [registration number |
| Table 2: HR (Model 3)                                               |                                  |                                                                                                                                                                                                                                                  |                                                                                                                                             |                                                                                               |                     |                    |                                                                                                                                                                                                                                                                                                                                                             |                                                                                                                                                                                                                                                                                             |  |  |  |    |   |    |        |      |       |  |  |      |     |      |           |                                                                                                                                                                                       |
| dB                                                                  | N                                | HR                                                                                                                                                                                                                                               | 95% CI                                                                                                                                      |                                                                                               |                     |                    |                                                                                                                                                                                                                                                                                                                                                             |                                                                                                                                                                                                                                                                                             |  |  |  |    |   |    |        |      |       |  |  |      |     |      |           |                                                                                                                                                                                       |
| < 55                                                                | 1,619                            |                                                                                                                                                                                                                                                  |                                                                                                                                             |                                                                                               |                     |                    |                                                                                                                                                                                                                                                                                                                                                             |                                                                                                                                                                                                                                                                                             |  |  |  |    |   |    |        |      |       |  |  |      |     |      |           |                                                                                                                                                                                       |
| ≥ 55                                                                | 102                              | 0.95                                                                                                                                                                                                                                             | 0.57-1.57                                                                                                                                   |                                                                                               |                     |                    |                                                                                                                                                                                                                                                                                                                                                             |                                                                                                                                                                                                                                                                                             |  |  |  |    |   |    |        |      |       |  |  |      |     |      |           |                                                                                                                                                                                       |

| Referen<br>ce<br>(First<br>author,<br>publica<br>tion<br>year,<br>S/N)<br>Meta-a<br>nalysis | Study<br>desig<br>n | Population                                                                                                                                                                                                                                                                                               | Outcome                                                                                                                                                                                                                                                                        | Exposure           |                        |                    | Results                                                                                                                                                                                                                                                                                                      | Comments<br>(study quality<br>[overall assessment<br>according to<br>SIGN/CASP],<br>conflict of interest<br>[stated vs. not stated],<br>funding [financed<br>from public funds vs.<br>financed from<br>industry],<br>confounding,<br>strengths /<br>weaknesses<br>[potential bias, over-<br>or underestimation of<br>potential effects]) |
|---------------------------------------------------------------------------------------------|---------------------|----------------------------------------------------------------------------------------------------------------------------------------------------------------------------------------------------------------------------------------------------------------------------------------------------------|--------------------------------------------------------------------------------------------------------------------------------------------------------------------------------------------------------------------------------------------------------------------------------|--------------------|------------------------|--------------------|--------------------------------------------------------------------------------------------------------------------------------------------------------------------------------------------------------------------------------------------------------------------------------------------------------------|------------------------------------------------------------------------------------------------------------------------------------------------------------------------------------------------------------------------------------------------------------------------------------------------------------------------------------------|
|                                                                                             |                     | Study region<br>Sample population<br>Sample size (M, F, M+F):<br>Age (mean, range)<br>No. of cases / no. of controls<br>or exposed/unexposed<br>Time of recruitment /<br>follow-up (mean, range)<br>Response (%)<br>(baseline minus loss to<br>follow-up)                                                | Disease (ICD-10)<br>Prescription<br>Questionnaire                                                                                                                                                                                                                              | exposure<br>source | exposure<br>assessment | exposure<br>levels |                                                                                                                                                                                                                                                                                                              |                                                                                                                                                                                                                                                                                                                                          |
|                                                                                             |                     | Inclusion criteria: ≥ 55 years at<br>baseline,<br>Exclusion criteria: any<br>subtype of dementia that was<br>not vascular dementia or<br>Alzheimer’s disease, dead,<br>lost to follow-up<br><br>Age:<br>Mean 68.5 ± 9.4 years (55-85<br>years)<br><br>Time of recruitment:<br>1993-2010<br><br>Response: | 2. in case of a<br>suspected case of<br>dementia→<br>examination by<br>specialist in<br>geriatric<br>medicine or<br>geriatric<br>psychiatry,<br>careful review of<br>each individual’s<br>medical record<br><br>3. specialist in<br>geriatric<br>psychiatry or in<br>geriatric |                    |                        |                    | 942-2015-1099]<br>confounding<br>(controlled for):<br>baseline age,<br>education, physical<br>activity, smoking,<br>sex, body mass index,<br>waist-hip ratio,<br>alcohol, ApoE4,<br>baseline medical<br>history of diabetes,<br>hypertension, and<br>stroke.<br>strengths,<br>weaknesses:<br>- Exposure data |                                                                                                                                                                                                                                                                                                                                          |

| Referen<br>ce<br>(First<br>author,<br>publica<br>tion<br>year,<br>S/N)<br>Meta-a<br>nalysis | Study<br>desig<br>n | Population                                                                                                                                                                                                                                                | Outcome                                            | Exposure           |                        |                    | Results | Comments<br>(study quality<br>[overall assessment<br>according to<br>SIGN/CASP],<br>conflict of interest<br>[stated vs. not stated],<br>funding [financed<br>from public funds vs.<br>financed from<br>industry],<br>confounding,<br>strengths /<br>weaknesses<br>[potential bias, over-<br>or underestimation of<br>potential effects]) |
|---------------------------------------------------------------------------------------------|---------------------|-----------------------------------------------------------------------------------------------------------------------------------------------------------------------------------------------------------------------------------------------------------|----------------------------------------------------|--------------------|------------------------|--------------------|---------|------------------------------------------------------------------------------------------------------------------------------------------------------------------------------------------------------------------------------------------------------------------------------------------------------------------------------------------|
|                                                                                             |                     | Study region<br>Sample population<br>Sample size (M, F, M+F):<br>Age (mean, range)<br>No. of cases / no. of controls<br>or exposed/unexposed<br>Time of recruitment /<br>follow-up (mean, range)<br>Response (%)<br>(baseline minus loss to<br>follow-up) | Disease (ICD-10)<br>Prescription<br>Questionnaire  | exposure<br>source | exposure<br>assessment | exposure<br>levels |         |                                                                                                                                                                                                                                                                                                                                          |
|                                                                                             |                     | Not reported (also checked<br>Oudin et al. 2016, Boraxberkk<br>et al. 2015)                                                                                                                                                                               | medicine made<br>last decision of<br>the diagnosis |                    |                        |                    |         | collected after<br>outcome (chronology)<br>- No information on<br>response<br>- Exclusion of lost<br>follow-up<br>- No adjustment of air<br>pollution<br>+cohort study-><br>hazard ratios<br>+ random selection of<br>participants<br>+ adequate definition<br>and assessment of<br>outcome<br>+adequate control for                     |

| Reference<br>(First author, publication year, S/N)<br>Meta-analysis | Study design    | Population                                                                                                                                                                                                                                       | Outcome                                                            | Exposure        |                                                                                                   |                                    | Results                                                                                                                                                                    | Comments<br>(study quality [overall assessment according to SIGN/CASP], conflict of interest [stated vs. not stated], funding [financed from public funds vs. financed from industry], confounding, strengths / weaknesses [potential bias, over- or underestimation of potential effects]) |
|---------------------------------------------------------------------|-----------------|--------------------------------------------------------------------------------------------------------------------------------------------------------------------------------------------------------------------------------------------------|--------------------------------------------------------------------|-----------------|---------------------------------------------------------------------------------------------------|------------------------------------|----------------------------------------------------------------------------------------------------------------------------------------------------------------------------|---------------------------------------------------------------------------------------------------------------------------------------------------------------------------------------------------------------------------------------------------------------------------------------------|
|                                                                     |                 | Study region<br>Sample population<br>Sample size (M, F, M+F):<br>Age (mean, range)<br>No. of cases / no. of controls or exposed/unexposed<br>Time of recruitment / follow-up (mean, range)<br>Response (%)<br>(baseline minus loss to follow-up) | Disease (ICD-10)<br>Prescription<br>Questionnaire                  | exposure source | exposure assessment                                                                               | exposure levels                    |                                                                                                                                                                            |                                                                                                                                                                                                                                                                                             |
| Baudin, C.2018, 8456                                                | Cross-sectional | Study region<br>Population >18 living Around 3 airports in France (Paris-Charles de Gaulle, Lyon-Saint-Exupery and Toulouse-Blagnac)<br><br>Sample size (participated)                                                                           | Face-to-face interview at home<br>Psychological ill health: GHQ-12 | Aircraft        | L <sub>DEN</sub><br>L <sub>eq,24h</sub><br>L <sub>eq,16h</sub> (6-22h)<br>L <sub>N</sub> (22-06h) | <40,<br>50-54,<br>55-59,<br>≥60 dB | Per 10 dB increase<br>L <sub>DEN</sub> : OR = 1.02 (0.78-1.34)<br><br>L <sub>DEN</sub> : OR = 0.93 (0.69-1.24) – additionally adjusted for noise sensitivity and annoyance | study quality: -(to+)<br>Cross-sectional study design<br>conflict of interest: stated<br>funding: stated                                                                                                                                                                                    |

| Referen<br>ce<br>(First<br>author,<br>publica<br>tion<br>year,<br>S/N)<br>Meta-a<br>nalysis | Study<br>desig<br>n | Population                                                                                                                                                                                                                                                | Outcome                                           | Exposure           |                        |                    | Results                                                                     | Comments<br>(study quality<br>[overall assessment<br>according to<br>SIGN/CASP],<br>conflict of interest<br>[stated vs. not stated],<br>funding [financed<br>from public funds vs.<br>financed from<br>industry],<br>confounding,<br>strengths /<br>weaknesses<br>[potential bias, over-<br>or underestimation of<br>potential effects])             |
|---------------------------------------------------------------------------------------------|---------------------|-----------------------------------------------------------------------------------------------------------------------------------------------------------------------------------------------------------------------------------------------------------|---------------------------------------------------|--------------------|------------------------|--------------------|-----------------------------------------------------------------------------|------------------------------------------------------------------------------------------------------------------------------------------------------------------------------------------------------------------------------------------------------------------------------------------------------------------------------------------------------|
|                                                                                             |                     | Study region<br>Sample population<br>Sample size (M, F, M+F):<br>Age (mean, range)<br>No. of cases / no. of controls<br>or exposed/unexposed<br>Time of recruitment /<br>follow-up (mean, range)<br>Response (%)<br>(baseline minus loss to<br>follow-up) | Disease (ICD-10)<br>Prescription<br>Questionnaire | exposure<br>source | exposure<br>assessment | exposure<br>levels |                                                                             |                                                                                                                                                                                                                                                                                                                                                      |
|                                                                                             |                     | M = 549, F = 695<br>M+F 1,244<br><br>Age<br>18-34y: 226<br>35-44y: 236<br>45-54y: 266<br>55-64y: 260<br>65-74y: 185<br>≥ 75y: 71<br>Sample size (analyzed)<br>M = 534, F = 688<br>M+F 1,222<br><br>Time of recruitment<br>2013                            |                                                   |                    |                        |                    | (only results for L <sub>DEN</sub> presented -><br>reason: similar results) | confounding<br>(controlled for): sex,<br>age, country of birth,<br>occupational activity,<br>education, marital<br>status, smoking,<br>alcohol consumption,<br>number of<br>work-related stress<br>and major stressful<br>life events, monthly<br>household income,<br>sleep duration,<br>antidepressant use,<br>self-reported anxiety<br>strengths, |

| Referen<br>ce<br>(First<br>author,<br>publica<br>tion<br>year,<br>S/N)<br>Meta-a<br>nalysis | Study<br>desig<br>n | Population                                                                                                                                                                                                                                                                                                          | Outcome                                           | Exposure           |                        |                    | Results                                                                                                                                                                                                                                                                                                                                                                         | Comments<br>(study quality<br>[overall assessment<br>according to<br>SIGN/CASP],<br>conflict of interest<br>[stated vs. not stated],<br>funding [financed<br>from public funds vs.<br>financed from<br>industry],<br>confounding,<br>strengths /<br>weaknesses<br>[potential bias, over-<br>or underestimation of<br>potential effects]) |
|---------------------------------------------------------------------------------------------|---------------------|---------------------------------------------------------------------------------------------------------------------------------------------------------------------------------------------------------------------------------------------------------------------------------------------------------------------|---------------------------------------------------|--------------------|------------------------|--------------------|---------------------------------------------------------------------------------------------------------------------------------------------------------------------------------------------------------------------------------------------------------------------------------------------------------------------------------------------------------------------------------|------------------------------------------------------------------------------------------------------------------------------------------------------------------------------------------------------------------------------------------------------------------------------------------------------------------------------------------|
|                                                                                             |                     | Study region<br>Sample population<br>Sample size (M, F, M+F):<br>Age (mean, range)<br>No. of cases / no. of controls<br>or exposed/unexposed<br>Time of recruitment /<br>follow-up (mean, range)<br>Response (%)<br>(baseline minus loss to<br>follow-up)                                                           | Disease (ICD-10)<br>Prescription<br>Questionnaire | exposure<br>source | exposure<br>assessment | exposure<br>levels |                                                                                                                                                                                                                                                                                                                                                                                 |                                                                                                                                                                                                                                                                                                                                          |
|                                                                                             |                     | <p>Response rate (%)<br/>30% (N=4,202, responders: n =<br/>1,244)</p> <p>40% of non-participants<br/>answered a short<br/>questionnaire<br/>-&gt; Characteristics of<br/>participants and<br/>non-participants presented<br/>descriptively.-&gt; slight<br/>differences in marital status,<br/>socio-occupation</p> |                                                   |                    |                        |                    | <p>weaknesses:<br/>-Cross-sectional<br/>study, no information<br/>about time of<br/>exposure assessment<br/>- response only 30%<br/>+ random selection of<br/>households from a<br/>phone directory, then<br/>random selection of a<br/>respondent within the<br/>household<br/>+ Non-responder<br/>analysis (but slight<br/>differences in regard<br/>to marital status or</p> |                                                                                                                                                                                                                                                                                                                                          |

| Reference<br>(First author, publication year, S/N)<br>Meta-analysis | Population   |                                                                                                                                                                                                                                                  | Outcome                                           | Exposure        |                     |                 | Results | Comments<br>(study quality [overall assessment according to SIGN/CASP], conflict of interest [stated vs. not stated], funding [financed from public funds vs. financed from industry], confounding, strengths / weaknesses [potential bias, over- or underestimation of potential effects]) |
|---------------------------------------------------------------------|--------------|--------------------------------------------------------------------------------------------------------------------------------------------------------------------------------------------------------------------------------------------------|---------------------------------------------------|-----------------|---------------------|-----------------|---------|---------------------------------------------------------------------------------------------------------------------------------------------------------------------------------------------------------------------------------------------------------------------------------------------|
|                                                                     | Study design | Study region<br>Sample population<br>Sample size (M, F, M+F):<br>Age (mean, range)<br>No. of cases / no. of controls or exposed/unexposed<br>Time of recruitment / follow-up (mean, range)<br>Response (%)<br>(baseline minus loss to follow-up) | Disease (ICD-10)<br>Prescription<br>Questionnaire | exposure source | exposure assessment | exposure levels |         |                                                                                                                                                                                                                                                                                             |
|                                                                     |              |                                                                                                                                                                                                                                                  |                                                   |                 |                     |                 |         | occupation)<br>+ adequate definition and assessment of outcome<br>+ adequate exposure assessment<br>+ high statistical power<br>adequate control for confounders<br>(sensitivity analyses adjusting for noise sensitivity and annoyance)<br>+ ethics approval by 2 national authorities in  |

| Reference<br>(First author, publication year, S/N)<br>Meta-analysis | Study design                   | Population                                                                                                                                                                                                                                       | Outcome                                                                                            | Exposure        |                                                                                     |                                                             | Results                                                                                                                                         |  |  | Comments<br>(study quality [overall assessment according to SIGN/CASP], conflict of interest [stated vs. not stated], funding [financed from public funds vs. financed from industry], confounding, strengths / weaknesses [potential bias, over- or underestimation of potential effects]) |
|---------------------------------------------------------------------|--------------------------------|--------------------------------------------------------------------------------------------------------------------------------------------------------------------------------------------------------------------------------------------------|----------------------------------------------------------------------------------------------------|-----------------|-------------------------------------------------------------------------------------|-------------------------------------------------------------|-------------------------------------------------------------------------------------------------------------------------------------------------|--|--|---------------------------------------------------------------------------------------------------------------------------------------------------------------------------------------------------------------------------------------------------------------------------------------------|
|                                                                     |                                | Study region<br>Sample population<br>Sample size (M, F, M+F):<br>Age (mean, range)<br>No. of cases / no. of controls or exposed/unexposed<br>Time of recruitment / follow-up (mean, range)<br>Response (%)<br>(baseline minus loss to follow-up) | Disease (ICD-10)<br>Prescription<br>Questionnaire                                                  | exposure source | exposure assessment                                                                 | exposure levels                                             |                                                                                                                                                 |  |  |                                                                                                                                                                                                                                                                                             |
| Bocquier, A. 2014, 300, France Yes                                  | Retro prospective cohort study | Study region: Marseilles, France<br><br>Sample size: M+F=190,617<br>M= 87,975, F=102,642<br><br>Sample population:                                                                                                                               | Prescriptions total number of purchases of anxiolytics–hypnotics (N05B-Anxiolytics, N05CD-Benzodia | Road traffic    | LN (22-06h)<br><br>Environmental Noise Directive (END) 2002/49/EC, using the CadnaA | LN<br><br>< 45dB (Ref)<br>45-50 dB,<br>50-55 dB,<br>≥ 55 dB | Anxiolytic-hypnotic purchase in 2008-9 (from Table 3)<br><br>Low deprivation (n=41,054)<br><br>LN RR (95%CI)<br>Ref 16,289<br>45-50 0.96 15,267 |  |  | study quality: - (to +)<br><br>conflict of interest: not stated<br><br>funding: Agence                                                                                                                                                                                                      |



| Referen<br>ce<br>(First<br>author,<br>publica<br>tion<br>year,<br>S/N)<br>Meta-a<br>nalysis | Study<br>desig<br>n | Population                                                                                                                                                                                                                                                          | Outcome                                                              | Exposure                                                                    |                                                                                                       |                                                                                                                                                         | Results                                                        | Comments<br>(study quality<br>[overall assessment<br>according to<br>SIGN/CASP],<br>conflict of interest<br>[stated vs. not stated],<br>funding [financed<br>from public funds vs.<br>financed from<br>industry],<br>confounding,<br>strengths /<br>weaknesses<br>[potential bias, over-<br>or underestimation of<br>potential effects]) |
|---------------------------------------------------------------------------------------------|---------------------|---------------------------------------------------------------------------------------------------------------------------------------------------------------------------------------------------------------------------------------------------------------------|----------------------------------------------------------------------|-----------------------------------------------------------------------------|-------------------------------------------------------------------------------------------------------|---------------------------------------------------------------------------------------------------------------------------------------------------------|----------------------------------------------------------------|------------------------------------------------------------------------------------------------------------------------------------------------------------------------------------------------------------------------------------------------------------------------------------------------------------------------------------------|
|                                                                                             |                     | Study region<br>Sample population<br>Sample size (M, F, M+F):<br>Age (mean, range)<br>No. of cases / no. of controls<br>or exposed/unexposed<br>Time of recruitment /<br>follow-up (mean, range)<br>Response (%)<br>(baseline minus loss to<br>follow-up)           | Disease (ICD-10)<br>Prescription<br>Questionnaire                    | exposure<br>source                                                          | exposure<br>assessment                                                                                | exposure<br>levels                                                                                                                                      |                                                                |                                                                                                                                                                                                                                                                                                                                          |
|                                                                                             |                     | Those registered at French<br>National Health Insurance<br>Fund in SE France<br><br>Age:<br>41.5 years (SD 12.5)<br><br>No of cases/ no of controls:<br>See results<br><br>Time of recruitment/<br>follow-up: 2008-9<br><br>Response:<br>47% baseline participation | zepine derivatives<br>and N05CF-<br>Benzodiazepine<br>related drugs) | environmental<br>noise<br>prediction<br>model<br><br>Measurement<br>in 2006 | 50-55<br><br>≥ 55<br><br>Intermediate deprivation (n=102,284)<br>LN<br>(dB)<br>45-50<br>50-55<br>≥ 55 | (0.91-1.01)<br>1.04<br>(0.97-1.11)<br>1.16<br>(1.01-1.32)<br><br>RR (95%CI)<br>Ref<br>1.02<br>(0.97-1.07)<br>0.99<br>(0.94-1.03)<br>0.96<br>(0.91-1.02) | 8,075<br><br>1,423<br><br>17,074<br>31,800<br>40,013<br>13,397 | de l'environnement et<br>de la maîtrise de<br>l'énergie (Ademe) +<br>Groupement d'intérêt<br>scientifique Institut de<br>recherche en santé<br>publique (GIS-IRESP)<br>(French Environment<br>& Energy<br>Management Agency<br>+ Institute for Public<br>Health Research)<br><br>confounding<br>(adjusted for):<br>age, gender, chronic  |

| Reference<br>(First author, publication year, S/N)<br>Meta-analysis | Study design        | Population                                                                                                                                                                                                                                       | Outcome                                           | Exposure        |                     |                 | Results                                                                                                                                                                                                                                                                                                                                                                                                                                                                                                                                                   | Comments<br>(study quality [overall assessment according to SIGN/CASP], conflict of interest [stated vs. not stated], funding [financed from public funds vs. financed from industry], confounding, strengths / weaknesses [potential bias, over- or underestimation of potential effects]) |          |   |      |     |       |       |                     |        |       |                     |        |       |                     |      |                                                                                                                                                                                                                                                                                                      |
|---------------------------------------------------------------------|---------------------|--------------------------------------------------------------------------------------------------------------------------------------------------------------------------------------------------------------------------------------------------|---------------------------------------------------|-----------------|---------------------|-----------------|-----------------------------------------------------------------------------------------------------------------------------------------------------------------------------------------------------------------------------------------------------------------------------------------------------------------------------------------------------------------------------------------------------------------------------------------------------------------------------------------------------------------------------------------------------------|---------------------------------------------------------------------------------------------------------------------------------------------------------------------------------------------------------------------------------------------------------------------------------------------|----------|---|------|-----|-------|-------|---------------------|--------|-------|---------------------|--------|-------|---------------------|------|------------------------------------------------------------------------------------------------------------------------------------------------------------------------------------------------------------------------------------------------------------------------------------------------------|
|                                                                     |                     | Study region<br>Sample population<br>Sample size (M, F, M+F):<br>Age (mean, range)<br>No. of cases / no. of controls or exposed/unexposed<br>Time of recruitment / follow-up (mean, range)<br>Response (%)<br>(baseline minus loss to follow-up) | Disease (ICD-10)<br>Prescription<br>Questionnaire | exposure source | exposure assessment | exposure levels |                                                                                                                                                                                                                                                                                                                                                                                                                                                                                                                                                           |                                                                                                                                                                                                                                                                                             |          |   |      |     |       |       |                     |        |       |                     |        |       |                     |      |                                                                                                                                                                                                                                                                                                      |
|                                                                     |                     |                                                                                                                                                                                                                                                  |                                                   |                 |                     |                 | <p>High deprivation (n=47.279)</p> <table border="1"> <thead> <tr> <th>L<sub>N</sub> (dB)</th> <th>RR 95%CI</th> <th>n</th> </tr> </thead> <tbody> <tr> <td>&lt; 45</td> <td>Ref</td> <td>7,342</td> </tr> <tr> <td>45-50</td> <td>1.00<br/>(0.93-1.08)</td> <td>13,190</td> </tr> <tr> <td>50-55</td> <td>1.02<br/>(0.94-1.10)</td> <td>19,015</td> </tr> <tr> <td>≥ 55d</td> <td>0.95<br/>(0.86-1.04)</td> <td>7732</td> </tr> </tbody> </table> <p>Deprivation index was calculated by 17 questions concerning socio-economic state (census block)</p> | L <sub>N</sub> (dB)                                                                                                                                                                                                                                                                         | RR 95%CI | n | < 45 | Ref | 7,342 | 45-50 | 1.00<br>(0.93-1.08) | 13,190 | 50-55 | 1.02<br>(0.94-1.10) | 19,015 | ≥ 55d | 0.95<br>(0.86-1.04) | 7732 | <p>somatic disease, severe psychiatric disorder, CMUC coverage as a proxy for low income, number of consultations in 2008–9 with GPs, characteristics of the linked physicians and their clientele, density of GPs and of psychiatrists, and number of complaints filed for noise problems other</p> |
| L <sub>N</sub> (dB)                                                 | RR 95%CI            | n                                                                                                                                                                                                                                                |                                                   |                 |                     |                 |                                                                                                                                                                                                                                                                                                                                                                                                                                                                                                                                                           |                                                                                                                                                                                                                                                                                             |          |   |      |     |       |       |                     |        |       |                     |        |       |                     |      |                                                                                                                                                                                                                                                                                                      |
| < 45                                                                | Ref                 | 7,342                                                                                                                                                                                                                                            |                                                   |                 |                     |                 |                                                                                                                                                                                                                                                                                                                                                                                                                                                                                                                                                           |                                                                                                                                                                                                                                                                                             |          |   |      |     |       |       |                     |        |       |                     |        |       |                     |      |                                                                                                                                                                                                                                                                                                      |
| 45-50                                                               | 1.00<br>(0.93-1.08) | 13,190                                                                                                                                                                                                                                           |                                                   |                 |                     |                 |                                                                                                                                                                                                                                                                                                                                                                                                                                                                                                                                                           |                                                                                                                                                                                                                                                                                             |          |   |      |     |       |       |                     |        |       |                     |        |       |                     |      |                                                                                                                                                                                                                                                                                                      |
| 50-55                                                               | 1.02<br>(0.94-1.10) | 19,015                                                                                                                                                                                                                                           |                                                   |                 |                     |                 |                                                                                                                                                                                                                                                                                                                                                                                                                                                                                                                                                           |                                                                                                                                                                                                                                                                                             |          |   |      |     |       |       |                     |        |       |                     |        |       |                     |      |                                                                                                                                                                                                                                                                                                      |
| ≥ 55d                                                               | 0.95<br>(0.86-1.04) | 7732                                                                                                                                                                                                                                             |                                                   |                 |                     |                 |                                                                                                                                                                                                                                                                                                                                                                                                                                                                                                                                                           |                                                                                                                                                                                                                                                                                             |          |   |      |     |       |       |                     |        |       |                     |        |       |                     |      |                                                                                                                                                                                                                                                                                                      |

| Reference<br>(First author, publication year, S/N)<br>Meta-analysis | Population   |                                                                                                                                                                                                                                                  | Outcome                                           | Exposure        |                     |                 | Results | Comments<br>(study quality [overall assessment according to SIGN/CASP], conflict of interest [stated vs. not stated], funding [financed from public funds vs. financed from industry], confounding, strengths / weaknesses [potential bias, over- or underestimation of potential effects]) |
|---------------------------------------------------------------------|--------------|--------------------------------------------------------------------------------------------------------------------------------------------------------------------------------------------------------------------------------------------------|---------------------------------------------------|-----------------|---------------------|-----------------|---------|---------------------------------------------------------------------------------------------------------------------------------------------------------------------------------------------------------------------------------------------------------------------------------------------|
|                                                                     | Study design | Study region<br>Sample population<br>Sample size (M, F, M+F):<br>Age (mean, range)<br>No. of cases / no. of controls or exposed/unexposed<br>Time of recruitment / follow-up (mean, range)<br>Response (%)<br>(baseline minus loss to follow-up) | Disease (ICD-10)<br>Prescription<br>Questionnaire | exposure source | exposure assessment | exposure levels |         |                                                                                                                                                                                                                                                                                             |
|                                                                     |              |                                                                                                                                                                                                                                                  |                                                   |                 |                     |                 |         | than traffic noise in each individual's census block<br><br>strengths/ weaknesses:<br>+ cohort<br>+ adequate exposure assessment<br>+ high number of cases & controls<br>+ objective measurement (prescriptions)<br>+ 47% baseline participation (53%)                                      |

| Reference<br>(First author, publication year, S/N)<br>Meta-analysis | Population   |                                                                                                                                                                                                                                                  | Outcome                                           | Exposure        |                     |                 | Results | Comments<br>(study quality [overall assessment according to SIGN/CASP], conflict of interest [stated vs. not stated], funding [financed from public funds vs. financed from industry], confounding, strengths / weaknesses [potential bias, over- or underestimation of potential effects]) |
|---------------------------------------------------------------------|--------------|--------------------------------------------------------------------------------------------------------------------------------------------------------------------------------------------------------------------------------------------------|---------------------------------------------------|-----------------|---------------------|-----------------|---------|---------------------------------------------------------------------------------------------------------------------------------------------------------------------------------------------------------------------------------------------------------------------------------------------|
|                                                                     | Study design | Study region<br>Sample population<br>Sample size (M, F, M+F):<br>Age (mean, range)<br>No. of cases / no. of controls or exposed/unexposed<br>Time of recruitment / follow-up (mean, range)<br>Response (%)<br>(baseline minus loss to follow-up) | Disease (ICD-10)<br>Prescription<br>Questionnaire | exposure source | exposure assessment | exposure levels |         |                                                                                                                                                                                                                                                                                             |
|                                                                     |              |                                                                                                                                                                                                                                                  |                                                   |                 |                     |                 |         | could not be geo-located), low lost-to-follow-up might be expected (although not measureable)<br>- limited differentiation between incident and prevalent cases<br>- outcome medication does not allow for separation of anxiolytics and hypnotics<br>- potential over                      |

| Reference<br>(First author, publication year, S/N)<br>Meta-analysis | Study design               | Population                                                                                                                                                                                                                                       | Outcome                                                                                                      | Exposure                                    |                                                             |                 | Results                                                                                                                                       | Comments<br>(study quality [overall assessment according to SIGN/CASP], conflict of interest [stated vs. not stated], funding [financed from public funds vs. financed from industry], confounding, strengths / weaknesses [potential bias, over- or underestimation of potential effects]) |
|---------------------------------------------------------------------|----------------------------|--------------------------------------------------------------------------------------------------------------------------------------------------------------------------------------------------------------------------------------------------|--------------------------------------------------------------------------------------------------------------|---------------------------------------------|-------------------------------------------------------------|-----------------|-----------------------------------------------------------------------------------------------------------------------------------------------|---------------------------------------------------------------------------------------------------------------------------------------------------------------------------------------------------------------------------------------------------------------------------------------------|
|                                                                     |                            | Study region<br>Sample population<br>Sample size (M, F, M+F):<br>Age (mean, range)<br>No. of cases / no. of controls or exposed/unexposed<br>Time of recruitment / follow-up (mean, range)<br>Response (%)<br>(baseline minus loss to follow-up) | Disease (ICD-10)<br>Prescription<br>Questionnaire                                                            | exposure source                             | exposure assessment                                         | exposure levels |                                                                                                                                               |                                                                                                                                                                                                                                                                                             |
| Carey, 2018, 8494                                                   | Retrospective Cohort study | Study region:<br>Greater London (75 practices): study area bounded by M25 motorway around Greater London: 60 practices in outer London boroughs, 15 inner London boroughs                                                                        | Primary care database (Clinical Practice Research Datalink) -> first dementia diagnosis using Read codes for | Road traffic noise<br>Estimated at postcode | $L_N$ (23:00-07:00) ( $L_{eq,16h}$ produced identical data) | no categories   | Incident dementia: Table 3<br>HR = 1.02 (95% CI 1.00-1.05)<br><br>Sensitivity analysis with NO <sub>2</sub> :<br>HR = 1.01 (95% CI 0.98-1.03) | study quality:<br>+<br>Cohort study<br>conflict of interest: stated (none declared)<br>funding: stated (UK Natural                                                                                                                                                                          |

| Reference<br>(First author, publication year, S/N)<br>Meta-analysis | Study design | Population                                                                                                                                                                                                                                                                                                                                                             | Outcome                                           | Exposure        |                     |                 | Results                                                                                                                                                                                                                                                                                                                                                                                                                                                                                                                                                                                                                                                                        | Comments<br>(study quality [overall assessment according to SIGN/CASP], conflict of interest [stated vs. not stated], funding [financed from public funds vs. financed from industry], confounding, strengths / weaknesses [potential bias, over- or underestimation of potential effects]) |    |        |        |   |  |            |      |             |            |      |             |            |      |             |       |      |             |                   |      |             |                                                                                                                                                                                                                                                                                          |
|---------------------------------------------------------------------|--------------|------------------------------------------------------------------------------------------------------------------------------------------------------------------------------------------------------------------------------------------------------------------------------------------------------------------------------------------------------------------------|---------------------------------------------------|-----------------|---------------------|-----------------|--------------------------------------------------------------------------------------------------------------------------------------------------------------------------------------------------------------------------------------------------------------------------------------------------------------------------------------------------------------------------------------------------------------------------------------------------------------------------------------------------------------------------------------------------------------------------------------------------------------------------------------------------------------------------------|---------------------------------------------------------------------------------------------------------------------------------------------------------------------------------------------------------------------------------------------------------------------------------------------|----|--------|--------|---|--|------------|------|-------------|------------|------|-------------|------------|------|-------------|-------|------|-------------|-------------------|------|-------------|------------------------------------------------------------------------------------------------------------------------------------------------------------------------------------------------------------------------------------------------------------------------------------------|
|                                                                     |              | Study region<br>Sample population<br>Sample size (M, F, M+F):<br>Age (mean, range)<br>No. of cases / no. of controls or exposed/unexposed<br>Time of recruitment / follow-up (mean, range)<br>Response (%)<br>(baseline minus loss to follow-up)                                                                                                                       | Disease (ICD-10)<br>Prescription<br>Questionnaire | exposure source | exposure assessment | exposure levels |                                                                                                                                                                                                                                                                                                                                                                                                                                                                                                                                                                                                                                                                                |                                                                                                                                                                                                                                                                                             |    |        |        |   |  |            |      |             |            |      |             |            |      |             |       |      |             |                   |      |             |                                                                                                                                                                                                                                                                                          |
|                                                                     |              | <p>Sample size:<br/>(N=555,385 patients registered (7% of Greater London population)<br/>M+F= 130,978<br/>M= 65,130, F= 65,848</p> <p>Sample population:<br/>&gt; only patients between 50-79 years included<br/>-&gt;exclusion: existing dementia diagnosis by 1 January 2005 (n=391), living in care home (n=423), no Index of Multiple Deprivation (IMD) (n=77)</p> | dementia                                          | level           |                     |                 | <p>(sensitivity analysis performed with classifying dementia as Alzheimer's disease, vascular dementia or non-specific )</p> <p>Alzheimer's disease:</p> <table border="1"> <thead> <tr> <th>dB</th> <th>HR</th> <th>95% CI</th> </tr> </thead> <tbody> <tr> <td>0-49.4</td> <td>1</td> <td></td> </tr> <tr> <td>&gt;49.4-49.6</td> <td>0.95</td> <td>(0.76–1.18)</td> </tr> <tr> <td>&gt;49.6-50.3</td> <td>0.96</td> <td>(0.77–1.20)</td> </tr> <tr> <td>&gt;50.3-53.8</td> <td>0.94</td> <td>(0.75–1.18)</td> </tr> <tr> <td>≥53.8</td> <td>1.05</td> <td>(0.84–1.31)</td> </tr> <tr> <td>+2,7 (IQR change)</td> <td>1.03</td> <td>(0.99–1.07)</td> </tr> </tbody> </table> | dB                                                                                                                                                                                                                                                                                          | HR | 95% CI | 0-49.4 | 1 |  | >49.4-49.6 | 0.95 | (0.76–1.18) | >49.6-50.3 | 0.96 | (0.77–1.20) | >50.3-53.8 | 0.94 | (0.75–1.18) | ≥53.8 | 1.05 | (0.84–1.31) | +2,7 (IQR change) | 1.03 | (0.99–1.07) | <p>Environment Research Council, Medical Research Council, Economic and Social Research Council, Department for Environment, Food and Rural Affairs, and Department of Health through Environmental Exposure &amp; Health Initiative. Partly by National Institute for Environmental</p> |
| dB                                                                  | HR           | 95% CI                                                                                                                                                                                                                                                                                                                                                                 |                                                   |                 |                     |                 |                                                                                                                                                                                                                                                                                                                                                                                                                                                                                                                                                                                                                                                                                |                                                                                                                                                                                                                                                                                             |    |        |        |   |  |            |      |             |            |      |             |            |      |             |       |      |             |                   |      |             |                                                                                                                                                                                                                                                                                          |
| 0-49.4                                                              | 1            |                                                                                                                                                                                                                                                                                                                                                                        |                                                   |                 |                     |                 |                                                                                                                                                                                                                                                                                                                                                                                                                                                                                                                                                                                                                                                                                |                                                                                                                                                                                                                                                                                             |    |        |        |   |  |            |      |             |            |      |             |            |      |             |       |      |             |                   |      |             |                                                                                                                                                                                                                                                                                          |
| >49.4-49.6                                                          | 0.95         | (0.76–1.18)                                                                                                                                                                                                                                                                                                                                                            |                                                   |                 |                     |                 |                                                                                                                                                                                                                                                                                                                                                                                                                                                                                                                                                                                                                                                                                |                                                                                                                                                                                                                                                                                             |    |        |        |   |  |            |      |             |            |      |             |            |      |             |       |      |             |                   |      |             |                                                                                                                                                                                                                                                                                          |
| >49.6-50.3                                                          | 0.96         | (0.77–1.20)                                                                                                                                                                                                                                                                                                                                                            |                                                   |                 |                     |                 |                                                                                                                                                                                                                                                                                                                                                                                                                                                                                                                                                                                                                                                                                |                                                                                                                                                                                                                                                                                             |    |        |        |   |  |            |      |             |            |      |             |            |      |             |       |      |             |                   |      |             |                                                                                                                                                                                                                                                                                          |
| >50.3-53.8                                                          | 0.94         | (0.75–1.18)                                                                                                                                                                                                                                                                                                                                                            |                                                   |                 |                     |                 |                                                                                                                                                                                                                                                                                                                                                                                                                                                                                                                                                                                                                                                                                |                                                                                                                                                                                                                                                                                             |    |        |        |   |  |            |      |             |            |      |             |            |      |             |       |      |             |                   |      |             |                                                                                                                                                                                                                                                                                          |
| ≥53.8                                                               | 1.05         | (0.84–1.31)                                                                                                                                                                                                                                                                                                                                                            |                                                   |                 |                     |                 |                                                                                                                                                                                                                                                                                                                                                                                                                                                                                                                                                                                                                                                                                |                                                                                                                                                                                                                                                                                             |    |        |        |   |  |            |      |             |            |      |             |            |      |             |       |      |             |                   |      |             |                                                                                                                                                                                                                                                                                          |
| +2,7 (IQR change)                                                   | 1.03         | (0.99–1.07)                                                                                                                                                                                                                                                                                                                                                            |                                                   |                 |                     |                 |                                                                                                                                                                                                                                                                                                                                                                                                                                                                                                                                                                                                                                                                                |                                                                                                                                                                                                                                                                                             |    |        |        |   |  |            |      |             |            |      |             |            |      |             |       |      |             |                   |      |             |                                                                                                                                                                                                                                                                                          |

| Reference<br>(First author, publication year, S/N)<br>Meta-analysis | Study design | Population                                                                                                                                                                                                                                       | Outcome                                           | Exposure        |                     |                 | Results                                                                                                                                                                                                                                                                                                                                                                                                                                                                                                                                                                                                                                                                                                                               | Comments<br>(study quality [overall assessment according to SIGN/CASP], conflict of interest [stated vs. not stated], funding [financed from public funds vs. financed from industry], confounding, strengths / weaknesses [potential bias, over- or underestimation of potential effects]) |    |        |        |   |  |            |      |             |            |      |             |            |      |             |       |      |             |                   |      |             |    |    |        |        |   |  |                                                                                                                                                                                                                                                                                             |
|---------------------------------------------------------------------|--------------|--------------------------------------------------------------------------------------------------------------------------------------------------------------------------------------------------------------------------------------------------|---------------------------------------------------|-----------------|---------------------|-----------------|---------------------------------------------------------------------------------------------------------------------------------------------------------------------------------------------------------------------------------------------------------------------------------------------------------------------------------------------------------------------------------------------------------------------------------------------------------------------------------------------------------------------------------------------------------------------------------------------------------------------------------------------------------------------------------------------------------------------------------------|---------------------------------------------------------------------------------------------------------------------------------------------------------------------------------------------------------------------------------------------------------------------------------------------|----|--------|--------|---|--|------------|------|-------------|------------|------|-------------|------------|------|-------------|-------|------|-------------|-------------------|------|-------------|----|----|--------|--------|---|--|---------------------------------------------------------------------------------------------------------------------------------------------------------------------------------------------------------------------------------------------------------------------------------------------|
|                                                                     |              | Study region<br>Sample population<br>Sample size (M, F, M+F):<br>Age (mean, range)<br>No. of cases / no. of controls or exposed/unexposed<br>Time of recruitment / follow-up (mean, range)<br>Response (%)<br>(baseline minus loss to follow-up) | Disease (ICD-10)<br>Prescription<br>Questionnaire | exposure source | exposure assessment | exposure levels |                                                                                                                                                                                                                                                                                                                                                                                                                                                                                                                                                                                                                                                                                                                                       |                                                                                                                                                                                                                                                                                             |    |        |        |   |  |            |      |             |            |      |             |            |      |             |       |      |             |                   |      |             |    |    |        |        |   |  |                                                                                                                                                                                                                                                                                             |
|                                                                     |              | <p>Age:</p> <p>50-59 years: n=59,587<br/>60-69 years: n=41,013<br/>70-79 years: n=30,378</p> <p>Time of recruitment:<br/>2005-2013</p> <p>Response:<br/>-not applicable: secondary data</p> <p>Follow-up period: mean=6.9 years</p>              |                                                   |                 |                     |                 | <p>Vascular dementia:</p> <table border="1"> <thead> <tr> <th>dB</th> <th>HR</th> <th>95% CI</th> </tr> </thead> <tbody> <tr> <td>0-49.4</td> <td>1</td> <td></td> </tr> <tr> <td>&gt;49.4-49.6</td> <td>1.22</td> <td>(0.94–1.58)</td> </tr> <tr> <td>&gt;49.6-50.3</td> <td>1.23</td> <td>(0.94–1.59)</td> </tr> <tr> <td>&gt;50.3-53.8</td> <td>1.17</td> <td>(0.90–1.52)</td> </tr> <tr> <td>≥53.8</td> <td>1.09</td> <td>(0.83–1.42)</td> </tr> <tr> <td>+2,7 (IQR change)</td> <td>1.00</td> <td>(0.96–1.05)</td> </tr> </tbody> </table> <p>Non-specific:</p> <table border="1"> <thead> <tr> <th>dB</th> <th>HR</th> <th>95% CI</th> </tr> </thead> <tbody> <tr> <td>0-49.4</td> <td>1</td> <td></td> </tr> </tbody> </table> | dB                                                                                                                                                                                                                                                                                          | HR | 95% CI | 0-49.4 | 1 |  | >49.4-49.6 | 1.22 | (0.94–1.58) | >49.6-50.3 | 1.23 | (0.94–1.59) | >50.3-53.8 | 1.17 | (0.90–1.52) | ≥53.8 | 1.09 | (0.83–1.42) | +2,7 (IQR change) | 1.00 | (0.96–1.05) | dB | HR | 95% CI | 0-49.4 | 1 |  | <p>Hazards at King's College London in partnership with Public Health England and Imperial College London. confounding (controlled for): age, sex, ethnicity, smoking and body mass index, Index of Multiple Deprivation, ischaemic heart disease, stroke, diabetes, heart failure, NO2</p> |
| dB                                                                  | HR           | 95% CI                                                                                                                                                                                                                                           |                                                   |                 |                     |                 |                                                                                                                                                                                                                                                                                                                                                                                                                                                                                                                                                                                                                                                                                                                                       |                                                                                                                                                                                                                                                                                             |    |        |        |   |  |            |      |             |            |      |             |            |      |             |       |      |             |                   |      |             |    |    |        |        |   |  |                                                                                                                                                                                                                                                                                             |
| 0-49.4                                                              | 1            |                                                                                                                                                                                                                                                  |                                                   |                 |                     |                 |                                                                                                                                                                                                                                                                                                                                                                                                                                                                                                                                                                                                                                                                                                                                       |                                                                                                                                                                                                                                                                                             |    |        |        |   |  |            |      |             |            |      |             |            |      |             |       |      |             |                   |      |             |    |    |        |        |   |  |                                                                                                                                                                                                                                                                                             |
| >49.4-49.6                                                          | 1.22         | (0.94–1.58)                                                                                                                                                                                                                                      |                                                   |                 |                     |                 |                                                                                                                                                                                                                                                                                                                                                                                                                                                                                                                                                                                                                                                                                                                                       |                                                                                                                                                                                                                                                                                             |    |        |        |   |  |            |      |             |            |      |             |            |      |             |       |      |             |                   |      |             |    |    |        |        |   |  |                                                                                                                                                                                                                                                                                             |
| >49.6-50.3                                                          | 1.23         | (0.94–1.59)                                                                                                                                                                                                                                      |                                                   |                 |                     |                 |                                                                                                                                                                                                                                                                                                                                                                                                                                                                                                                                                                                                                                                                                                                                       |                                                                                                                                                                                                                                                                                             |    |        |        |   |  |            |      |             |            |      |             |            |      |             |       |      |             |                   |      |             |    |    |        |        |   |  |                                                                                                                                                                                                                                                                                             |
| >50.3-53.8                                                          | 1.17         | (0.90–1.52)                                                                                                                                                                                                                                      |                                                   |                 |                     |                 |                                                                                                                                                                                                                                                                                                                                                                                                                                                                                                                                                                                                                                                                                                                                       |                                                                                                                                                                                                                                                                                             |    |        |        |   |  |            |      |             |            |      |             |            |      |             |       |      |             |                   |      |             |    |    |        |        |   |  |                                                                                                                                                                                                                                                                                             |
| ≥53.8                                                               | 1.09         | (0.83–1.42)                                                                                                                                                                                                                                      |                                                   |                 |                     |                 |                                                                                                                                                                                                                                                                                                                                                                                                                                                                                                                                                                                                                                                                                                                                       |                                                                                                                                                                                                                                                                                             |    |        |        |   |  |            |      |             |            |      |             |            |      |             |       |      |             |                   |      |             |    |    |        |        |   |  |                                                                                                                                                                                                                                                                                             |
| +2,7 (IQR change)                                                   | 1.00         | (0.96–1.05)                                                                                                                                                                                                                                      |                                                   |                 |                     |                 |                                                                                                                                                                                                                                                                                                                                                                                                                                                                                                                                                                                                                                                                                                                                       |                                                                                                                                                                                                                                                                                             |    |        |        |   |  |            |      |             |            |      |             |            |      |             |       |      |             |                   |      |             |    |    |        |        |   |  |                                                                                                                                                                                                                                                                                             |
| dB                                                                  | HR           | 95% CI                                                                                                                                                                                                                                           |                                                   |                 |                     |                 |                                                                                                                                                                                                                                                                                                                                                                                                                                                                                                                                                                                                                                                                                                                                       |                                                                                                                                                                                                                                                                                             |    |        |        |   |  |            |      |             |            |      |             |            |      |             |       |      |             |                   |      |             |    |    |        |        |   |  |                                                                                                                                                                                                                                                                                             |
| 0-49.4                                                              | 1            |                                                                                                                                                                                                                                                  |                                                   |                 |                     |                 |                                                                                                                                                                                                                                                                                                                                                                                                                                                                                                                                                                                                                                                                                                                                       |                                                                                                                                                                                                                                                                                             |    |        |        |   |  |            |      |             |            |      |             |            |      |             |       |      |             |                   |      |             |    |    |        |        |   |  |                                                                                                                                                                                                                                                                                             |

| Reference<br>(First author, publication year, S/N)<br>Meta-analysis | Study design | Population                                                                                                                                                                                                                                       | Outcome                                           | Exposure        |                     |                 | Results                                                                                                                                                                                                                                                                                                                                                                          | Comments<br>(study quality [overall assessment according to SIGN/CASP], conflict of interest [stated vs. not stated], funding [financed from public funds vs. financed from industry], confounding, strengths / weaknesses [potential bias, over- or underestimation of potential effects]) |      |             |            |      |             |            |      |             |       |      |             |                   |      |             |                                                                                                                                                                                                                                                                                                      |
|---------------------------------------------------------------------|--------------|--------------------------------------------------------------------------------------------------------------------------------------------------------------------------------------------------------------------------------------------------|---------------------------------------------------|-----------------|---------------------|-----------------|----------------------------------------------------------------------------------------------------------------------------------------------------------------------------------------------------------------------------------------------------------------------------------------------------------------------------------------------------------------------------------|---------------------------------------------------------------------------------------------------------------------------------------------------------------------------------------------------------------------------------------------------------------------------------------------|------|-------------|------------|------|-------------|------------|------|-------------|-------|------|-------------|-------------------|------|-------------|------------------------------------------------------------------------------------------------------------------------------------------------------------------------------------------------------------------------------------------------------------------------------------------------------|
|                                                                     |              | Study region<br>Sample population<br>Sample size (M, F, M+F):<br>Age (mean, range)<br>No. of cases / no. of controls or exposed/unexposed<br>Time of recruitment / follow-up (mean, range)<br>Response (%)<br>(baseline minus loss to follow-up) | Disease (ICD-10)<br>Prescription<br>Questionnaire | exposure source | exposure assessment | exposure levels |                                                                                                                                                                                                                                                                                                                                                                                  |                                                                                                                                                                                                                                                                                             |      |             |            |      |             |            |      |             |       |      |             |                   |      |             |                                                                                                                                                                                                                                                                                                      |
|                                                                     |              |                                                                                                                                                                                                                                                  |                                                   |                 |                     |                 | <table border="1"> <tr> <td>&gt;49.4-49.6</td> <td>1.07</td> <td>(0.85–1.34)</td> </tr> <tr> <td>&gt;49.6-50.3</td> <td>0.97</td> <td>(0.77–1.23)</td> </tr> <tr> <td>&gt;50.3-53.8</td> <td>0.93</td> <td>(0.73–1.19)</td> </tr> <tr> <td>≥53.8</td> <td>1.14</td> <td>(0.91–1.43)</td> </tr> <tr> <td>+2,7 (IQR change)</td> <td>1.03</td> <td>(0.99–1.07)</td> </tr> </table> | >49.4-49.6                                                                                                                                                                                                                                                                                  | 1.07 | (0.85–1.34) | >49.6-50.3 | 0.97 | (0.77–1.23) | >50.3-53.8 | 0.93 | (0.73–1.19) | ≥53.8 | 1.14 | (0.91–1.43) | +2,7 (IQR change) | 1.03 | (0.99–1.07) | strengths,<br>weaknesses:<br>+cohort study-><br>hazard ratios<br>+ adequate definition and assessment of outcome<br>+adequate control for confounders+<br>adjustment of NO <sub>2</sub><br>+ adequate exposure assessment<br>+ high statistical power<br>+ ethics approval by Independent Scientific |
| >49.4-49.6                                                          | 1.07         | (0.85–1.34)                                                                                                                                                                                                                                      |                                                   |                 |                     |                 |                                                                                                                                                                                                                                                                                                                                                                                  |                                                                                                                                                                                                                                                                                             |      |             |            |      |             |            |      |             |       |      |             |                   |      |             |                                                                                                                                                                                                                                                                                                      |
| >49.6-50.3                                                          | 0.97         | (0.77–1.23)                                                                                                                                                                                                                                      |                                                   |                 |                     |                 |                                                                                                                                                                                                                                                                                                                                                                                  |                                                                                                                                                                                                                                                                                             |      |             |            |      |             |            |      |             |       |      |             |                   |      |             |                                                                                                                                                                                                                                                                                                      |
| >50.3-53.8                                                          | 0.93         | (0.73–1.19)                                                                                                                                                                                                                                      |                                                   |                 |                     |                 |                                                                                                                                                                                                                                                                                                                                                                                  |                                                                                                                                                                                                                                                                                             |      |             |            |      |             |            |      |             |       |      |             |                   |      |             |                                                                                                                                                                                                                                                                                                      |
| ≥53.8                                                               | 1.14         | (0.91–1.43)                                                                                                                                                                                                                                      |                                                   |                 |                     |                 |                                                                                                                                                                                                                                                                                                                                                                                  |                                                                                                                                                                                                                                                                                             |      |             |            |      |             |            |      |             |       |      |             |                   |      |             |                                                                                                                                                                                                                                                                                                      |
| +2,7 (IQR change)                                                   | 1.03         | (0.99–1.07)                                                                                                                                                                                                                                      |                                                   |                 |                     |                 |                                                                                                                                                                                                                                                                                                                                                                                  |                                                                                                                                                                                                                                                                                             |      |             |            |      |             |            |      |             |       |      |             |                   |      |             |                                                                                                                                                                                                                                                                                                      |



| Reference<br>(First author, publication year, S/N)<br>Meta-analysis | Study design          | Population                                                                                                                                                                                                                                                                                         | Outcome                                                                                                                                                                   | Exposure               |                                                                                                                                               |                                                                                                                                                      | Results                                                                                                                                                                                                                                                                                                                                                                                                                | Comments<br>(study quality [overall assessment according to SIGN/CASP], conflict of interest [stated vs. not stated], funding [financed from public funds vs. financed from industry], confounding, strengths / weaknesses [potential bias, over- or underestimation of potential effects])<br>Advisory Committee |
|---------------------------------------------------------------------|-----------------------|----------------------------------------------------------------------------------------------------------------------------------------------------------------------------------------------------------------------------------------------------------------------------------------------------|---------------------------------------------------------------------------------------------------------------------------------------------------------------------------|------------------------|-----------------------------------------------------------------------------------------------------------------------------------------------|------------------------------------------------------------------------------------------------------------------------------------------------------|------------------------------------------------------------------------------------------------------------------------------------------------------------------------------------------------------------------------------------------------------------------------------------------------------------------------------------------------------------------------------------------------------------------------|-------------------------------------------------------------------------------------------------------------------------------------------------------------------------------------------------------------------------------------------------------------------------------------------------------------------|
|                                                                     |                       | Study region<br>Sample population<br>Sample size (M, F, M+F):<br>Age (mean, range)<br>No. of cases / no. of controls or exposed/unexposed<br>Time of recruitment / follow-up (mean, range)<br>Response (%)<br>(baseline minus loss to follow-up)                                                   | Disease (ICD-10)<br>Prescription<br>Questionnaire                                                                                                                         | exposure source        | exposure assessment                                                                                                                           | exposure levels                                                                                                                                      |                                                                                                                                                                                                                                                                                                                                                                                                                        |                                                                                                                                                                                                                                                                                                                   |
| Floud, S. 2011, 751, Europe<br>HYENA Study<br>Yes                   | Cross-sectional study | Study region:<br>London Heathrow (UK), Amsterdam Schiphol (The Netherlands), Stockholm Arlanda & Bromma (Sweden), Milan Malpensa (Italy), Berlin Tegel (Germany), Athen Elephtherios Venizelos (Greece) airports<br><br>Study population:<br>randomly selected sample (stratified random sampling) | - self-reported prescribed medication two weeks preceding the interview<br>- coded according to the ATC classification system:<br>anxiolytics, hypnotics, antidepressants | Aircraft, Road traffic | Aircraft noise (2002):<br>L <sub>eq,16h</sub><br>(07-23h or 06-22h)<br><br>L <sub>N</sub><br>(23-07h or 22-06h)<br><br>Integrated noise Model | L <sub>eq,16h</sub><br>35-76 dB<br><br>L <sub>N</sub><br>30-70 dB<br><br>Cut offs*:<br>→<br>L <sub>eq,16h</sub> : 35 dB<br>aircraft;<br>45dB<br>road | ORs of medication use related to aircraft noise per 10 dB (from Table 4)<br><br>Anxiolytics or hypnotics (noise, OR (95%CI), N)<br>Aircraft: L <sub>eq,16h</sub> : 1.14 (0.97-1.34), N=4,642<br>Aircraft: L <sub>N</sub> : 1.10 (0.93- 1.31), N= 4,641<br>Road traffic: L <sub>eq,24h</sub> : 1.11 (0.92-1.34), N=4,642<br><br>Anxiolytics (noise, OR (95%CI), N)<br>Aircraft: L <sub>eq,16h</sub> : 1.28 (1.04-1.57), | study quality:<br>-<br>Cross sectional study design<br><br>conflict of interest:<br>none declared<br><br>funding:<br>stated (HYENA by European Commission and individual grants see                                                                                                                               |

| Reference<br>(First author, publication year, S/N)<br>Meta-analysis | Study design | Population                                                                                                                                                                                                                                                 | Outcome                                           | Exposure                                                                                                                                                                          |                                                                                                                      |                                                                                                                                                                                                                                                                                                                                                                                                 | Results                                                                                                                                                                                                                                          | Comments<br>(study quality [overall assessment according to SIGN/CASP], conflict of interest [stated vs. not stated], funding [financed from public funds vs. financed from industry], confounding, strengths / weaknesses [potential bias, over- or underestimation of potential effects]) |
|---------------------------------------------------------------------|--------------|------------------------------------------------------------------------------------------------------------------------------------------------------------------------------------------------------------------------------------------------------------|---------------------------------------------------|-----------------------------------------------------------------------------------------------------------------------------------------------------------------------------------|----------------------------------------------------------------------------------------------------------------------|-------------------------------------------------------------------------------------------------------------------------------------------------------------------------------------------------------------------------------------------------------------------------------------------------------------------------------------------------------------------------------------------------|--------------------------------------------------------------------------------------------------------------------------------------------------------------------------------------------------------------------------------------------------|---------------------------------------------------------------------------------------------------------------------------------------------------------------------------------------------------------------------------------------------------------------------------------------------|
|                                                                     |              | Study region<br>Sample population<br>Sample size (M, F, M+F):<br>Age (mean, range)<br>No. of cases / no. of controls or exposed/unexposed<br>Time of recruitment / follow-up (mean, range)<br>Response (%)<br>(baseline minus loss to follow-up)           | Disease (ICD-10)<br>Prescription<br>Questionnaire | exposure source                                                                                                                                                                   | exposure assessment                                                                                                  | exposure levels                                                                                                                                                                                                                                                                                                                                                                                 |                                                                                                                                                                                                                                                  |                                                                                                                                                                                                                                                                                             |
|                                                                     |              | using noise contour maps)<br><br>Sample size:<br>M+F=4861<br>M: 2404, F= 2457<br>For regression models:<br>M+F: 4642<br><br>Age:<br>Mean: 57.9 +/- 7.1 years<br><br>Exposed/unexposed:<br>not applicable<br><br>Time of recruitment / follow-up: 2004-2006 |                                                   | (INM) except UK (national Aircraft Noise Contour model, ANCON)<br>- Maps: 1dB resolution (250x250m spatial resolution)<br><br>Road traffic noise:<br>Leq, 24h<br>- cut off: 45 dB | noise<br>→<br>Leq,24h: 35 dB<br>→ LN:<br>30 dB aircraft;<br>45 dB road noise<br><br>*All noise values under cut-offs | N=4,642<br>Aircraft: LN: 1.27 (1.01- 1.59), N= 4,641<br>Road traffic: Leq,24h: 1.06 (0.84-1.33), N=4,642<br><br>Hypnotics (noise, OR (95%CI), N)<br>Aircraft: Leq,16h: 0.96 (0.76-1.22), N=4,642<br>Aircraft: LN: 0.90 (0.70- 1.14), N= 4,641<br>Road traffic: Leq,24h: 1.28 (0.96-1.71), N=4,642<br><br>Antidepressants (noise, OR (95%CI), N)<br>Aircraft: Leq,16h: 1.07 (0.90-1.26), N=4,642 | study)→ public funding<br><br>confounding (adjusted for): age, sex, BMI, smoking, alcohol, education, physical activity (and road traffic noise for aircraft noise exposure as well as aircraft noise for road traffic noise exposure in tab. 4) |                                                                                                                                                                                                                                                                                             |

| Reference<br>(First author, publication year, S/N)<br>Meta-analysis | Study design | Population                                                                                                                                                                                                                                       | Outcome                                           | Exposure                                                                                                     |                            |                                                                                               | Results                                                                                                                                                                                                                                                                                    | Comments<br>(study quality [overall assessment according to SIGN/CASP], conflict of interest [stated vs. not stated], funding [financed from public funds vs. financed from industry], confounding, strengths / weaknesses [potential bias, over- or underestimation of potential effects]) |
|---------------------------------------------------------------------|--------------|--------------------------------------------------------------------------------------------------------------------------------------------------------------------------------------------------------------------------------------------------|---------------------------------------------------|--------------------------------------------------------------------------------------------------------------|----------------------------|-----------------------------------------------------------------------------------------------|--------------------------------------------------------------------------------------------------------------------------------------------------------------------------------------------------------------------------------------------------------------------------------------------|---------------------------------------------------------------------------------------------------------------------------------------------------------------------------------------------------------------------------------------------------------------------------------------------|
|                                                                     |              | Study region<br>Sample population<br>Sample size (M, F, M+F):<br>Age (mean, range)<br>No. of cases / no. of controls or exposed/unexposed<br>Time of recruitment / follow-up (mean, range)<br>Response (%)<br>(baseline minus loss to follow-up) | Disease (ICD-10)<br>Prescription<br>Questionnaire | exposure source                                                                                              | exposure assessment        | exposure levels                                                                               |                                                                                                                                                                                                                                                                                            |                                                                                                                                                                                                                                                                                             |
|                                                                     |              | <p>Response:<br/>39% response for aircraft noise (&lt;50 dB)<br/>45% (50 to &lt; 65 dB)<br/>45% (≥ 65 dB)<br/>large differences between countries (for information see Floud et al. 2013)</p>                                                    |                                                   | National noise models<br>- Maps: 1dB resolution (10x10m spatial resolution), except for UK (5 dB resolution) | were set to cut-off values | Aircraft: LN: 0.96 (0.81- 1.13), N= 4,641<br>Road traffic: Leq,24h: 0.97 (0.78-1.21), N=4,642 | <p>strengths/<br/>weaknesses:<br/>+ adequate consideration of potential confounding<br/>+ multilevel logistic regression (taking differences between countries into account)<br/>+ stratified random sampling<br/>+ adequate exposure measurement<br/>+ difference between daytime and</p> |                                                                                                                                                                                                                                                                                             |

| Reference<br>(First author, publication year, S/N)<br>Meta-analysis | Population   |                                                                                                                                                                                                                                                  | Outcome                                           | Exposure        |                     |                 | Results | Comments<br>(study quality [overall assessment according to SIGN/CASP], conflict of interest [stated vs. not stated], funding [financed from public funds vs. financed from industry], confounding, strengths / weaknesses [potential bias, over- or underestimation of potential effects]) |
|---------------------------------------------------------------------|--------------|--------------------------------------------------------------------------------------------------------------------------------------------------------------------------------------------------------------------------------------------------|---------------------------------------------------|-----------------|---------------------|-----------------|---------|---------------------------------------------------------------------------------------------------------------------------------------------------------------------------------------------------------------------------------------------------------------------------------------------|
|                                                                     | Study design | Study region<br>Sample population<br>Sample size (M, F, M+F):<br>Age (mean, range)<br>No. of cases / no. of controls or exposed/unexposed<br>Time of recruitment / follow-up (mean, range)<br>Response (%)<br>(baseline minus loss to follow-up) | Disease (ICD-10)<br>Prescription<br>Questionnaire | exposure source | exposure assessment | exposure levels |         |                                                                                                                                                                                                                                                                                             |
|                                                                     |              |                                                                                                                                                                                                                                                  |                                                   |                 |                     |                 |         | nighttime aircraft noise<br>- cross-sectional<br>- response not stated in this publication → low response mentioned in Floud et al. 2013<br>- self-reported outcome measurement<br>- non-prescribed medications not mentioned (other associations to hypnotics possible)                    |

| Reference<br>(First author, publication year, S/N)<br>Meta-analysis | Study design                              | Population                                                                                                                                                                                                                                       | Outcome                                                                                                                                                        | Exposure        |                                                                                                   |                                                                                                                                             | Results                                                                                                                                                                                                                                                                                     | Comments<br>(study quality [overall assessment according to SIGN/CASP], conflict of interest [stated vs. not stated], funding [financed from public funds vs. financed from industry], confounding, strengths / weaknesses [potential bias, over- or underestimation of potential effects]) |
|---------------------------------------------------------------------|-------------------------------------------|--------------------------------------------------------------------------------------------------------------------------------------------------------------------------------------------------------------------------------------------------|----------------------------------------------------------------------------------------------------------------------------------------------------------------|-----------------|---------------------------------------------------------------------------------------------------|---------------------------------------------------------------------------------------------------------------------------------------------|---------------------------------------------------------------------------------------------------------------------------------------------------------------------------------------------------------------------------------------------------------------------------------------------|---------------------------------------------------------------------------------------------------------------------------------------------------------------------------------------------------------------------------------------------------------------------------------------------|
|                                                                     |                                           | Study region<br>Sample population<br>Sample size (M, F, M+F):<br>Age (mean, range)<br>No. of cases / no. of controls or exposed/unexposed<br>Time of recruitment / follow-up (mean, range)<br>Response (%)<br>(baseline minus loss to follow-up) | Disease (ICD-10)<br>Prescription<br>Questionnaire                                                                                                              | exposure source | exposure assessment                                                                               | exposure levels                                                                                                                             |                                                                                                                                                                                                                                                                                             |                                                                                                                                                                                                                                                                                             |
| Fuks, 2019, 8750                                                    | Longitudinal but cross-sectional analysis | Study region:<br>Germany (North Rhine-Westphalia)<br><br>Sample size:<br>F = 4.874 (baseline sample)<br>F= 834 (follow-up sample)<br>F= 288 (analysis sample with complete data)<br><br>Sample population:<br>Data from ongoing SALIA study      | Cognitive function<br><br>CERAD-Plus (Consortium to Establish a Registry on Alzheimer's Disease) neuropsychological assessment battery<br>4 cognitive domains: | Road 2006       | Modelled for most exposed façade (30.5-73.8 dB)<br><br>L <sub>DEN</sub><br><br>L <sub>NIGHT</sub> | L <sub>DEN</sub> ≥50dB vs. <50dB<br><br>L <sub>NIGHT</sub> ≥50dB vs. <50dB<br><br>L <sub>NIGHT</sub> ≥40dB vs. <40dB (sensitivity analysis) | physician –diagnosed depression: n = 82, 11.0%<br><br>MMSE<br>L <sub>DEN</sub><br>Main model: OR = 0.97 (95% CI 0.52-1.81)<br>+ annoyance: OR = 0.98 (95% CI 0.52-1.85)<br>+PM <sub>10</sub> , NO <sub>2</sub> : OR = 0.85 (95% CI 0.44-1.65)<br>+ depression: OR = 0.97 (95% CI 0.52-1.81) | - air particulate level not considered<br><br>study quality: - (to +)<br>Cross-sectional analysis<br>conflict of interest: stated<br>funding: stated<br>confounding (controlled for): age, smoking, passive smoking, education.<br>Additional models controlled for noise                   |

| Referen<br>ce<br>(First<br>author,<br>publica<br>tion<br>year,<br>S/N)<br>Meta-a<br>nalysis | Study<br>desig<br>n | Population                                                                                                                                                                                                                                                | Outcome                                                                                                | Exposure           |                        |                    | Results                                                                                                                                                                                                                                            | Comments<br>(study quality<br>[overall assessment<br>according to<br>SIGN/CASP],<br>conflict of interest<br>[stated vs. not stated],<br>funding [financed<br>from public funds vs.<br>financed from<br>industry],<br>confounding,<br>strengths /<br>weaknesses<br>[potential bias, over-<br>or underestimation of<br>potential effects]) |
|---------------------------------------------------------------------------------------------|---------------------|-----------------------------------------------------------------------------------------------------------------------------------------------------------------------------------------------------------------------------------------------------------|--------------------------------------------------------------------------------------------------------|--------------------|------------------------|--------------------|----------------------------------------------------------------------------------------------------------------------------------------------------------------------------------------------------------------------------------------------------|------------------------------------------------------------------------------------------------------------------------------------------------------------------------------------------------------------------------------------------------------------------------------------------------------------------------------------------|
|                                                                                             |                     | Study region<br>Sample population<br>Sample size (M, F, M+F):<br>Age (mean, range)<br>No. of cases / no. of controls<br>or exposed/unexposed<br>Time of recruitment /<br>follow-up (mean, range)<br>Response (%)<br>(baseline minus loss to<br>follow-up) | Disease (ICD-10)<br>Prescription<br>Questionnaire                                                      | exposure<br>source | exposure<br>assessment | exposure<br>levels |                                                                                                                                                                                                                                                    |                                                                                                                                                                                                                                                                                                                                          |
|                                                                                             |                     | Age:<br>analysis sample: 74.2 years ( $\pm$<br>2.2)                                                                                                                                                                                                       | semantic<br>memory, episodic<br>memory,<br>constructional<br>praxis, executive<br>functions            |                    |                        |                    | <i>L</i> <sub>NIGHT</sub><br>Main model: OR = 1.33 (95% CI<br>0.75-2.36)<br>+ annoyance: OR = 1.38 (95% CI<br>0.76-2.49)<br>+PM <sub>10</sub> , NO <sub>2</sub> : OR = 1.26 (95% CI<br>0.68-2.34)<br>+ depression: OR = 1.33 (95% CI<br>0.75-2.36) | annoyance, PM <sub>10</sub> &<br>NO <sub>2</sub> , or diagnosed<br>depression                                                                                                                                                                                                                                                            |
|                                                                                             |                     | No. of cases<br>-                                                                                                                                                                                                                                         |                                                                                                        |                    |                        |                    |                                                                                                                                                                                                                                                    | strengths,<br>weaknesses:<br>-Cross-sectional<br>analysis within<br>longitudinal study,<br>with basic<br>information about<br>chronology between<br>exposition and<br>outcome                                                                                                                                                            |
|                                                                                             |                     | Time of recruitment<br>Baseline 1985-1994<br>Follow-up 2007-2010                                                                                                                                                                                          | Mini-Mental<br>State<br>Examination<br>(MMSE) -> used<br>for diagnosis of<br>dementia and<br>Alzheimer |                    |                        |                    | Total score<br><i>L</i> <sub>DEN</sub><br>Main model: OR = 1.69 (95% CI<br>0.94-3.04)<br>+ annoyance: OR = 1.84 (95% CI<br>1.01-3.38)                                                                                                              | -very low follow-up<br>and only a small                                                                                                                                                                                                                                                                                                  |
|                                                                                             |                     | Response:<br>Baseline: 70%<br>Follow-up: 17% of baseline<br>sample                                                                                                                                                                                        | Cognitive scores                                                                                       |                    |                        |                    |                                                                                                                                                                                                                                                    |                                                                                                                                                                                                                                                                                                                                          |

| Reference<br>(First author, publication year, S/N)<br>Meta-analysis | Study design | Population                                                                                                                                                                                                                                       | Outcome                                                                                                                                                              | Exposure        |                     |                 | Results                                                                                                                                                                                                                                                                                                                                                      | Comments<br>(study quality [overall assessment according to SIGN/CASP], conflict of interest [stated vs. not stated], funding [financed from public funds vs. financed from industry], confounding, strengths / weaknesses [potential bias, over- or underestimation of potential effects]) |
|---------------------------------------------------------------------|--------------|--------------------------------------------------------------------------------------------------------------------------------------------------------------------------------------------------------------------------------------------------|----------------------------------------------------------------------------------------------------------------------------------------------------------------------|-----------------|---------------------|-----------------|--------------------------------------------------------------------------------------------------------------------------------------------------------------------------------------------------------------------------------------------------------------------------------------------------------------------------------------------------------------|---------------------------------------------------------------------------------------------------------------------------------------------------------------------------------------------------------------------------------------------------------------------------------------------|
|                                                                     |              | Study region<br>Sample population<br>Sample size (M, F, M+F):<br>Age (mean, range)<br>No. of cases / no. of controls or exposed/unexposed<br>Time of recruitment / follow-up (mean, range)<br>Response (%)<br>(baseline minus loss to follow-up) | Disease (ICD-10)<br>Prescription<br>Questionnaire                                                                                                                    | exposure source | exposure assessment | exposure levels |                                                                                                                                                                                                                                                                                                                                                              |                                                                                                                                                                                                                                                                                             |
|                                                                     |              |                                                                                                                                                                                                                                                  | dichotomized using age and education standardized z-scores > 0 to indicate impaired cognition.<br><br>Note: Only results for MMSE and total score extracted and used |                 |                     |                 | +PM <sub>10</sub> , NO <sub>2</sub> : OR = 1.87 (95% CI 0.99-3.52)<br>+ depression: OR = 1.68 (95% CI 0.93-3.04)<br><br><i>L<sub>NIGHT</sub></i><br>Main model: OR = 0.87 (95% CI 0.51-1.49)<br>+ annoyance: OR = 0.95 (95% CI 0.54-1.65)<br>+PM <sub>10</sub> , NO <sub>2</sub> : OR = 0.83 (95% CI 0.47-1.48)<br>+ depression: OR = 0.87(95% CI 0.51-1.49) | subset with noise data included in the analysis<br>- noise dichotomized<br>- no threshold for cognitive disorder used<br><br>+ adequate definition and assessment of outcome<br>+adequate control for confounders, including air particulates<br>+ adequate exposure                        |

| Referen<br>ce<br>(First<br>author,<br>publica<br>tion<br>year,<br>S/N)<br>Meta-a<br>nalysis | Study<br>desig<br>n                                                                                                     | Population                                                                                                                                                                                                                                                                           | Outcome                                                                                                                                                                                                                                            | Exposure                                                                                                  |                        |                    | Results | Comments<br>(study quality<br>[overall assessment<br>according to<br>SIGN/CASP],<br>conflict of interest<br>[stated vs. not stated],<br>funding [financed<br>from public funds vs.<br>financed from<br>industry],<br>confounding,<br>strengths /<br>weaknesses<br>[potential bias, over-<br>or underestimation of<br>potential effects])<br>assessment |                                                                                                                                                                                                                                   |
|---------------------------------------------------------------------------------------------|-------------------------------------------------------------------------------------------------------------------------|--------------------------------------------------------------------------------------------------------------------------------------------------------------------------------------------------------------------------------------------------------------------------------------|----------------------------------------------------------------------------------------------------------------------------------------------------------------------------------------------------------------------------------------------------|-----------------------------------------------------------------------------------------------------------|------------------------|--------------------|---------|--------------------------------------------------------------------------------------------------------------------------------------------------------------------------------------------------------------------------------------------------------------------------------------------------------------------------------------------------------|-----------------------------------------------------------------------------------------------------------------------------------------------------------------------------------------------------------------------------------|
|                                                                                             |                                                                                                                         | Study region<br>Sample population<br>Sample size (M, F, M+F):<br>Age (mean, range)<br>No. of cases / no. of controls<br>or exposed/unexposed<br>Time of recruitment /<br>follow-up (mean, range)<br>Response (%)<br>(baseline minus loss to<br>follow-up)                            | Disease (ICD-10)<br>Prescription<br>Questionnaire                                                                                                                                                                                                  | exposure<br>source                                                                                        | exposure<br>assessment | exposure<br>levels |         |                                                                                                                                                                                                                                                                                                                                                        |                                                                                                                                                                                                                                   |
| Genera<br>al,<br>2019a,<br>8488                                                             | Case-c<br>ontrol<br>study<br>with<br>Cross-<br>sectio<br>nal<br>analys<br>is<br>within<br>cohort<br>study<br>(NES<br>DA | Study region:<br>Netherlands (mostly recruited<br>from cities of Amsterdam,<br>Leiden and Groningen)<br><br>Sample size:<br>M+F=2,980<br>M= 1,007, F=1,973<br><br>Sample population:<br>"persons with a range of<br>pathophysiology were<br>included"<br>-> Recruitment from primary | Cases: current<br>diagnosis of<br>depressive<br>disorders (major<br>depressive<br>disorder and<br>dysthymia) and<br>anxiety disorder<br>(panic disorder,<br>agrophobia,<br>generalized<br>anxiety disorder,<br>social phobia) -><br>CIDI interview | Traffic<br>noise =<br>Road+<br>Rail+<br>Air<br><br>Noise data<br>from 2007<br><br>->combine<br>d analysis |                        | L <sub>DEN</sub>   | -       | Depressive disorder/ and or anxiety<br>disorder<br>Cases: n=1,783/ Controls (n=1,197)<br>OR: 1.17, 95% CI 1.05-1.30<br><br>Depressive disorder:<br>Cases: n=1,275/ Controls (n=1,197)<br>OR: 1.17, 95% CI 1.03-1.32<br><br>Anxiety disorder:<br>Cases: n=1,363/ Controls (n=1,197)<br>OR: 1.22, 95% CI 1.09-1.38                                       | study quality:<br>-to(+)<br>Cross-sectional<br>analysis<br>conflict of interest:<br>stated<br>funding:<br>stated<br>confounding<br>(controlled for): sex,<br>age, education and<br>household income.<br>strengths,<br>weaknesses: |



| Referen<br>ce<br>(First<br>author,<br>publica<br>tion<br>year,<br>S/N)<br>Meta-a<br>nalysis | Study<br>desig<br>n | Population                                                                                                                                                                                                                                                | Outcome                                                                                                                                                                                                                                       | Exposure           |                        |                    | Results                                                                                                               | Comments<br>(study quality<br>[overall assessment<br>according to<br>SIGN/CASP],<br>conflict of interest<br>[stated vs. not stated],<br>funding [financed<br>from public funds vs.<br>financed from<br>industry],<br>confounding,<br>strengths /<br>weaknesses<br>[potential bias, over-<br>or underestimation of<br>potential effects]) |
|---------------------------------------------------------------------------------------------|---------------------|-----------------------------------------------------------------------------------------------------------------------------------------------------------------------------------------------------------------------------------------------------------|-----------------------------------------------------------------------------------------------------------------------------------------------------------------------------------------------------------------------------------------------|--------------------|------------------------|--------------------|-----------------------------------------------------------------------------------------------------------------------|------------------------------------------------------------------------------------------------------------------------------------------------------------------------------------------------------------------------------------------------------------------------------------------------------------------------------------------|
|                                                                                             |                     | Study region<br>Sample population<br>Sample size (M, F, M+F):<br>Age (mean, range)<br>No. of cases / no. of controls<br>or exposed/unexposed<br>Time of recruitment /<br>follow-up (mean, range)<br>Response (%)<br>(baseline minus loss to<br>follow-up) | Disease (ICD-10)<br>Prescription<br>Questionnaire                                                                                                                                                                                             | exposure<br>source | exposure<br>assessment | exposure<br>levels |                                                                                                                       |                                                                                                                                                                                                                                                                                                                                          |
|                                                                                             | study)              | care (54%), specialized mental<br>health care (27%), community<br>(19%)<br><br>Age:<br>43 years (14) controls<br>41 years (12) cases<br><br>No. of cases / no. of controls<br>See results<br><br>Time of recruitment<br>2004-2007                         | (DSM-IV criteria)<br><br>Controls:<br>individuals<br>without currant<br>depression and/<br>or anxiety<br>disorder<br>diagnosis<br><br>Measures:<br>-Inventory of<br>Depression<br>Symptomatology<br>(IDS)<br>-Beck Anxiety<br>Inventory (BAI) |                    |                        |                    | (linear regression for association of<br>disease severity and noise was also<br>performed: results are not displayed) | -Cross-sectional<br>analysis within<br>longitudinal study,<br>with basic<br>information about<br>chronology between<br>exposition and<br>outcome<br><br>+ adequate definition<br>and assessment of<br>outcome<br>+adequate control for<br>confounders<br>+ adequate exposure<br>assessment                                               |

| Reference<br>(First author, publication year, S/N)<br>Meta-analysis | Study design                                   | Population                                                                                                                                                                                                                                       | Outcome                                                                                          | Exposure                                                                    |                                                                                           |                 | Results                                                                                                                                                                                  | Comments<br>(study quality [overall assessment according to SIGN/CASP], conflict of interest [stated vs. not stated], funding [financed from public funds vs. financed from industry], confounding, strengths / weaknesses [potential bias, over- or underestimation of potential effects]) |
|---------------------------------------------------------------------|------------------------------------------------|--------------------------------------------------------------------------------------------------------------------------------------------------------------------------------------------------------------------------------------------------|--------------------------------------------------------------------------------------------------|-----------------------------------------------------------------------------|-------------------------------------------------------------------------------------------|-----------------|------------------------------------------------------------------------------------------------------------------------------------------------------------------------------------------|---------------------------------------------------------------------------------------------------------------------------------------------------------------------------------------------------------------------------------------------------------------------------------------------|
|                                                                     |                                                | Study region<br>Sample population<br>Sample size (M, F, M+F):<br>Age (mean, range)<br>No. of cases / no. of controls or exposed/unexposed<br>Time of recruitment / follow-up (mean, range)<br>Response (%)<br>(baseline minus loss to follow-up) | Disease (ICD-10)<br>Prescription<br>Questionnaire                                                | exposure source                                                             | exposure assessment                                                                       | exposure levels |                                                                                                                                                                                          |                                                                                                                                                                                                                                                                                             |
|                                                                     |                                                | Response:<br>Unclear                                                                                                                                                                                                                             | - Fear<br>questionnaire<br>(FQ)                                                                  |                                                                             |                                                                                           |                 |                                                                                                                                                                                          | + high statistical power<br>+ ethics approval by Ethical Committee of participating universities                                                                                                                                                                                            |
| General, 2019b, 8757                                                | Cross-sectional analysis of pooled data from 8 | Study region:<br>Netherlands<br><br>Sample size:<br>N = 32,487<br><i>NEMESIS-2</i> : n = 6,381<br><i>HELIUS</i> : n = 4,634<br><i>NTR</i> : n = 11,388                                                                                           | Depression<br><br><i>NEMESIS-2</i> & <i>NESDA</i> : 12-month prevalence based on semi-structured | Traffic noise (road, rail and air combined, possibly as arithmetic average) | Noise modelled by the Netherlands Environmental Agency, available at the six-digit postal | -               | Prevalence of depression (%)<br><i>NEMESIS-2</i> : 6.4<br><i>HELIUS</i> : 7.3<br><i>NTR</i> : 6.3<br><i>NESDA</i> : 5.2<br><i>HOORN</i> : 5.1<br><i>LASA</i> : 5.0<br><i>NL-SH</i> : 5.8 | study quality:<br>-<br>Cross-sectional analysis<br>conflict of interest:<br>stated<br>funding:<br>stated                                                                                                                                                                                    |

| Reference<br>(First author, publication year, S/N)<br>Meta-analysis | Study design                                                           | Population                                                                                                                                                                                                                                                                                                                                                       | Outcome                                                                                                                                                                                                         | Exposure                  |                                                  |                                                                                                                                                                                                                                                                                                                                                                                                                                                                                        | Results                                                                                                                                                                                                                                                                             | Comments<br>(study quality [overall assessment according to SIGN/CASP], conflict of interest [stated vs. not stated], funding [financed from public funds vs. financed from industry], confounding, strengths / weaknesses [potential bias, over- or underestimation of potential effects]) |
|---------------------------------------------------------------------|------------------------------------------------------------------------|------------------------------------------------------------------------------------------------------------------------------------------------------------------------------------------------------------------------------------------------------------------------------------------------------------------------------------------------------------------|-----------------------------------------------------------------------------------------------------------------------------------------------------------------------------------------------------------------|---------------------------|--------------------------------------------------|----------------------------------------------------------------------------------------------------------------------------------------------------------------------------------------------------------------------------------------------------------------------------------------------------------------------------------------------------------------------------------------------------------------------------------------------------------------------------------------|-------------------------------------------------------------------------------------------------------------------------------------------------------------------------------------------------------------------------------------------------------------------------------------|---------------------------------------------------------------------------------------------------------------------------------------------------------------------------------------------------------------------------------------------------------------------------------------------|
|                                                                     |                                                                        | Study region<br>Sample population<br>Sample size (M, F, M+F):<br>Age (mean, range)<br>No. of cases / no. of controls or exposed/unexposed<br>Time of recruitment / follow-up (mean, range)<br>Response (%)<br>(baseline minus loss to follow-up)                                                                                                                 | Disease (ICD-10)<br>Prescription<br>Questionnaire                                                                                                                                                               | exposure source           | exposure assessment                              | exposure levels                                                                                                                                                                                                                                                                                                                                                                                                                                                                        |                                                                                                                                                                                                                                                                                     |                                                                                                                                                                                                                                                                                             |
|                                                                     | population-based or case-control cohorts (NEMESIS-2, HELIUS, NTR, HOO) | <p>NESDA: n = 2,472<br/>HOORN: n = 2,667<br/>LASA: n = 1,893<br/>NL-SH: n = 1,575<br/>Generations<sup>2</sup>: n = 1,477</p> <p>Sample population: Netherlands Mental Health Survey &amp; Incidence Study-2<br/>NEMESIS-2: (cohort) general population aged 18-64 years nationwide<br/>Healthy Life in an Urban Setting Study<br/>HELIUS: (cohort) different</p> | <p>Composite International Diagnostic Interview (CIDI); people with anxiety disorders excluded from control group<br/>HELIUS: 9-item Patient Health Questionnaire (PHQ-9 ≥10)<br/>NTR: Hospital Anxiety and</p> | Noise data from 2007-2008 | code level and matched to addresses.<br><br>LDEN | <p>Generations<sup>2</sup>: 4.0<br/>Traffic noise (no info on increase per dB):<br/>Pooled analysis<br/>OR = 1.05 (95% CI 0.96-1.15)<br/><br/>NEMESIS-2: OR = 1.02 (95% CI 0.91-1.15)<br/>HELIUS: OR = 0.95 (95% CI 0.84-1.09)<br/>NTR: OR = 1.01 (95% CI 0.93-1.10)<br/>NESDA: OR = 1.17 (95% CI 1.03-1.32)<br/>HOORN: OR = 1.19 (95% CI 1.01-1.39)<br/>LASA: OR = 1.21 (95% CI 0.97-1.50)<br/>NL-SH: OR = 0.88 (95% CI 0.71-1.07)<br/>Generations<sup>2</sup>: OR = 1.04 (95% CI</p> | <p>confounding (controlled for): sex, age, years of education and income.<br/>strengths, weaknesses:<br/>-Cross-sectional analysis within longitudinal studies,<br/>- Violation of chronology between exposition and outcome for 4 of 8 studies -&gt; exposition assessed after</p> |                                                                                                                                                                                                                                                                                             |

| Reference<br>(First author, publication year, S/N)<br>Meta-analysis | Study design                                          | Population                                                                                                                                                                                                                                                                                                                                                                        | Outcome                                                                                                                                                                                                              | Exposure        |                     |                 | Results    | Comments<br>(study quality [overall assessment according to SIGN/CASP], conflict of interest [stated vs. not stated], funding [financed from public funds vs. financed from industry], confounding, strengths / weaknesses [potential bias, over- or underestimation of potential effects]) |
|---------------------------------------------------------------------|-------------------------------------------------------|-----------------------------------------------------------------------------------------------------------------------------------------------------------------------------------------------------------------------------------------------------------------------------------------------------------------------------------------------------------------------------------|----------------------------------------------------------------------------------------------------------------------------------------------------------------------------------------------------------------------|-----------------|---------------------|-----------------|------------|---------------------------------------------------------------------------------------------------------------------------------------------------------------------------------------------------------------------------------------------------------------------------------------------|
|                                                                     |                                                       | Study region<br>Sample population<br>Sample size (M, F, M+F):<br>Age (mean, range)<br>No. of cases / no. of controls or exposed/unexposed<br>Time of recruitment / follow-up (mean, range)<br>Response (%)<br>(baseline minus loss to follow-up)                                                                                                                                  | Disease (ICD-10)<br>Prescription<br>Questionnaire                                                                                                                                                                    | exposure source | exposure assessment | exposure levels |            |                                                                                                                                                                                                                                                                                             |
|                                                                     | RN, LASA ; NL-S H, Generations <sup>2</sup> , NESD A) | ethnic groups in Amsterdam aged 18-70 years<br><br>Netherlands Twin Register<br><i>NTR</i> : (cohort): focus on gene and environment on development. Includes 11,388 individuals selected (siblings, twins, multiples, parents, spouses)<br><br>Netherlands Study of Depression and Anxiety<br><i>NESDA</i> : from urban and rural areas from Amsterdam, Leiden, Groningen (18-65 | Depression Scale (HADS-D ≥8)<br><br><i>NESDA</i> : CIDI<br><br><i>HOORN</i> : Center for Epidemiologic Studies<br>Depression Scale (CES-D ≥ 23)<br><br><i>LASA</i> : CES-D ≥23<br><br><i>NL-SH</i> : Four-Dimensiona |                 |                     |                 | 0.77-1.40) | outcome<br>- assessment of noise (mean but no energetic summation) missing<br>-heterogeneous study population<br>- Low response rate in some cohorts<br>- air particulate level estimated but not considered as a confounder<br><br>+ large sample size<br>+ adequate (but                  |

| Referen<br>ce<br>(First<br>author,<br>publica<br>tion<br>year,<br>S/N)<br>Meta-a<br>nalysis | Study<br>desig<br>n | Population                                                                                                                                                                                                                                                | Outcome                                                                                                            | Exposure           |                        |                    | Results | Comments<br>(study quality<br>[overall assessment<br>according to<br>SIGN/CASP],<br>conflict of interest<br>[stated vs. not stated],<br>funding [financed<br>from public funds vs.<br>financed from<br>industry],<br>confounding,<br>strengths /<br>weaknesses<br>[potential bias, over-<br>or underestimation of<br>potential effects]) |
|---------------------------------------------------------------------------------------------|---------------------|-----------------------------------------------------------------------------------------------------------------------------------------------------------------------------------------------------------------------------------------------------------|--------------------------------------------------------------------------------------------------------------------|--------------------|------------------------|--------------------|---------|------------------------------------------------------------------------------------------------------------------------------------------------------------------------------------------------------------------------------------------------------------------------------------------------------------------------------------------|
|                                                                                             |                     | Study region<br>Sample population<br>Sample size (M, F, M+F):<br>Age (mean, range)<br>No. of cases / no. of controls<br>or exposed/unexposed<br>Time of recruitment /<br>follow-up (mean, range)<br>Response (%)<br>(baseline minus loss to<br>follow-up) | Disease (ICD-10)<br>Prescription<br>Questionnaire                                                                  | exposure<br>source | exposure<br>assessment | exposure<br>levels |         |                                                                                                                                                                                                                                                                                                                                          |
|                                                                                             |                     | years)<br><br>New Hoorn Study<br><i>HOORN</i> : cohort study with<br>focus on diabetes (n=2,807,<br>aged 40-65 years at baseline)                                                                                                                         | I Symptom<br>Questionnaire<br>(4DSQ ≥ 6)<br><br><i>Generations</i> <sup>2</sup> : Beck<br>Depression<br>Inventory- |                    |                        |                    |         | heterogeneous)<br>definition and<br>assessment of<br>outcome<br>+adequate control for<br>confounders                                                                                                                                                                                                                                     |
|                                                                                             |                     | Longitudinal Ageing Study<br>Amsterdam<br><i>LASA</i> : Focusses on older<br>individuals around<br>Amsterdam, Oss and Zwolle<br>(n = 3,107 aged 55-85 years at<br>baseline in 1992/1993)                                                                  | II (BDI-II ≥ 20)                                                                                                   |                    |                        |                    |         |                                                                                                                                                                                                                                                                                                                                          |
|                                                                                             |                     | Netherlands Longitudinal                                                                                                                                                                                                                                  |                                                                                                                    |                    |                        |                    |         |                                                                                                                                                                                                                                                                                                                                          |

| Reference<br>(First author, publication year, S/N)<br>Meta-analysis | Study design | Population                                                                                                                                                                                                                                                                                                                            | Outcome                                           | Exposure        |                     |                 | Results | Comments<br>(study quality [overall assessment according to SIGN/CASP], conflict of interest [stated vs. not stated], funding [financed from public funds vs. financed from industry], confounding, strengths / weaknesses [potential bias, over- or underestimation of potential effects]) |
|---------------------------------------------------------------------|--------------|---------------------------------------------------------------------------------------------------------------------------------------------------------------------------------------------------------------------------------------------------------------------------------------------------------------------------------------|---------------------------------------------------|-----------------|---------------------|-----------------|---------|---------------------------------------------------------------------------------------------------------------------------------------------------------------------------------------------------------------------------------------------------------------------------------------------|
|                                                                     |              | Study region<br>Sample population<br>Sample size (M, F, M+F):<br>Age (mean, range)<br>No. of cases / no. of controls or exposed/unexposed<br>Time of recruitment / follow-up (mean, range)<br>Response (%)<br>(baseline minus loss to follow-up)                                                                                      | Disease (ICD-10)<br>Prescription<br>Questionnaire | exposure source | exposure assessment | exposure levels |         |                                                                                                                                                                                                                                                                                             |
|                                                                     |              | <p>Study on Hearing<br/>NL-SH: focus on hearing impairment (n=1,575, aged 18-64 years)<br/>Generations<sup>2</sup>: Follows first-time pregnant women (n=1,477)</p> <p>Age, mean years (SD):<br/>NEMESIS-2: 44 (13)<br/>HELIUS: 46 (14)<br/>NTR: 47 (13)<br/>NESDA: 42 (13)<br/>HOORN: 53 (7)<br/>LASA: 71 (9)<br/>NL-SH: 46 (12)</p> |                                                   |                 |                     |                 |         |                                                                                                                                                                                                                                                                                             |

| Reference<br>(First author, publication year, S/N)<br>Meta-analysis | Study design | Population                                                                                                                                                                                                                                       | Outcome                                           | Exposure        |                     |                 | Results | Comments<br>(study quality [overall assessment according to SIGN/CASP], conflict of interest [stated vs. not stated], funding [financed from public funds vs. financed from industry], confounding, strengths / weaknesses [potential bias, over- or underestimation of potential effects]) |
|---------------------------------------------------------------------|--------------|--------------------------------------------------------------------------------------------------------------------------------------------------------------------------------------------------------------------------------------------------|---------------------------------------------------|-----------------|---------------------|-----------------|---------|---------------------------------------------------------------------------------------------------------------------------------------------------------------------------------------------------------------------------------------------------------------------------------------------|
|                                                                     |              | Study region<br>Sample population<br>Sample size (M, F, M+F):<br>Age (mean, range)<br>No. of cases / no. of controls or exposed/unexposed<br>Time of recruitment / follow-up (mean, range)<br>Response (%)<br>(baseline minus loss to follow-up) | Disease (ICD-10)<br>Prescription<br>Questionnaire | exposure source | exposure assessment | exposure levels |         |                                                                                                                                                                                                                                                                                             |
|                                                                     |              | Generations <sup>2</sup> : 35 (47)                                                                                                                                                                                                               |                                                   |                 |                     |                 |         |                                                                                                                                                                                                                                                                                             |
|                                                                     |              | Sex (women in %) :<br>NEMESIS-2: 55<br>HELIUS: 54<br>NTR: 62<br>NESDA: 66<br>HOORN: 53<br>LASA: 55<br>NL-SH: 64<br>Generations <sup>2</sup> : 100                                                                                                |                                                   |                 |                     |                 |         |                                                                                                                                                                                                                                                                                             |
|                                                                     |              | No. of cases (%)<br>See results                                                                                                                                                                                                                  |                                                   |                 |                     |                 |         |                                                                                                                                                                                                                                                                                             |
|                                                                     |              | Time of recruitment                                                                                                                                                                                                                              |                                                   |                 |                     |                 |         |                                                                                                                                                                                                                                                                                             |

| Referen<br>ce<br>(First<br>author,<br>publica<br>tion<br>year,<br>S/N)<br>Meta-a<br>nalysis | Study<br>desig<br>n | Population                                                                                                                                                                                                                                                                                                                                        | Outcome                                           | Exposure           |                        |                    | Results | Comments<br>(study quality<br>[overall assessment<br>according to<br>SIGN/CASP],<br>conflict of interest<br>[stated vs. not stated],<br>funding [financed<br>from public funds vs.<br>financed from<br>industry],<br>confounding,<br>strengths /<br>weaknesses<br>[potential bias, over-<br>or underestimation of<br>potential effects]) |
|---------------------------------------------------------------------------------------------|---------------------|---------------------------------------------------------------------------------------------------------------------------------------------------------------------------------------------------------------------------------------------------------------------------------------------------------------------------------------------------|---------------------------------------------------|--------------------|------------------------|--------------------|---------|------------------------------------------------------------------------------------------------------------------------------------------------------------------------------------------------------------------------------------------------------------------------------------------------------------------------------------------|
|                                                                                             |                     | Study region<br>Sample population<br>Sample size (M, F, M+F):<br>Age (mean, range)<br>No. of cases / no. of controls<br>or exposed/unexposed<br>Time of recruitment /<br>follow-up (mean, range)<br>Response (%)<br>(baseline minus loss to<br>follow-up)                                                                                         | Disease (ICD-10)<br>Prescription<br>Questionnaire | exposure<br>source | exposure<br>assessment | exposure<br>levels |         |                                                                                                                                                                                                                                                                                                                                          |
|                                                                                             |                     | <p>NEMESIS-2: 2007-2009<br/>                     HELIUS: 2011-2015<br/>                     NTR: 2009-2010<br/>                     NESDA: 2004-2007<br/>                     HOORN: 2006-2007<br/>                     LASA: 2005-2006<br/>                     NL-SH: 2006-2008<br/>                     Generations<sup>2</sup>: 2009-2015</p> |                                                   |                    |                        |                    |         |                                                                                                                                                                                                                                                                                                                                          |
|                                                                                             |                     | <p>Response<br/>                     NEMESIS-2: 58% (de Graaf et<br/>                     al. 2010)<br/>                     HELIUS: 28% (Snijder et al.<br/>                     2017)<br/>                     NTR: 52% (Willemsen et al.<br/>                     2013)</p>                                                                    |                                                   |                    |                        |                    |         |                                                                                                                                                                                                                                                                                                                                          |



| Reference<br>(First author, publication year, S/N)<br>Meta-analysis | Study design       | Population                                                                                                                                                                                                                                                                                                                                                                           | Outcome                                                  | Exposure        |                                                                                |                                           | Results                                                                                                   | Comments<br>(study quality [overall assessment according to SIGN/CASP], conflict of interest [stated vs. not stated], funding [financed from public funds vs. financed from industry], confounding, strengths / weaknesses [potential bias, over- or underestimation of potential effects]) |
|---------------------------------------------------------------------|--------------------|--------------------------------------------------------------------------------------------------------------------------------------------------------------------------------------------------------------------------------------------------------------------------------------------------------------------------------------------------------------------------------------|----------------------------------------------------------|-----------------|--------------------------------------------------------------------------------|-------------------------------------------|-----------------------------------------------------------------------------------------------------------|---------------------------------------------------------------------------------------------------------------------------------------------------------------------------------------------------------------------------------------------------------------------------------------------|
|                                                                     |                    | Study region<br>Sample population<br>Sample size (M, F, M+F):<br>Age (mean, range)<br>No. of cases / no. of controls or exposed/unexposed<br>Time of recruitment / follow-up (mean, range)<br>Response (%)<br>(baseline minus loss to follow-up)                                                                                                                                     | Disease (ICD-10)<br>Prescription<br>Questionnaire        | exposure source | exposure assessment                                                            | exposure levels                           |                                                                                                           |                                                                                                                                                                                                                                                                                             |
|                                                                     |                    | <p>NESDA: 30% (Pennix et al. 2011, van Graaf et al. 2010)<br/>                     HOORN: 43% (Bouwman et al. 2011)<br/>                     LASA: 60% initial response (Hoogendijk et al. 2016)<br/>                     NL-SH: 35% (Goderie et al. 2019)<br/>                     Generations<sup>2</sup>: not calculated due to recruitment methods (see Wernand et al. 2014)</p> |                                                          |                 |                                                                                |                                           |                                                                                                           |                                                                                                                                                                                                                                                                                             |
| Greiser, E, 2010, H-2889<br>No (used                                | Case-control study | Study region:<br>Region around Cologne-Bonn Airport, Germany (Cologne, Rhein-Sieg area, Rheinisch-Bergischer area)                                                                                                                                                                                                                                                                   | Secondary data from eight insurance companies (ICD-9/10) | Aircraft noise  | L <sub>N</sub> (22-06h)<br>L <sub>D</sub> (06-22h)<br>L <sub>eq</sub> (23-01h) | L <sub>eq</sub> ≥ 35 dB<br>Other exposure | Anxiety and phobia:<br>- no elevated disease risk<br><br>Depression<br>- elevated risk for women to get a | study quality:<br>-<br><br>conflict of interest:<br>not stated                                                                                                                                                                                                                              |

| Reference<br>(First author, publication year, S/N)<br>Meta-analysis | Study design | Population                                                                                                                                                                                                                                                    | Outcome                                                                                                                                                                                            | Exposure                                                                                        |                     |                                                                                                                                                                                                                                                                                                                                  | Results                                                                                                                                                                                                                          | Comments<br>(study quality [overall assessment according to SIGN/CASP], conflict of interest [stated vs. not stated], funding [financed from public funds vs. financed from industry], confounding, strengths / weaknesses [potential bias, over- or underestimation of potential effects]) |
|---------------------------------------------------------------------|--------------|---------------------------------------------------------------------------------------------------------------------------------------------------------------------------------------------------------------------------------------------------------------|----------------------------------------------------------------------------------------------------------------------------------------------------------------------------------------------------|-------------------------------------------------------------------------------------------------|---------------------|----------------------------------------------------------------------------------------------------------------------------------------------------------------------------------------------------------------------------------------------------------------------------------------------------------------------------------|----------------------------------------------------------------------------------------------------------------------------------------------------------------------------------------------------------------------------------|---------------------------------------------------------------------------------------------------------------------------------------------------------------------------------------------------------------------------------------------------------------------------------------------|
|                                                                     |              | Study region<br>Sample population<br>Sample size (M, F, M+F):<br>Age (mean, range)<br>No. of cases / no. of controls or exposed/unexposed<br>Time of recruitment / follow-up (mean, range)<br>Response (%)<br>(baseline minus loss to follow-up)              | Disease (ICD-10)<br>Prescription<br>Questionnaire                                                                                                                                                  | exposure source                                                                                 | exposure assessment | exposure levels                                                                                                                                                                                                                                                                                                                  |                                                                                                                                                                                                                                  |                                                                                                                                                                                                                                                                                             |
| two interaction terms in model, difficult to interpret)             |              | Sample population:<br>Residents of the study region with data from 8 insurance companies (55% of the whole study population)<br><br>Sample size:<br>M+F=511,742<br>M=223,559, F=288,183<br><br>Age:<br>> 39 yrs.<br><br>No. of cases/ no. of controls: cases: | Anxiety/ Phobia:<br>ICD-9: 300 (anxiety, dissociative & somatoform disorders) / ICD-10: F40 (Phobic anxiety disorders), F41 (Other anxiety disorders)<br><br>Depression:<br>ICD-9: 311 (Depressive | Leq (03-05h)<br><br>Leq<br><br>2004 (basis are 6 noisiest months of the year)<br>Noise modeling | assessments ≥ 40 dB | stationary treatment for depression<br>- no risk for men<br><br>Psychosis:<br>- inconsistent results<br>- elevated risk for women only for the timeframe “night: 22-6h” and between “23-1h”<br><br>Figures 14-16 show graphics, but interaction terms (Age*Noise and Socialsupport*Noise) included in the model and not reported | funding:<br>financed from public funds (German Federal Institute for Environmental Research)<br><br>confounding (adjusted for):<br>Age<br>Considered: road and rail noise, social welfare in region, density of retirement homes |                                                                                                                                                                                                                                                                                             |

| Referen<br>ce<br>(First<br>author,<br>publica<br>tion<br>year,<br>S/N)<br>Meta-a<br>nalysis | Study<br>desig<br>n | Population                                                                                                                                                                                                                                                | Outcome                                                                                                                                                                                                                                                   | Exposure           |                        |                    | Results                                                                                                                                                                                                                                                                     | Comments<br>(study quality<br>[overall assessment<br>according to<br>SIGN/CASP],<br>conflict of interest<br>[stated vs. not stated],<br>funding [financed<br>from public funds vs.<br>financed from<br>industry],<br>confounding,<br>strengths /<br>weaknesses<br>[potential bias, over-<br>or underestimation of<br>potential effects]) |
|---------------------------------------------------------------------------------------------|---------------------|-----------------------------------------------------------------------------------------------------------------------------------------------------------------------------------------------------------------------------------------------------------|-----------------------------------------------------------------------------------------------------------------------------------------------------------------------------------------------------------------------------------------------------------|--------------------|------------------------|--------------------|-----------------------------------------------------------------------------------------------------------------------------------------------------------------------------------------------------------------------------------------------------------------------------|------------------------------------------------------------------------------------------------------------------------------------------------------------------------------------------------------------------------------------------------------------------------------------------------------------------------------------------|
|                                                                                             |                     | Study region<br>Sample population<br>Sample size (M, F, M+F):<br>Age (mean, range)<br>No. of cases / no. of controls<br>or exposed/unexposed<br>Time of recruitment /<br>follow-up (mean, range)<br>Response (%)<br>(baseline minus loss to<br>follow-up) | Disease (ICD-10)<br>Prescription<br>Questionnaire                                                                                                                                                                                                         | exposure<br>source | exposure<br>assessment | exposure<br>levels |                                                                                                                                                                                                                                                                             |                                                                                                                                                                                                                                                                                                                                          |
|                                                                                             |                     | Number of cases:<br>Anxiety and phobia:<br>M+F: 2,344<br>M: 709<br>F: 1,635<br>Depression:<br>M+F: 3,136<br>M: 981<br>F: 2,155<br>Psychoses:<br>M+F: 105,22<br>M: 3,599<br>F: 6,923<br><br>Time of recruitment/<br>follow-up: Variation of                | disorder, not<br>elsewhere<br>classified)/<br>ICD-10: F33<br>(Major depressive<br>disorder<br>recurrent), F34<br>(Persistent mood<br>disorders)<br><br>Psychoses:<br>ICD-9: 290<br>(Dementias), 291<br>(Alcohol induced<br>mental disorder),<br>292 (drug |                    |                        |                    | strengths/<br>weaknesses:<br>+ objective and<br>reliable outcome<br>measurement:<br>analysis of<br>ICD9/10-coded<br>insurance data<br>+ exposure<br>measurement<br>+ consideration of<br>other sources of noise<br>(railway/road traffic<br>noise)<br>- no consideration of |                                                                                                                                                                                                                                                                                                                                          |

| Referen<br>ce<br>(First<br>author,<br>publica<br>tion<br>year,<br>S/N)<br>Meta-a<br>nalysis | Study<br>desig<br>n | Population                                                                                                                                                                                                                                                | Outcome                                                                                                                                                                                                                                                                           | Exposure           |                        |                    | Results                                                                                                                                                                                                                                                                                                                                                    | Comments<br>(study quality<br>[overall assessment<br>according to<br>SIGN/CASP],<br>conflict of interest<br>[stated vs. not stated],<br>funding [financed<br>from public funds vs.<br>financed from<br>industry],<br>confounding,<br>strengths /<br>weaknesses<br>[potential bias, over-<br>or underestimation of<br>potential effects]) |
|---------------------------------------------------------------------------------------------|---------------------|-----------------------------------------------------------------------------------------------------------------------------------------------------------------------------------------------------------------------------------------------------------|-----------------------------------------------------------------------------------------------------------------------------------------------------------------------------------------------------------------------------------------------------------------------------------|--------------------|------------------------|--------------------|------------------------------------------------------------------------------------------------------------------------------------------------------------------------------------------------------------------------------------------------------------------------------------------------------------------------------------------------------------|------------------------------------------------------------------------------------------------------------------------------------------------------------------------------------------------------------------------------------------------------------------------------------------------------------------------------------------|
|                                                                                             |                     | Study region<br>Sample population<br>Sample size (M, F, M+F):<br>Age (mean, range)<br>No. of cases / no. of controls<br>or exposed/unexposed<br>Time of recruitment /<br>follow-up (mean, range)<br>Response (%)<br>(baseline minus loss to<br>follow-up) | Disease (ICD-10)<br>Prescription<br>Questionnaire                                                                                                                                                                                                                                 | exposure<br>source | exposure<br>assessment | exposure<br>levels |                                                                                                                                                                                                                                                                                                                                                            |                                                                                                                                                                                                                                                                                                                                          |
|                                                                                             |                     | observation between 2 and 6<br>years<br><br>Response:<br>55.4%                                                                                                                                                                                            | induced mental<br>disorder), 294<br>(Persistent<br>mental disorders<br>due to conditions<br>classified<br>elsewhere), 295<br>(Schizophrenic<br>disorders), 296<br>(Episodic mood<br>disorders), 297<br>(Delusional<br>disorders), 298<br>(Other<br>non-organic<br>psychoses), 299 |                    |                        |                    | outcome-specific<br>confounders (e.g.<br>lifestyle confounder)<br>- adjustment for<br>interaction term<br>age*aircraft noise<br>makes interpretation<br>of results complicated<br>(no significant<br>coefficient)<br>- Some ecological<br>measurements for<br>confounders used<br>(prevalence of local<br>social welfare; density<br>of nursing home beds) |                                                                                                                                                                                                                                                                                                                                          |

| Referen<br>ce<br>(First<br>author,<br>publica<br>tion<br>year,<br>S/N)<br>Meta-a<br>nalysis | Population          |                                                                                                                                                                                                                                                           | Outcome                                                                                                                                                                                                                                                         | Exposure           |                        |                    | Results | Comments<br>(study quality<br>[overall assessment<br>according to<br>SIGN/CASP],<br>conflict of interest<br>[stated vs. not stated],<br>funding [financed<br>from public funds vs.<br>financed from<br>industry],<br>confounding,<br>strengths /<br>weaknesses<br>[potential bias, over-<br>or underestimation of<br>potential effects]) |
|---------------------------------------------------------------------------------------------|---------------------|-----------------------------------------------------------------------------------------------------------------------------------------------------------------------------------------------------------------------------------------------------------|-----------------------------------------------------------------------------------------------------------------------------------------------------------------------------------------------------------------------------------------------------------------|--------------------|------------------------|--------------------|---------|------------------------------------------------------------------------------------------------------------------------------------------------------------------------------------------------------------------------------------------------------------------------------------------------------------------------------------------|
|                                                                                             | Study<br>desig<br>n | Study region<br>Sample population<br>Sample size (M, F, M+F):<br>Age (mean, range)<br>No. of cases / no. of controls<br>or exposed/unexposed<br>Time of recruitment /<br>follow-up (mean, range)<br>Response (%)<br>(baseline minus loss to<br>follow-up) | Disease (ICD-10)<br>Prescription<br>Questionnaire                                                                                                                                                                                                               | exposure<br>source | exposure<br>assessment | exposure<br>levels |         |                                                                                                                                                                                                                                                                                                                                          |
|                                                                                             |                     |                                                                                                                                                                                                                                                           | (Pervasive<br>developmental<br>disorders)/<br>ICD-10: F02<br>(Dementia in<br>other diseases<br>classified<br>elsewhere), F03<br>(Unspecific<br>dementia), F04<br>(Amnestic<br>disorder due to<br>known<br>physiological<br>conditions), F05<br>(Delirium due to |                    |                        |                    |         | - chronology of<br>exposure and<br>outcome not clear<br>- only respondents<br>over 39 yrs. analyzed<br>- air particulate level<br>not considered                                                                                                                                                                                         |

| Reference<br>(First author, publication year, S/N)<br>Meta-analysis | Study design          | Population                                                                                                                                                                                                                                       | Outcome                                                                                                                                                                                                                          | Exposure                      |                             |                                                  | Results                                                                                                                           | Comments<br>(study quality [overall assessment according to SIGN/CASP], conflict of interest [stated vs. not stated], funding [financed from public funds vs. financed from industry], confounding, strengths / weaknesses [potential bias, over- or underestimation of potential effects]) |
|---------------------------------------------------------------------|-----------------------|--------------------------------------------------------------------------------------------------------------------------------------------------------------------------------------------------------------------------------------------------|----------------------------------------------------------------------------------------------------------------------------------------------------------------------------------------------------------------------------------|-------------------------------|-----------------------------|--------------------------------------------------|-----------------------------------------------------------------------------------------------------------------------------------|---------------------------------------------------------------------------------------------------------------------------------------------------------------------------------------------------------------------------------------------------------------------------------------------|
|                                                                     |                       | Study region<br>Sample population<br>Sample size (M, F, M+F):<br>Age (mean, range)<br>No. of cases / no. of controls or exposed/unexposed<br>Time of recruitment / follow-up (mean, range)<br>Response (%)<br>(baseline minus loss to follow-up) | Disease (ICD-10)<br>Prescription<br>Questionnaire                                                                                                                                                                                | exposure source               | exposure assessment         | exposure levels                                  |                                                                                                                                   |                                                                                                                                                                                                                                                                                             |
| Halone n, Jaana I. 2014, 959, Finland Yes                           | Cross-sectional study | Study region:<br>Turku, Helsinki and Vantaa, Finland<br><br>Study population:<br>Public sector employees                                                                                                                                         | known physiol. cond.), F06 (Other mental disorders due to known physiol. cond.), F09 (Unspecific mental disorders due to known physiol. cond.)<br><br>Psychotropic medication use:<br><br>Anxiolytics (N05B)<br>Hypnotics (N05C) | Residential<br>l road traffic | L <sub>DEN</sub> (Modelled) | Five categorization levels:<br><br>≤45dB (Ref.), | Associations of road traffic noise and psychotropic medication use among men (from Table 3)<br><br>Noise level (dB)<br>OR (95%) n | Study quality:<br>-<br>Cross-sectional study design<br><br>Conflict of interests:<br>None stated                                                                                                                                                                                            |

| Reference<br>(First author, publication year, S/N)<br>Meta-analysis | Study design | Population                                                                                                                                                                                                                                       | Outcome                                                                                       | Exposure                                            |                                                |                                                                                                  | Results                         | Comments<br>(study quality [overall assessment according to SIGN/CASP], conflict of interest [stated vs. not stated], funding [financed from public funds vs. financed from industry], confounding, strengths / weaknesses [potential bias, over- or underestimation of potential effects]) |
|---------------------------------------------------------------------|--------------|--------------------------------------------------------------------------------------------------------------------------------------------------------------------------------------------------------------------------------------------------|-----------------------------------------------------------------------------------------------|-----------------------------------------------------|------------------------------------------------|--------------------------------------------------------------------------------------------------|---------------------------------|---------------------------------------------------------------------------------------------------------------------------------------------------------------------------------------------------------------------------------------------------------------------------------------------|
|                                                                     |              | Study region<br>Sample population<br>Sample size (M, F, M+F):<br>Age (mean, range)<br>No. of cases / no. of controls or exposed/unexposed<br>Time of recruitment / follow-up (mean, range)<br>Response (%)<br>(baseline minus loss to follow-up) | Disease (ICD-10)<br>Prescription<br>Questionnaire                                             | exposure source                                     | exposure assessment                            | exposure levels                                                                                  |                                 |                                                                                                                                                                                                                                                                                             |
|                                                                     |              | Sample size:<br>M+F=15,611<br>M= 3086, F=12,525                                                                                                                                                                                                  | Antidepressants (N06A) during the year of survey obtained from National Prescription Register | 45.1-50 dB,<br>50.1-55 dB,<br>55.1-60 dB,<br>>60 dB | ≤45<br>45.1-50<br>50.1-55<br>55.1-60<br>>60 dB | 1.00<br>0.90<br>(0.60–1.35)<br>1.25<br>(0.84–1.87)<br>0.87<br>(0.54–1.41)<br>0.79<br>(0.50–1.25) | 402<br>615<br>520<br>327<br>391 | Funding:<br>EU ERA-AGE2 program funded by the Academy of Finland and the Ministry of Social Affairs and Health. Kivimäki supported by the Medical Research Council and the Finnish Work Environment Fund and a professorial fellowship from the UK Economic and                             |
|                                                                     |              | Age:<br>Mean: 50.3 years<br>Range: 21-76 years                                                                                                                                                                                                   |                                                                                               |                                                     |                                                |                                                                                                  |                                 |                                                                                                                                                                                                                                                                                             |
|                                                                     |              | Exposed/unexposed:<br>See results                                                                                                                                                                                                                |                                                                                               |                                                     |                                                |                                                                                                  |                                 |                                                                                                                                                                                                                                                                                             |
|                                                                     |              | Time of recruitment/follow-up:<br>2000-2010                                                                                                                                                                                                      |                                                                                               |                                                     |                                                |                                                                                                  |                                 |                                                                                                                                                                                                                                                                                             |
|                                                                     |              | Response:                                                                                                                                                                                                                                        |                                                                                               |                                                     |                                                |                                                                                                  |                                 |                                                                                                                                                                                                                                                                                             |

| Reference<br>(First author, publication year, S/N)<br>Meta-analysis | Study design | Population                                                                                                                                                                                                                                       | Outcome                                           | Exposure        |                     |                                                                          | Results | Comments<br>(study quality [overall assessment according to SIGN/CASP], conflict of interest [stated vs. not stated], funding [financed from public funds vs. financed from industry], confounding, strengths / weaknesses [potential bias, over- or underestimation of potential effects]) |
|---------------------------------------------------------------------|--------------|--------------------------------------------------------------------------------------------------------------------------------------------------------------------------------------------------------------------------------------------------|---------------------------------------------------|-----------------|---------------------|--------------------------------------------------------------------------|---------|---------------------------------------------------------------------------------------------------------------------------------------------------------------------------------------------------------------------------------------------------------------------------------------------|
|                                                                     |              | Study region<br>Sample population<br>Sample size (M, F, M+F):<br>Age (mean, range)<br>No. of cases / no. of controls or exposed/unexposed<br>Time of recruitment / follow-up (mean, range)<br>Response (%)<br>(baseline minus loss to follow-up) | Disease (ICD-10)<br>Prescription<br>Questionnaire | exposure source | exposure assessment | exposure levels                                                          |         |                                                                                                                                                                                                                                                                                             |
|                                                                     |              | Unclear<br>69% for those who had left the participating organization, but unclear for others                                                                                                                                                     |                                                   |                 | range<br>18-79 dB)  | psychotropic medication use among women (from Table 4)<br>Adjusted model |         | Social Research Council.<br><br>Confounding (controlled for):<br>Age, occupational status, level of education, size of residence, marital status, job strain, chronic disease, area-level socioeconomic status, population density<br><br>Strength/weaknesses:                              |
|                                                                     |              |                                                                                                                                                                                                                                                  |                                                   |                 | Noise level (dB)    | OR (95%)                                                                 | N       |                                                                                                                                                                                                                                                                                             |
|                                                                     |              |                                                                                                                                                                                                                                                  |                                                   |                 | ≤45                 | 1.00                                                                     | 1610    |                                                                                                                                                                                                                                                                                             |
|                                                                     |              |                                                                                                                                                                                                                                                  |                                                   |                 | 45.1-50             | 0.93<br>(0.78–1.11)                                                      | 2398    |                                                                                                                                                                                                                                                                                             |
|                                                                     |              |                                                                                                                                                                                                                                                  |                                                   |                 | 50.1-55             | 0.86<br>(0.72–1.03)                                                      | 2059    |                                                                                                                                                                                                                                                                                             |
|                                                                     |              |                                                                                                                                                                                                                                                  |                                                   |                 | 55.1-60             | 1.00<br>(0.82–                                                           | 1404    |                                                                                                                                                                                                                                                                                             |



| Reference<br>(First author, publication year, S/N)<br>Meta-analysis | Study design | Population                                                                                                                                                                                                                                       | Outcome                                           | Exposure        |                     |                 | Results                                                                                                                                                                                           | Comments<br>(study quality [overall assessment according to SIGN/CASP], conflict of interest [stated vs. not stated], funding [financed from public funds vs. financed from industry], confounding, strengths / weaknesses [potential bias, over- or underestimation of potential effects]) |
|---------------------------------------------------------------------|--------------|--------------------------------------------------------------------------------------------------------------------------------------------------------------------------------------------------------------------------------------------------|---------------------------------------------------|-----------------|---------------------|-----------------|---------------------------------------------------------------------------------------------------------------------------------------------------------------------------------------------------|---------------------------------------------------------------------------------------------------------------------------------------------------------------------------------------------------------------------------------------------------------------------------------------------|
|                                                                     |              | Study region<br>Sample population<br>Sample size (M, F, M+F):<br>Age (mean, range)<br>No. of cases / no. of controls or exposed/unexposed<br>Time of recruitment / follow-up (mean, range)<br>Response (%)<br>(baseline minus loss to follow-up) | Disease (ICD-10)<br>Prescription<br>Questionnaire | exposure source | exposure assessment | exposure levels |                                                                                                                                                                                                   |                                                                                                                                                                                                                                                                                             |
|                                                                     |              |                                                                                                                                                                                                                                                  |                                                   |                 |                     |                 | 1.21)                                                                                                                                                                                             | + Appropriate measurement of traffic noise levels, although the modelling was done before the survey for some and after for others                                                                                                                                                          |
|                                                                     |              |                                                                                                                                                                                                                                                  |                                                   |                 |                     | >60             | 0.96<br>(0.80–<br>1.17)                                                                                                                                                                           | 1478                                                                                                                                                                                                                                                                                        |
|                                                                     |              |                                                                                                                                                                                                                                                  |                                                   |                 |                     |                 | Data not shown:<br>Stratification by trait anxiety score found no associations for traffic noise and psychotropic medication use among men or for traffic noise and the two outcomes among women. | + objective source for covariate information (age, sex, SES, addresses)<br>information obtained through employers registers or Population Register                                                                                                                                          |

| Reference<br>(First author, publication year, S/N)<br>Meta-analysis | Population   |                                                                                                                                                                                                                                                  | Outcome                                           | Exposure        |                     |                 | Results | Comments<br>(study quality [overall assessment according to SIGN/CASP], conflict of interest [stated vs. not stated], funding [financed from public funds vs. financed from industry], confounding, strengths / weaknesses [potential bias, over- or underestimation of potential effects]) |
|---------------------------------------------------------------------|--------------|--------------------------------------------------------------------------------------------------------------------------------------------------------------------------------------------------------------------------------------------------|---------------------------------------------------|-----------------|---------------------|-----------------|---------|---------------------------------------------------------------------------------------------------------------------------------------------------------------------------------------------------------------------------------------------------------------------------------------------|
|                                                                     | Study design | Study region<br>Sample population<br>Sample size (M, F, M+F):<br>Age (mean, range)<br>No. of cases / no. of controls or exposed/unexposed<br>Time of recruitment / follow-up (mean, range)<br>Response (%)<br>(baseline minus loss to follow-up) | Disease (ICD-10)<br>Prescription<br>Questionnaire | exposure source | exposure assessment | exposure levels |         |                                                                                                                                                                                                                                                                                             |
|                                                                     |              |                                                                                                                                                                                                                                                  |                                                   |                 |                     |                 |         | Center<br>+good objective outcome measurement<br>(National Prescription Register)<br>- cross-sectional design<br>- limited data on area-level confounders (air quality, green space, unsafe neighborhood)<br>- other noise exposure not considered<br>- May not be                          |

| Reference<br>(First author, publication year, S/N)<br>Meta-analysis | Population   |                                                                                                                                                                                                                                                  | Outcome                                           | Exposure        |                     |                 | Results | Comments<br>(study quality [overall assessment according to SIGN/CASP], conflict of interest [stated vs. not stated], funding [financed from public funds vs. financed from industry], confounding, strengths / weaknesses [potential bias, over- or underestimation of potential effects])                         |
|---------------------------------------------------------------------|--------------|--------------------------------------------------------------------------------------------------------------------------------------------------------------------------------------------------------------------------------------------------|---------------------------------------------------|-----------------|---------------------|-----------------|---------|---------------------------------------------------------------------------------------------------------------------------------------------------------------------------------------------------------------------------------------------------------------------------------------------------------------------|
|                                                                     | Study design | Study region<br>Sample population<br>Sample size (M, F, M+F):<br>Age (mean, range)<br>No. of cases / no. of controls or exposed/unexposed<br>Time of recruitment / follow-up (mean, range)<br>Response (%)<br>(baseline minus loss to follow-up) | Disease (ICD-10)<br>Prescription<br>Questionnaire | exposure source | exposure assessment | exposure levels |         |                                                                                                                                                                                                                                                                                                                     |
|                                                                     |              |                                                                                                                                                                                                                                                  |                                                   |                 |                     |                 |         | generalized to other countries due to window construction of Finnish houses (less noise due to double windows)<br>- unclear response rate (selection bias)<br>- anxiolytics may be indicative of sleep disorders (not differential)<br>- high percentage of women (80%) (generalizability)<br>- healthy worker bias |

| Reference<br>(First author, publication year, S/N)<br>Meta-analysis                                     | Study design               | Population                                                                                                                                                                                                                                       | Outcome                                           | Exposure                |                         |                         | Results                                                                                                                                                                                                                                                                                                                                                                                                                                                                    | Comments<br>(study quality [overall assessment according to SIGN/CASP], conflict of interest [stated vs. not stated], funding [financed from public funds vs. financed from industry], confounding, strengths / weaknesses [potential bias, over- or underestimation of potential effects]) |                            |        |      |         |                  |         |                  |         |                  |                         |
|---------------------------------------------------------------------------------------------------------|----------------------------|--------------------------------------------------------------------------------------------------------------------------------------------------------------------------------------------------------------------------------------------------|---------------------------------------------------|-------------------------|-------------------------|-------------------------|----------------------------------------------------------------------------------------------------------------------------------------------------------------------------------------------------------------------------------------------------------------------------------------------------------------------------------------------------------------------------------------------------------------------------------------------------------------------------|---------------------------------------------------------------------------------------------------------------------------------------------------------------------------------------------------------------------------------------------------------------------------------------------|----------------------------|--------|------|---------|------------------|---------|------------------|---------|------------------|-------------------------|
|                                                                                                         |                            | Study region<br>Sample population<br>Sample size (M, F, M+F):<br>Age (mean, range)<br>No. of cases / no. of controls or exposed/unexposed<br>Time of recruitment / follow-up (mean, range)<br>Response (%)<br>(baseline minus loss to follow-up) | Disease (ICD-10)<br>Prescription<br>Questionnaire | exposure source         | exposure assessment     | exposure levels         |                                                                                                                                                                                                                                                                                                                                                                                                                                                                            |                                                                                                                                                                                                                                                                                             |                            |        |      |         |                  |         |                  |         |                  |                         |
| Halone<br>n, J.I.,<br>2013,<br>H-2890,<br>Finland<br><br>(Evaluated together with Halone n et al. 2014) | Cross-sectional study      | see Halonen et al. 2014                                                                                                                                                                                                                          | see Halonen et al. 2014                           | see Halonen et al. 2014 | see Halonen et al. 2014 | see Halonen et al. 2014 | <p>Odds ratios and 95% confidence intervals for medication use by road traffic noise (L<sub>DEN</sub>), from Table 2</p> <table border="1"> <thead> <tr> <th>Noise level (dB)</th> <th>Antidepressant OR (95% CI)</th> </tr> </thead> <tbody> <tr> <td>≤45 dB</td> <td>1.00</td> </tr> <tr> <td>45.1-50</td> <td>0.99 (0.85-1.24)</td> </tr> <tr> <td>50.1-55</td> <td>1.03 (0.80-1.20)</td> </tr> <tr> <td>55.1-60</td> <td>0.98 (0.83-1.29)</td> </tr> </tbody> </table> | Noise level (dB)                                                                                                                                                                                                                                                                            | Antidepressant OR (95% CI) | ≤45 dB | 1.00 | 45.1-50 | 0.99 (0.85-1.24) | 50.1-55 | 1.03 (0.80-1.20) | 55.1-60 | 0.98 (0.83-1.29) | see Halonen et al. 2014 |
| Noise level (dB)                                                                                        | Antidepressant OR (95% CI) |                                                                                                                                                                                                                                                  |                                                   |                         |                         |                         |                                                                                                                                                                                                                                                                                                                                                                                                                                                                            |                                                                                                                                                                                                                                                                                             |                            |        |      |         |                  |         |                  |         |                  |                         |
| ≤45 dB                                                                                                  | 1.00                       |                                                                                                                                                                                                                                                  |                                                   |                         |                         |                         |                                                                                                                                                                                                                                                                                                                                                                                                                                                                            |                                                                                                                                                                                                                                                                                             |                            |        |      |         |                  |         |                  |         |                  |                         |
| 45.1-50                                                                                                 | 0.99 (0.85-1.24)           |                                                                                                                                                                                                                                                  |                                                   |                         |                         |                         |                                                                                                                                                                                                                                                                                                                                                                                                                                                                            |                                                                                                                                                                                                                                                                                             |                            |        |      |         |                  |         |                  |         |                  |                         |
| 50.1-55                                                                                                 | 1.03 (0.80-1.20)           |                                                                                                                                                                                                                                                  |                                                   |                         |                         |                         |                                                                                                                                                                                                                                                                                                                                                                                                                                                                            |                                                                                                                                                                                                                                                                                             |                            |        |      |         |                  |         |                  |         |                  |                         |
| 55.1-60                                                                                                 | 0.98 (0.83-1.29)           |                                                                                                                                                                                                                                                  |                                                   |                         |                         |                         |                                                                                                                                                                                                                                                                                                                                                                                                                                                                            |                                                                                                                                                                                                                                                                                             |                            |        |      |         |                  |         |                  |         |                  |                         |

| Reference<br>(First author, publication year, S/N)<br>Meta-analysis | Study design | Population                                                                                                                                                                                                                                       | Outcome                                           | Exposure        |                     |                  | Results                    | Comments<br>(study quality [overall assessment according to SIGN/CASP], conflict of interest [stated vs. not stated], funding [financed from public funds vs. financed from industry], confounding, strengths / weaknesses [potential bias, over- or underestimation of potential effects]) |
|---------------------------------------------------------------------|--------------|--------------------------------------------------------------------------------------------------------------------------------------------------------------------------------------------------------------------------------------------------|---------------------------------------------------|-----------------|---------------------|------------------|----------------------------|---------------------------------------------------------------------------------------------------------------------------------------------------------------------------------------------------------------------------------------------------------------------------------------------|
|                                                                     |              | Study region<br>Sample population<br>Sample size (M, F, M+F):<br>Age (mean, range)<br>No. of cases / no. of controls or exposed/unexposed<br>Time of recruitment / follow-up (mean, range)<br>Response (%)<br>(baseline minus loss to follow-up) | Disease (ICD-10)<br>Prescription<br>Questionnaire | exposure source | exposure assessment | exposure levels  |                            |                                                                                                                                                                                                                                                                                             |
|                                                                     |              |                                                                                                                                                                                                                                                  |                                                   |                 |                     |                  | >60<br>0.97<br>(0.78-1.20) |                                                                                                                                                                                                                                                                                             |
|                                                                     |              |                                                                                                                                                                                                                                                  |                                                   |                 |                     | Noise level (dB) | Anxiolytics OR (95% CI)    |                                                                                                                                                                                                                                                                                             |
|                                                                     |              |                                                                                                                                                                                                                                                  |                                                   |                 |                     | ≤45              | 1.00                       |                                                                                                                                                                                                                                                                                             |
|                                                                     |              |                                                                                                                                                                                                                                                  |                                                   |                 |                     | 45.1-50 dB       | 0.88<br>(0.58-1.10)        |                                                                                                                                                                                                                                                                                             |
|                                                                     |              |                                                                                                                                                                                                                                                  |                                                   |                 |                     | 50.1-55 dB       | 0.99<br>(0.73-1.36)        |                                                                                                                                                                                                                                                                                             |
|                                                                     |              |                                                                                                                                                                                                                                                  |                                                   |                 |                     | 55.1-60 dB       | 0.98<br>(0.69-1.38)        |                                                                                                                                                                                                                                                                                             |
|                                                                     |              |                                                                                                                                                                                                                                                  |                                                   |                 |                     | >60 dB           | 0.92                       |                                                                                                                                                                                                                                                                                             |

| Referen<br>ce<br>(First<br>author,<br>publica<br>tion<br>year,<br>S/N)<br>Meta-a<br>nalysis | Population          |                                                                                                                                                                                                                                                           | Outcome                                           | Exposure           |                        |                                                                          | Results                                                                                                                            | Comments<br>(study quality<br>[overall assessment<br>according to<br>SIGN/CASP],<br>conflict of interest<br>[stated vs. not stated],<br>funding [financed<br>from public funds vs.<br>financed from<br>industry],<br>confounding,<br>strengths /<br>weaknesses<br>[potential bias, over-<br>or underestimation of<br>potential effects]) |
|---------------------------------------------------------------------------------------------|---------------------|-----------------------------------------------------------------------------------------------------------------------------------------------------------------------------------------------------------------------------------------------------------|---------------------------------------------------|--------------------|------------------------|--------------------------------------------------------------------------|------------------------------------------------------------------------------------------------------------------------------------|------------------------------------------------------------------------------------------------------------------------------------------------------------------------------------------------------------------------------------------------------------------------------------------------------------------------------------------|
|                                                                                             | Study<br>desig<br>n | Study region<br>Sample population<br>Sample size (M, F, M+F):<br>Age (mean, range)<br>No. of cases / no. of controls<br>or exposed/unexposed<br>Time of recruitment /<br>follow-up (mean, range)<br>Response (%)<br>(baseline minus loss to<br>follow-up) | Disease (ICD-10)<br>Prescription<br>Questionnaire | exposure<br>source | exposure<br>assessment | exposure<br>levels                                                       |                                                                                                                                    |                                                                                                                                                                                                                                                                                                                                          |
|                                                                                             |                     |                                                                                                                                                                                                                                                           |                                                   |                    |                        |                                                                          | (0.65-1.28)                                                                                                                        |                                                                                                                                                                                                                                                                                                                                          |
|                                                                                             |                     |                                                                                                                                                                                                                                                           |                                                   |                    |                        | Noise<br>level<br>(dB)<br>≤45<br>45.1-50<br>50.1-55<br>55.1-60<br>>60 dB | Hypnotic use<br>OR<br>(95% CI)<br>1.00<br>0.84<br>(0.66-1.07)<br>0.87<br>(0.69-1.11)<br>0.86<br>(0.66-1.12)<br>0.83<br>(0.64-1.08) |                                                                                                                                                                                                                                                                                                                                          |

| Reference<br>(First author, publication year, S/N)<br>Meta-analysis | Study design | Population                                                                                                                                                                                                                                       | Outcome                                           | Exposure        |                     |                 | Results | Comments<br>(study quality [overall assessment according to SIGN/CASP], conflict of interest [stated vs. not stated], funding [financed from public funds vs. financed from industry], confounding, strengths / weaknesses [potential bias, over- or underestimation of potential effects]) |
|---------------------------------------------------------------------|--------------|--------------------------------------------------------------------------------------------------------------------------------------------------------------------------------------------------------------------------------------------------|---------------------------------------------------|-----------------|---------------------|-----------------|---------|---------------------------------------------------------------------------------------------------------------------------------------------------------------------------------------------------------------------------------------------------------------------------------------------|
|                                                                     |              | Study region<br>Sample population<br>Sample size (M, F, M+F):<br>Age (mean, range)<br>No. of cases / no. of controls or exposed/unexposed<br>Time of recruitment / follow-up (mean, range)<br>Response (%)<br>(baseline minus loss to follow-up) | Disease (ICD-10)<br>Prescription<br>Questionnaire | exposure source | exposure assessment | exposure levels |         |                                                                                                                                                                                                                                                                                             |

|                  |                                      |
|------------------|--------------------------------------|
| Noise level (dB) | Any medication use<br>OR<br>(95% CI) |
| ≤45              | 1.00                                 |
| 45.1-50          | 0.93<br>(0.79-1.09)                  |
| 50.1-55          | 0.92<br>(0.78-1.08)                  |
| 55.1-60          | 0.99<br>(0.82-1.18)                  |
| >60              | 0.93<br>(0.78-1.11)                  |

| Reference<br>(First author, publication year, S/N)<br>Meta-analysis | Study design | Population                                                                                                                                                                                                                                       | Outcome                                                                                  | Exposure                                                                                   |                                                                                                                     |                                                    | Results                                                                                                                                                                                                                        | Comments<br>(study quality [overall assessment according to SIGN/CASP], conflict of interest [stated vs. not stated], funding [financed from public funds vs. financed from industry], confounding, strengths / weaknesses [potential bias, over- or underestimation of potential effects]) |
|---------------------------------------------------------------------|--------------|--------------------------------------------------------------------------------------------------------------------------------------------------------------------------------------------------------------------------------------------------|------------------------------------------------------------------------------------------|--------------------------------------------------------------------------------------------|---------------------------------------------------------------------------------------------------------------------|----------------------------------------------------|--------------------------------------------------------------------------------------------------------------------------------------------------------------------------------------------------------------------------------|---------------------------------------------------------------------------------------------------------------------------------------------------------------------------------------------------------------------------------------------------------------------------------------------|
|                                                                     |              | Study region<br>Sample population<br>Sample size (M, F, M+F):<br>Age (mean, range)<br>No. of cases / no. of controls or exposed/unexposed<br>Time of recruitment / follow-up (mean, range)<br>Response (%)<br>(baseline minus loss to follow-up) | Disease (ICD-10)<br>Prescription<br>Questionnaire                                        | exposure source                                                                            | exposure assessment                                                                                                 | exposure levels                                    |                                                                                                                                                                                                                                |                                                                                                                                                                                                                                                                                             |
|                                                                     |              |                                                                                                                                                                                                                                                  |                                                                                          |                                                                                            |                                                                                                                     |                                                    | Adjusted for age, sex, occupational status, level of education, size of residence, marital status, job strain, area-level socioeconomic status, and population density                                                         |                                                                                                                                                                                                                                                                                             |
| He, 2019, 8831                                                      | cohort       | Study region:<br>Canada (Montreal)<br><br>Sample size:<br>F = 140,456<br><br>Sample population:<br>Hospital records of women with one pregnancy during the study period; exclusion of women with                                                 | Depression<br><br>ICD-9 296.2, 296.3, 300.4, 309.28, 311;<br><br>ICD-10 F32-F34.1, F41.2 | Total outdoor noise (land-use regression model):<br>mostly road traffic noise, vicinity to | L <sub>Aeq, 24h</sub><br><br>L <sub>DEN</sub><br><br>L <sub>NIGHT</sub><br><br>Noise matched to 6-digit postal code | < 55 dB<br>55.0-59.9 dB<br>60.0-64.9 dB<br>≥ 65 dB | Hazard ratios (adjusted)<br><br>L <sub>Aeq, 24h</sub><br><br>< 55 dB: reference<br>55.0-59.9 dB: HR=0.99 (0.83-1.19)<br>60.0-64.9 dB: HR=1.06 (95%CI 0.87-1.29)<br>≥ 65 dB: HR=0.92 (95% CI 0.65-1.32)<br><br>L <sub>DEN</sub> | study quality:<br>-<br>conflict of interest:<br>stated<br>funding:<br>stated<br>confounding<br>(controlled for):<br>maternal age, parity, multiple pregnancy, stillbirth,                                                                                                                   |



| Referen<br>ce<br>(First<br>author,<br>publica<br>tion<br>year,<br>S/N)<br>Meta-a<br>nalysis | Study<br>desig<br>n | Population                                                                                                                                                                                                                                                                                                               | Outcome                                           | Exposure                                                                                                                                                                   |                        |                    | Results                                                                                                                                                                                                                                                                                                      | Comments<br>(study quality<br>[overall assessment<br>according to<br>SIGN/CASP],<br>conflict of interest<br>[stated vs. not stated],<br>funding [financed<br>from public funds vs.<br>financed from<br>industry],<br>confounding,<br>strengths /<br>weaknesses<br>[potential bias, over-<br>or underestimation of<br>potential effects]) |
|---------------------------------------------------------------------------------------------|---------------------|--------------------------------------------------------------------------------------------------------------------------------------------------------------------------------------------------------------------------------------------------------------------------------------------------------------------------|---------------------------------------------------|----------------------------------------------------------------------------------------------------------------------------------------------------------------------------|------------------------|--------------------|--------------------------------------------------------------------------------------------------------------------------------------------------------------------------------------------------------------------------------------------------------------------------------------------------------------|------------------------------------------------------------------------------------------------------------------------------------------------------------------------------------------------------------------------------------------------------------------------------------------------------------------------------------------|
|                                                                                             |                     | Study region<br>Sample population<br>Sample size (M, F, M+F):<br>Age (mean, range)<br>No. of cases / no. of controls<br>or exposed/unexposed<br>Time of recruitment /<br>follow-up (mean, range)<br>Response (%)<br>(baseline minus loss to<br>follow-up)                                                                | Disease (ICD-10)<br>Prescription<br>Questionnaire | exposure<br>source                                                                                                                                                         | exposure<br>assessment | exposure<br>levels |                                                                                                                                                                                                                                                                                                              |                                                                                                                                                                                                                                                                                                                                          |
|                                                                                             |                     | mental disorders before or<br>during pregnancy)<br><br>Age at baseline:<br><i>With Depression</i><br>< 25 years: n=183<br>25-29 years n=285<br>30-34 years: n=271<br>≥ 35 years: n=220<br><br><i>No mental disorder</i><br>< 25 years: n=18,709<br>25-29 years n=35,644<br>30-34 years: n=46,175<br>≥ 35 years: n=37,034 |                                                   | aircraft<br>and<br>railway<br>traffic<br>additional<br>predictors<br>of noise)<br><br>Model<br>bases on<br>outdoor<br>samples<br>collected<br>in in 2010<br>(2 weeks<br>in |                        |                    | < 55 dB: reference<br>55.0-59.9 dB: HR=0.80 (0.50-1.27)<br>60.0-64.9 dB: HR=0.75 (95%CI<br>0.47-1.19)<br>≥ 65 dB: HR=0.77 (95% CI 0.48-1.23)<br><br>LDEN<br><br>< 55 dB: reference<br>55.0-59.9 dB: HR=1.01 (0.87-1.16)<br>60.0-64.9 dB: HR=1.09 (95%CI<br>0.90-1.32)<br>≥ 65 dB: HR=0.92 (95% CI 0.56-1.53) | comorbidity,<br>socioeconomic<br>deprivation,<br>neighbourhood<br>walkability, and time<br>period<br><br>strengths,<br>weaknesses:<br>-chronology between<br>exposition and<br>outcome not given<br>- noise summarized:<br>road traffic main<br>predictor, vicinity to<br>aircraft and railway                                           |

| Referen<br>ce<br>(First<br>author,<br>publica<br>tion<br>year,<br>S/N)<br>Meta-a<br>nalysis | Study<br>desig<br>n | Population                                                                                                                                                                                                                                                | Outcome                                           | Exposure                                            |                        |                    | Results | Comments<br>(study quality<br>[overall assessment<br>according to<br>SIGN/CASP],<br>conflict of interest<br>[stated vs. not stated],<br>funding [financed<br>from public funds vs.<br>financed from<br>industry],<br>confounding,<br>strengths /<br>weaknesses<br>[potential bias, over-<br>or underestimation of<br>potential effects]) |
|---------------------------------------------------------------------------------------------|---------------------|-----------------------------------------------------------------------------------------------------------------------------------------------------------------------------------------------------------------------------------------------------------|---------------------------------------------------|-----------------------------------------------------|------------------------|--------------------|---------|------------------------------------------------------------------------------------------------------------------------------------------------------------------------------------------------------------------------------------------------------------------------------------------------------------------------------------------|
|                                                                                             |                     | Study region<br>Sample population<br>Sample size (M, F, M+F):<br>Age (mean, range)<br>No. of cases / no. of controls<br>or exposed/unexposed<br>Time of recruitment /<br>follow-up (mean, range)<br>Response (%)<br>(baseline minus loss to<br>follow-up) | Disease (ICD-10)<br>Prescription<br>Questionnaire | exposure<br>source                                  | exposure<br>assessment | exposure<br>levels |         |                                                                                                                                                                                                                                                                                                                                          |
|                                                                                             |                     | No. of cases/ controls<br>Depression: n=959<br>No mental disorder:<br>n=137,562<br><br>Time of recruitment<br>Baseline: 2000-2016<br>Follow-up: Delivery – 2017<br><br>Response: not applicable<br>routine data-                                          |                                                   | summer)<br>and in<br>2014 (5<br>weeks in<br>spring) |                        |                    |         | traffic additional<br>predictors<br>- noise and social<br>economic information<br>only available at<br>neighborhood level<br>-info on moving<br>missing, linkage of<br>addresses<br><br>+ adequate definition<br>and assessment of<br>outcome<br>+adequate control for<br>confounders (air<br>particulates were                          |

| Reference<br>(First author, publication year, S/N)<br>Meta-analysis | Study design          | Population                                                                                                                                                                                                                                       | Outcome                                                                | Exposure           |                         |                                 | Results                                                                                         | Comments<br>(study quality [overall assessment according to SIGN/CASP], conflict of interest [stated vs. not stated], funding [financed from public funds vs. financed from industry], confounding, strengths / weaknesses [potential bias, over- or underestimation of potential effects]) |
|---------------------------------------------------------------------|-----------------------|--------------------------------------------------------------------------------------------------------------------------------------------------------------------------------------------------------------------------------------------------|------------------------------------------------------------------------|--------------------|-------------------------|---------------------------------|-------------------------------------------------------------------------------------------------|---------------------------------------------------------------------------------------------------------------------------------------------------------------------------------------------------------------------------------------------------------------------------------------------|
|                                                                     |                       | Study region<br>Sample population<br>Sample size (M, F, M+F):<br>Age (mean, range)<br>No. of cases / no. of controls or exposed/unexposed<br>Time of recruitment / follow-up (mean, range)<br>Response (%)<br>(baseline minus loss to follow-up) | Disease (ICD-10)<br>Prescription<br>Questionnaire                      | exposure source    | exposure assessment     | exposure levels                 |                                                                                                 |                                                                                                                                                                                                                                                                                             |
| Jonah, Brian A., 1981, 1182<br>Canada<br>No<br>(continuous)         | Cross-sectional study | Study region:<br>southern Ontario, Canada<br><br>Sample size:<br>M+F=1150<br><br>Age:<br>Not reported                                                                                                                                            | Anxiety by Spielberger's measure of trait anxiety as secondary outcome | Road traffic noise | $L_{eq,24h}$ calculated | Continuous analysis<br>45-75 dB | "The relationship between traffic noise and anxiety was weak, $r = .06$ , $p < .05$ " (Table 1) | Study quality<br><br>- (to - -)<br><br>Conflict of interest<br>None disclosed<br><br>Funding<br>Not mentioned                                                                                                                                                                               |

| Reference<br>(First author, publication year, S/N)<br>Meta-analysis | Study design | Population                                                                                                                                                                                                                                       | Outcome                                           | Exposure        |                     |                 | Results | Comments<br>(study quality [overall assessment according to SIGN/CASP], conflict of interest [stated vs. not stated], funding [financed from public funds vs. financed from industry], confounding, strengths / weaknesses [potential bias, over- or underestimation of potential effects]) |
|---------------------------------------------------------------------|--------------|--------------------------------------------------------------------------------------------------------------------------------------------------------------------------------------------------------------------------------------------------|---------------------------------------------------|-----------------|---------------------|-----------------|---------|---------------------------------------------------------------------------------------------------------------------------------------------------------------------------------------------------------------------------------------------------------------------------------------------|
|                                                                     |              | Study region<br>Sample population<br>Sample size (M, F, M+F):<br>Age (mean, range)<br>No. of cases / no. of controls or exposed/unexposed<br>Time of recruitment / follow-up (mean, range)<br>Response (%)<br>(baseline minus loss to follow-up) | Disease (ICD-10)<br>Prescription<br>Questionnaire | exposure source | exposure assessment | exposure levels |         |                                                                                                                                                                                                                                                                                             |
| variables,<br>outcome not<br>OR/RR)                                 |              | Exposed/unexposed:<br>NA<br><br>Time of recruitment/Follow-up:<br>14-month period, but not specified when<br><br>Response:<br>Not reported                                                                                                       |                                                   |                 |                     |                 |         | Confounding<br>Not adjusted<br><br>Strengths/<br>weaknesses:<br>+ Good noise assessment<br>+ outcome measurement of good internal consistency, validity and reliability<br>- No response %<br>- No adjustment for confounders between road traffic and                                      |

| Reference<br>(First author, publication year, S/N)<br>Meta-analysis | Population   |                                                                                                                                                                                                                                                  | Outcome                                           | Exposure        |                     |                 | Results | Comments<br>(study quality [overall assessment according to SIGN/CASP], conflict of interest [stated vs. not stated], funding [financed from public funds vs. financed from industry], confounding, strengths / weaknesses [potential bias, over- or underestimation of potential effects])                              |
|---------------------------------------------------------------------|--------------|--------------------------------------------------------------------------------------------------------------------------------------------------------------------------------------------------------------------------------------------------|---------------------------------------------------|-----------------|---------------------|-----------------|---------|--------------------------------------------------------------------------------------------------------------------------------------------------------------------------------------------------------------------------------------------------------------------------------------------------------------------------|
|                                                                     | Study design | Study region<br>Sample population<br>Sample size (M, F, M+F):<br>Age (mean, range)<br>No. of cases / no. of controls or exposed/unexposed<br>Time of recruitment / follow-up (mean, range)<br>Response (%)<br>(baseline minus loss to follow-up) | Disease (ICD-10)<br>Prescription<br>Questionnaire | exposure source | exposure assessment | exposure levels |         |                                                                                                                                                                                                                                                                                                                          |
|                                                                     |              |                                                                                                                                                                                                                                                  |                                                   |                 |                     |                 |         | anxiety<br>- cross-sectional study<br>- Sampling method not given in detail<br>- characteristics of respondents not given<br>- No other sources of noise considered, although "traffic noise only type of noise to which residents were exposed"<br>- Selection bias possible: survey sites represented maximum range of |

| Reference<br>(First author, publication year, S/N)<br>Meta-analysis | Study design                | Population                                                                                                                                                                                                                                       | Outcome                                                                               | Exposure                      |                                                                         |                 | Results                                                                                                                                                                                      | Comments<br>(study quality [overall assessment according to SIGN/CASP], conflict of interest [stated vs. not stated], funding [financed from public funds vs. financed from industry], confounding, strengths / weaknesses [potential bias, over- or underestimation of potential effects]) |
|---------------------------------------------------------------------|-----------------------------|--------------------------------------------------------------------------------------------------------------------------------------------------------------------------------------------------------------------------------------------------|---------------------------------------------------------------------------------------|-------------------------------|-------------------------------------------------------------------------|-----------------|----------------------------------------------------------------------------------------------------------------------------------------------------------------------------------------------|---------------------------------------------------------------------------------------------------------------------------------------------------------------------------------------------------------------------------------------------------------------------------------------------|
|                                                                     |                             | Study region<br>Sample population<br>Sample size (M, F, M+F):<br>Age (mean, range)<br>No. of cases / no. of controls or exposed/unexposed<br>Time of recruitment / follow-up (mean, range)<br>Response (%)<br>(baseline minus loss to follow-up) | Disease (ICD-10)<br>Prescription<br>Questionnaire                                     | exposure source               | exposure assessment                                                     | exposure levels |                                                                                                                                                                                              |                                                                                                                                                                                                                                                                                             |
| Klomp maker, 2019, 8746                                             | Cross-sectional<br>National | Study region:<br>Netherlands<br><br>Sample size:<br>M+F=354,827<br>M= 161,045, F=193,782                                                                                                                                                         | Kessler psychological distress scale (K10) using ≥30 to define psych. distress in the | Road 2011<br><br>Railway 2011 | Modelled -> Standard Model<br><br>Instrumentation for Noise Assessments | -               | Prevalence<br><i>Self-reported psychological distress (severe): n = 15,656 (4.7%)</i><br><i>Prescriptions</i><br>Anxiolytics (N05B): n = 7165 (2.0%)<br>Hypnotics and sedatives (N505C): n = | study quality:<br>+<br>Cross-sectional analysis<br>conflict of interest: stated                                                                                                                                                                                                             |

traffic noise level that could be found (45-75 dBA)  
- air particulate level not considered

| Reference<br>(First author, publication year, S/N)<br>Meta-analysis | Study design                                                  | Population                                                                                                                                                                                                                                                               | Outcome                                                                                                                              | Exposure                                                                                      |                                                                                                                                                                                                                                                                                                                                                                                                                               |                                                                                                                                                                                                                                               | Results | Comments<br>(study quality [overall assessment according to SIGN/CASP], conflict of interest [stated vs. not stated], funding [financed from public funds vs. financed from industry], confounding, strengths / weaknesses [potential bias, over- or underestimation of potential effects]) |
|---------------------------------------------------------------------|---------------------------------------------------------------|--------------------------------------------------------------------------------------------------------------------------------------------------------------------------------------------------------------------------------------------------------------------------|--------------------------------------------------------------------------------------------------------------------------------------|-----------------------------------------------------------------------------------------------|-------------------------------------------------------------------------------------------------------------------------------------------------------------------------------------------------------------------------------------------------------------------------------------------------------------------------------------------------------------------------------------------------------------------------------|-----------------------------------------------------------------------------------------------------------------------------------------------------------------------------------------------------------------------------------------------|---------|---------------------------------------------------------------------------------------------------------------------------------------------------------------------------------------------------------------------------------------------------------------------------------------------|
|                                                                     |                                                               | Study region<br>Sample population<br>Sample size (M, F, M+F):<br>Age (mean, range)<br>No. of cases / no. of controls or exposed/unexposed<br>Time of recruitment / follow-up (mean, range)<br>Response (%)<br>(baseline minus loss to follow-up)                         | Disease (ICD-10)<br>Prescription<br>Questionnaire                                                                                    | exposure source                                                                               | exposure assessment                                                                                                                                                                                                                                                                                                                                                                                                           | exposure levels                                                                                                                                                                                                                               |         |                                                                                                                                                                                                                                                                                             |
|                                                                     | Health Survey with secondary data on prescription medications | Sample population:<br>Sample based on data from national health survey (Public Health Monitor)<br><br>Age:<br>19-39 years: n = 68,940<br>40-64 years: n = 134,161<br>≥65 years: n = 151,726 (≥65 oversampled as part of study design)<br><br>No. of cases<br>See results | past 30 days<br><br>Prescriptions in 2012 (ATC code)<br>Anxiolytics (N05B)<br>Hypnotics & sedatives (N05C)<br>Antidepressants (N06A) | (STAMINA)<br>spatial resolution varied between 10x10m (close to source) to 80x80m<br><br>LDEN | 4346 (1.2%)<br>Antidepressants: n = 25,748 (7.3%)<br><br>Road traffic noise per 7.5 dB (IQR):<br>Psychological distress: OR = 1.00 (95% CI 0.98-1.03)<br>Anxiolytics: OR = 1.07 (95% CI 1.03-1.11)<br>Hypnotics and sedatives: OR = 1.01 (95% CI 0.97-1.06)<br>Antidepressants: OR = 0.99 (95% CI 0.97-1.01)<br><br><i>Models adjusted for air pollution</i><br>NO <sub>2</sub> -> lower risk estimates (all non-significant) | funding: stated<br>confounding (controlled for): sex, age, marital status, region of origin, education, paid occupation, household income, neighborhood SES, smoking status, alcohol use and degree of urbanization<br>strengths, weaknesses: |         |                                                                                                                                                                                                                                                                                             |

| Reference<br>(First author, publication year, S/N)<br>Meta-analysis | Population   |                                                                                                                                                                                                                                                  | Outcome                                           | Exposure        |                     |                 | Results                                                                                                                                                                                                                                                                                                                                                                                                                                          | Comments<br>(study quality [overall assessment according to SIGN/CASP], conflict of interest [stated vs. not stated], funding [financed from public funds vs. financed from industry], confounding, strengths / weaknesses [potential bias, over- or underestimation of potential effects]) |
|---------------------------------------------------------------------|--------------|--------------------------------------------------------------------------------------------------------------------------------------------------------------------------------------------------------------------------------------------------|---------------------------------------------------|-----------------|---------------------|-----------------|--------------------------------------------------------------------------------------------------------------------------------------------------------------------------------------------------------------------------------------------------------------------------------------------------------------------------------------------------------------------------------------------------------------------------------------------------|---------------------------------------------------------------------------------------------------------------------------------------------------------------------------------------------------------------------------------------------------------------------------------------------|
|                                                                     | Study design | Study region<br>Sample population<br>Sample size (M, F, M+F):<br>Age (mean, range)<br>No. of cases / no. of controls or exposed/unexposed<br>Time of recruitment / follow-up (mean, range)<br>Response (%)<br>(baseline minus loss to follow-up) | Disease (ICD-10)<br>Prescription<br>Questionnaire | exposure source | exposure assessment | exposure levels |                                                                                                                                                                                                                                                                                                                                                                                                                                                  |                                                                                                                                                                                                                                                                                             |
|                                                                     |              | Time of recruitment<br>2012<br><br>Response: 47%                                                                                                                                                                                                 |                                                   |                 |                     |                 | PM <sub>2.5</sub> -> similar risk estimates (nearly all significant)<br><br>Railway noise per 8.9 dB (IQR):<br>Psychological distress: OR = 1.04 (95% CI 1.02-1.06)<br>Anxiolytics: OR = 1.01 (95% CI 0.98-1.04)<br>Hypnotics and sedatives: OR = 0.99 (95% CI 0.95-1.03)<br>Antidepressants: OR = 0.99 (95% CI 0.97-1.00)<br><br><i>Models adjusted for air pollution</i><br>NO <sub>2</sub> -> similar risk estimates (psychological distress) | -Cross-sectional analysis within longitudinal study, with basic information about chronology between exposition and outcome<br><br>+ adequate definition and assessment of outcome<br>+adequate control for confounders (including consideration of air                                     |



| Reference<br>(First author, publication year, S/N)<br>Meta-analysis | Study design                                                        | Population                                                                                                                                                                                                                                       | Outcome                                                                | Exposure                                 |                     |                                                                                    | Results                                                                                                                                                                                                                                                                                                                                                                                                                                                                                   | Comments<br>(study quality [overall assessment according to SIGN/CASP], conflict of interest [stated vs. not stated], funding [financed from public funds vs. financed from industry], confounding, strengths / weaknesses [potential bias, over- or underestimation of potential effects]) |   |    |        |       |      |   |  |       |      |      |           |       |      |      |           |       |     |      |           |      |     |      |           |  |
|---------------------------------------------------------------------|---------------------------------------------------------------------|--------------------------------------------------------------------------------------------------------------------------------------------------------------------------------------------------------------------------------------------------|------------------------------------------------------------------------|------------------------------------------|---------------------|------------------------------------------------------------------------------------|-------------------------------------------------------------------------------------------------------------------------------------------------------------------------------------------------------------------------------------------------------------------------------------------------------------------------------------------------------------------------------------------------------------------------------------------------------------------------------------------|---------------------------------------------------------------------------------------------------------------------------------------------------------------------------------------------------------------------------------------------------------------------------------------------|---|----|--------|-------|------|---|--|-------|------|------|-----------|-------|------|------|-----------|-------|-----|------|-----------|------|-----|------|-----------|--|
|                                                                     |                                                                     | Study region<br>Sample population<br>Sample size (M, F, M+F):<br>Age (mean, range)<br>No. of cases / no. of controls or exposed/unexposed<br>Time of recruitment / follow-up (mean, range)<br>Response (%)<br>(baseline minus loss to follow-up) | Disease (ICD-10)<br>Prescription<br>Questionnaire                      | exposure source                          | exposure assessment | exposure levels                                                                    |                                                                                                                                                                                                                                                                                                                                                                                                                                                                                           |                                                                                                                                                                                                                                                                                             |   |    |        |       |      |   |  |       |      |      |           |       |      |      |           |       |     |      |           |      |     |      |           |  |
|                                                                     |                                                                     |                                                                                                                                                                                                                                                  |                                                                        |                                          |                     |                                                                                    | PM <sub>2.5</sub> -> higher risk estimates (all significant)                                                                                                                                                                                                                                                                                                                                                                                                                              | particulate levels<br>+ adequate exposure assessment                                                                                                                                                                                                                                        |   |    |        |       |      |   |  |       |      |      |           |       |      |      |           |       |     |      |           |      |     |      |           |  |
| Leijssen, 2019, 8650                                                | Cross-sectional<br><br>HELI US study<br>(Healthy Life in Amsterdam) | Study region:<br>Amsterdam (Netherlands)<br><br>Sample size:<br>M+F= 23,293<br>M= 9,920, F= 13,373<br><br>Sample population:<br>Random sample drawn from municipal population register                                                           | Outcome:<br>depressed mood<br><br>Patient Health Questionnaire (PHQ-9) | road traffic noise<br><br>data from 2011 |                     | L <sub>eq,24h</sub><br><br>45-54 dB<br>55-59 dB<br>60-64 dB<br>65-69 dB<br>≥ 70 dB | Table 3: OR noise and depressed mood (Model C)                                                                                                                                                                                                                                                                                                                                                                                                                                            | study quality:<br>-(to +)<br>cross-sectional analysis<br>conflict of interest:<br>stated (none)<br>funding:<br>stated (by Academic Medical Center Amsterdam, Public Health Service of                                                                                                       |   |    |        |       |      |   |  |       |      |      |           |       |      |      |           |       |     |      |           |      |     |      |           |  |
|                                                                     |                                                                     |                                                                                                                                                                                                                                                  |                                                                        |                                          |                     |                                                                                    | <table border="1"> <thead> <tr> <th>dB</th> <th>%</th> <th>OR</th> <th>95% CI</th> </tr> </thead> <tbody> <tr> <td>45-54</td> <td>30.9</td> <td>1</td> <td></td> </tr> <tr> <td>55-59</td> <td>46.6</td> <td>0.94</td> <td>0.84-1.06</td> </tr> <tr> <td>60-64</td> <td>16.4</td> <td>0.82</td> <td>0.70-0.97</td> </tr> <tr> <td>65-69</td> <td>4.7</td> <td>1.07</td> <td>0.85-1.36</td> </tr> <tr> <td>≥ 70</td> <td>1.2</td> <td>1.65</td> <td>1.10-2.48</td> </tr> </tbody> </table> | dB                                                                                                                                                                                                                                                                                          | % | OR | 95% CI | 45-54 | 30.9 | 1 |  | 55-59 | 46.6 | 0.94 | 0.84-1.06 | 60-64 | 16.4 | 0.82 | 0.70-0.97 | 65-69 | 4.7 | 1.07 | 0.85-1.36 | ≥ 70 | 1.2 | 1.65 | 1.10-2.48 |  |
| dB                                                                  | %                                                                   | OR                                                                                                                                                                                                                                               | 95% CI                                                                 |                                          |                     |                                                                                    |                                                                                                                                                                                                                                                                                                                                                                                                                                                                                           |                                                                                                                                                                                                                                                                                             |   |    |        |       |      |   |  |       |      |      |           |       |      |      |           |       |     |      |           |      |     |      |           |  |
| 45-54                                                               | 30.9                                                                | 1                                                                                                                                                                                                                                                |                                                                        |                                          |                     |                                                                                    |                                                                                                                                                                                                                                                                                                                                                                                                                                                                                           |                                                                                                                                                                                                                                                                                             |   |    |        |       |      |   |  |       |      |      |           |       |      |      |           |       |     |      |           |      |     |      |           |  |
| 55-59                                                               | 46.6                                                                | 0.94                                                                                                                                                                                                                                             | 0.84-1.06                                                              |                                          |                     |                                                                                    |                                                                                                                                                                                                                                                                                                                                                                                                                                                                                           |                                                                                                                                                                                                                                                                                             |   |    |        |       |      |   |  |       |      |      |           |       |      |      |           |       |     |      |           |      |     |      |           |  |
| 60-64                                                               | 16.4                                                                | 0.82                                                                                                                                                                                                                                             | 0.70-0.97                                                              |                                          |                     |                                                                                    |                                                                                                                                                                                                                                                                                                                                                                                                                                                                                           |                                                                                                                                                                                                                                                                                             |   |    |        |       |      |   |  |       |      |      |           |       |      |      |           |       |     |      |           |      |     |      |           |  |
| 65-69                                                               | 4.7                                                                 | 1.07                                                                                                                                                                                                                                             | 0.85-1.36                                                              |                                          |                     |                                                                                    |                                                                                                                                                                                                                                                                                                                                                                                                                                                                                           |                                                                                                                                                                                                                                                                                             |   |    |        |       |      |   |  |       |      |      |           |       |      |      |           |       |     |      |           |      |     |      |           |  |
| ≥ 70                                                                | 1.2                                                                 | 1.65                                                                                                                                                                                                                                             | 1.10-2.48                                                              |                                          |                     |                                                                                    |                                                                                                                                                                                                                                                                                                                                                                                                                                                                                           |                                                                                                                                                                                                                                                                                             |   |    |        |       |      |   |  |       |      |      |           |       |      |      |           |       |     |      |           |      |     |      |           |  |

| Reference<br>(First author, publication year, S/N)<br>Meta-analysis | Study design   | Population                                                                                                                                                                                                                                                                                                             | Outcome                                           | Exposure        |                     |                 | Results                                                                                                                                                                               | Comments<br>(study quality [overall assessment according to SIGN/CASP], conflict of interest [stated vs. not stated], funding [financed from public funds vs. financed from industry], confounding, strengths / weaknesses [potential bias, over- or underestimation of potential effects]) |
|---------------------------------------------------------------------|----------------|------------------------------------------------------------------------------------------------------------------------------------------------------------------------------------------------------------------------------------------------------------------------------------------------------------------------|---------------------------------------------------|-----------------|---------------------|-----------------|---------------------------------------------------------------------------------------------------------------------------------------------------------------------------------------|---------------------------------------------------------------------------------------------------------------------------------------------------------------------------------------------------------------------------------------------------------------------------------------------|
|                                                                     |                | Study region<br>Sample population<br>Sample size (M, F, M+F):<br>Age (mean, range)<br>No. of cases / no. of controls or exposed/unexposed<br>Time of recruitment / follow-up (mean, range)<br>Response (%)<br>(baseline minus loss to follow-up)                                                                       | Disease (ICD-10)<br>Prescription<br>Questionnaire | exposure source | exposure assessment | exposure levels |                                                                                                                                                                                       |                                                                                                                                                                                                                                                                                             |
|                                                                     | Urban Setting) | Age:<br>Range: 18-70 years<br>Mean: 44 years<br>18-29 years: n=4,425<br>30-39 years: n=4,215<br>40-49 years: n=5,676<br>50-59 years: n=6,018<br>≥ 60 years: n=2,959<br><br>Time of recruitment:<br>2011-2015<br><br>Response:<br>N=49,952 invited -> n=24,789 (participated) -> 49.6%<br>n=23,293 (full data) -> 46.6% |                                                   |                 |                     |                 | Different sensitivity analyses performed for noise exposure ≥ 65 dB and depressive mood for: ethnicity, educational status, occupational status, age and sex. (results not extracted) | Amsterdam, Dutch Hearth Foundation, Netherlands Organization for Health Research and Development, European Union, European Fund for the Integration of non-EU immigrants) confounding (controlled for): age, sex, ethnic origin, educational level, occupational status, marital status,    |

| Referen<br>ce<br>(First<br>author,<br>publica<br>tion<br>year,<br>S/N)<br>Meta-a<br>nalysis | Population          |                                                                                                                                                                                                                                                           | Outcome                                           | Exposure           |                        |                    | Results | Comments<br>(study quality<br>[overall assessment<br>according to<br>SIGN/CASP],<br>conflict of interest<br>[stated vs. not stated],<br>funding [financed<br>from public funds vs.<br>financed from<br>industry],<br>confounding,<br>strengths /<br>weaknesses<br>[potential bias, over-<br>or underestimation of<br>potential effects]) |
|---------------------------------------------------------------------------------------------|---------------------|-----------------------------------------------------------------------------------------------------------------------------------------------------------------------------------------------------------------------------------------------------------|---------------------------------------------------|--------------------|------------------------|--------------------|---------|------------------------------------------------------------------------------------------------------------------------------------------------------------------------------------------------------------------------------------------------------------------------------------------------------------------------------------------|
|                                                                                             | Study<br>desig<br>n | Study region<br>Sample population<br>Sample size (M, F, M+F):<br>Age (mean, range)<br>No. of cases / no. of controls<br>or exposed/unexposed<br>Time of recruitment /<br>follow-up (mean, range)<br>Response (%)<br>(baseline minus loss to<br>follow-up) | Disease (ICD-10)<br>Prescription<br>Questionnaire | exposure<br>source | exposure<br>assessment | exposure<br>levels |         |                                                                                                                                                                                                                                                                                                                                          |
|                                                                                             |                     |                                                                                                                                                                                                                                                           |                                                   |                    |                        |                    |         | household<br>composition,<br>neuroticism, stressful<br>life events,<br>socioeconomic status,<br>blue/ green space and<br>liveability<br>strengths,<br>weaknesses:<br>-Cross-sectional<br>study, with basic<br>information about<br>chronology between<br>exposition and<br>outcome<br>+ random sample                                    |

| Reference<br>(First author, publication year, S/N)<br>Meta-analysis | Study design | Population                                                                                                                                                                                                                                       | Outcome                                           | Exposure        |                     |                 | Results                                | Comments<br>(study quality [overall assessment according to SIGN/CASP], conflict of interest [stated vs. not stated], funding [financed from public funds vs. financed from industry], confounding, strengths / weaknesses [potential bias, over- or underestimation of potential effects]) |
|---------------------------------------------------------------------|--------------|--------------------------------------------------------------------------------------------------------------------------------------------------------------------------------------------------------------------------------------------------|---------------------------------------------------|-----------------|---------------------|-----------------|----------------------------------------|---------------------------------------------------------------------------------------------------------------------------------------------------------------------------------------------------------------------------------------------------------------------------------------------|
|                                                                     |              | Study region<br>Sample population<br>Sample size (M, F, M+F):<br>Age (mean, range)<br>No. of cases / no. of controls or exposed/unexposed<br>Time of recruitment / follow-up (mean, range)<br>Response (%)<br>(baseline minus loss to follow-up) | Disease (ICD-10)<br>Prescription<br>Questionnaire | exposure source | exposure assessment | exposure levels |                                        |                                                                                                                                                                                                                                                                                             |
| Lercher                                                             | Cross-       | Study region:                                                                                                                                                                                                                                    | Tranquilizers                                     | Road            | L <sub>eq</sub>     | <55 dB          | Table 1: Noise level and prescriptions | study quality:<br>+ adequate definition and assessment of outcome<br>+adequate control for confounders<br>+ adequate exposure assessment<br>+ high statistical power<br>+ ethics approval (by Institutional Review Board of the Academic Medical Center, University of Amsterdam)           |

| Reference<br>(First author, publication year, S/N)<br>Meta-analysis | Study design    | Population                                                                                                                                                                                                                                       | Outcome                                                                                                                                              | Exposure        |                                         |                     | Results                                       | Comments<br>(study quality [overall assessment according to SIGN/CASP], conflict of interest [stated vs. not stated], funding [financed from public funds vs. financed from industry], confounding, strengths / weaknesses [potential bias, over- or underestimation of potential effects]) |
|---------------------------------------------------------------------|-----------------|--------------------------------------------------------------------------------------------------------------------------------------------------------------------------------------------------------------------------------------------------|------------------------------------------------------------------------------------------------------------------------------------------------------|-----------------|-----------------------------------------|---------------------|-----------------------------------------------|---------------------------------------------------------------------------------------------------------------------------------------------------------------------------------------------------------------------------------------------------------------------------------------------|
|                                                                     |                 | Study region<br>Sample population<br>Sample size (M, F, M+F):<br>Age (mean, range)<br>No. of cases / no. of controls or exposed/unexposed<br>Time of recruitment / follow-up (mean, range)<br>Response (%)<br>(baseline minus loss to follow-up) | Disease (ICD-10)<br>Prescription<br>Questionnaire                                                                                                    | exposure source | exposure assessment                     | exposure levels     |                                               |                                                                                                                                                                                                                                                                                             |
| , P. 1996, H-2891, Austria -                                        | sectional study | 5 rural communities along 2 major traffic routes in the Austrian part of the Alps<br><br>Sample population:<br>No information about sampling<br><br>Sample size:<br>M+F=1989<br><br>Age:<br>25-65 years<br><br>Exposed/unexposed:<br>NA          | Self-reported prescriptions (questionnaire)<br><br>Five-grade frequency response scale:<br><once/month, once/month, once/fortnight, once/week, daily | traffic         | (long-term and short-term measurements) | (Reference), >55 dB | (OR 95% CI)<br>Tranquilizer: 1.13 (0.60-2.13) | - (to --)<br>Cross-sectional study design<br><br>conflict of interest: not stated<br><br>funding: not stated<br><br>confounding: adjusted for age, sex and education<br><br>strengths, weaknesses:                                                                                          |

| Reference<br>(First author, publication year, S/N)<br>Meta-analysis | Population   |                                                                                                                                                                                                                                                  | Outcome                                           | Exposure        |                     |                 | Results | Comments<br>(study quality [overall assessment according to SIGN/CASP], conflict of interest [stated vs. not stated], funding [financed from public funds vs. financed from industry], confounding, strengths / weaknesses [potential bias, over- or underestimation of potential effects])                       |
|---------------------------------------------------------------------|--------------|--------------------------------------------------------------------------------------------------------------------------------------------------------------------------------------------------------------------------------------------------|---------------------------------------------------|-----------------|---------------------|-----------------|---------|-------------------------------------------------------------------------------------------------------------------------------------------------------------------------------------------------------------------------------------------------------------------------------------------------------------------|
|                                                                     | Study design | Study region<br>Sample population<br>Sample size (M, F, M+F):<br>Age (mean, range)<br>No. of cases / no. of controls or exposed/unexposed<br>Time of recruitment / follow-up (mean, range)<br>Response (%)<br>(baseline minus loss to follow-up) | Disease (ICD-10)<br>Prescription<br>Questionnaire | exposure source | exposure assessment | exposure levels |         |                                                                                                                                                                                                                                                                                                                   |
|                                                                     |              | Time of recruitment/<br>follow-up: not reported                                                                                                                                                                                                  |                                                   |                 |                     |                 |         | +even response across all noise classes, participants in noise classes comparable in many aspect (except participants in classes >55 dB more likely to have rented home and be younger (1.2 years)); exposed did not differ in potential confounders<br>- unclear exposure measurement, or which times it covered |

| Reference<br>(First author, publication year, S/N)<br>Meta-analysis | Population   |                                                                                                                                                                                                                                                  | Outcome                                           | Exposure        |                     |                 | Results | Comments<br>(study quality [overall assessment according to SIGN/CASP], conflict of interest [stated vs. not stated], funding [financed from public funds vs. financed from industry], confounding, strengths / weaknesses [potential bias, over- or underestimation of potential effects])                                                                                           |
|---------------------------------------------------------------------|--------------|--------------------------------------------------------------------------------------------------------------------------------------------------------------------------------------------------------------------------------------------------|---------------------------------------------------|-----------------|---------------------|-----------------|---------|---------------------------------------------------------------------------------------------------------------------------------------------------------------------------------------------------------------------------------------------------------------------------------------------------------------------------------------------------------------------------------------|
|                                                                     | Study design | Study region<br>Sample population<br>Sample size (M, F, M+F):<br>Age (mean, range)<br>No. of cases / no. of controls or exposed/unexposed<br>Time of recruitment / follow-up (mean, range)<br>Response (%)<br>(baseline minus loss to follow-up) | Disease (ICD-10)<br>Prescription<br>Questionnaire | exposure source | exposure assessment | exposure levels |         |                                                                                                                                                                                                                                                                                                                                                                                       |
|                                                                     |              |                                                                                                                                                                                                                                                  |                                                   |                 |                     |                 |         | <ul style="list-style-type: none"> <li>- no information on sampling</li> <li>-cross-sectional</li> <li>-missing info about participant numbers in general categories and noise classes</li> <li>-self-reported drug prescriptions as outcome</li> <li>- no consideration of other important confounders (i.e. air pollution)</li> <li>- no other noise exposure considered</li> </ul> |

| Reference<br>(First author, publication year, S/N)<br>Meta-analysis | Study design                 | Population                                                                                                                                                                                                                                       | Outcome                                                                                                                                                          | Exposure        |                                                                                                                                                                                                                             |                                                                                                   | Results                                                                                                                                                                                                                                                                                                               | Comments<br>(study quality [overall assessment according to SIGN/CASP], conflict of interest [stated vs. not stated], funding [financed from public funds vs. financed from industry], confounding, strengths / weaknesses [potential bias, over- or underestimation of potential effects]) |
|---------------------------------------------------------------------|------------------------------|--------------------------------------------------------------------------------------------------------------------------------------------------------------------------------------------------------------------------------------------------|------------------------------------------------------------------------------------------------------------------------------------------------------------------|-----------------|-----------------------------------------------------------------------------------------------------------------------------------------------------------------------------------------------------------------------------|---------------------------------------------------------------------------------------------------|-----------------------------------------------------------------------------------------------------------------------------------------------------------------------------------------------------------------------------------------------------------------------------------------------------------------------|---------------------------------------------------------------------------------------------------------------------------------------------------------------------------------------------------------------------------------------------------------------------------------------------|
|                                                                     |                              | Study region<br>Sample population<br>Sample size (M, F, M+F):<br>Age (mean, range)<br>No. of cases / no. of controls or exposed/unexposed<br>Time of recruitment / follow-up (mean, range)<br>Response (%)<br>(baseline minus loss to follow-up) | Disease (ICD-10)<br>Prescription<br>Questionnaire                                                                                                                | exposure source | exposure assessment                                                                                                                                                                                                         | exposure levels                                                                                   |                                                                                                                                                                                                                                                                                                                       |                                                                                                                                                                                                                                                                                             |
| Linares, C., 2017, 1515, Spain -                                    | Ecological time-series study | Study region:<br>Madrid<br><br>Sample population:<br>Population of Madrid<br><br>Sample size:<br>M+F=3,116,897 (Madrid population)<br>M+F= 754,005 (≥ 60 years)<br><br>Age:<br>No information                                                    | ICD-9: hospital admissions:<br>290: Dementias (290.0-290.2, 290.4-290.9)<br><br>294.1-294:<br>Persistent mental disorders due to conditions classified elsewhere | Road traffic    | L <sub>D</sub> (08-22h)<br>L <sub>N</sub> (22-08h)<br><br>Collected from 27 urban stations spread across Madrid<br><br>Year 2009?<br><br>(PM <sub>2.5</sub> , PM <sub>10</sub> , O <sub>3</sub> , NO <sub>2</sub> assessed) | Continuous<br><br>Leq,D:<br>Range:<br>59.4 (Min)-69 (Max)<br><br>L <sub>N</sub> :<br>55.0-67.2 dB | Linear relationship between Leq,D and number of daily dementia-related emergency (DDE): R = 0.918, p < 0.001<br><br>Calculation of RR for 1dB increase in L <sub>D</sub><br>RR for 1 dB(A) increase in L <sub>D</sub> (from Table 2)<br><br>RR (95% CI)<br>Tcal (lag 1): 1.19 (1.09-1.30)<br><br>Daily<br>Dementia-re | study quality:<br>- (to --)<br><br>conflict of interest:<br>not stated<br><br>funding:<br>Miguel Servet type 1 grant, FIS Project ENPY<br><br>confounding (controlled):<br>time trend,                                                                                                      |



| Reference<br>(First author, publication year, S/N)<br>Meta-analysis | Study design | Population                                                                                                                                                                                                                                                       | Outcome                                           | Exposure        |                     |                           | Results                                                         | Comments<br>(study quality [overall assessment according to SIGN/CASP], conflict of interest [stated vs. not stated], funding [financed from public funds vs. financed from industry], confounding, strengths / weaknesses [potential bias, over- or underestimation of potential effects]) |
|---------------------------------------------------------------------|--------------|------------------------------------------------------------------------------------------------------------------------------------------------------------------------------------------------------------------------------------------------------------------|---------------------------------------------------|-----------------|---------------------|---------------------------|-----------------------------------------------------------------|---------------------------------------------------------------------------------------------------------------------------------------------------------------------------------------------------------------------------------------------------------------------------------------------|
|                                                                     |              | Study region<br>Sample population<br>Sample size (M, F, M+F):<br>Age (mean, range)<br>No. of cases / no. of controls or exposed/unexposed<br>Time of recruitment / follow-up (mean, range)<br>Response (%)<br>(baseline minus loss to follow-up)                 | Disease (ICD-10)<br>Prescription<br>Questionnaire | exposure source | exposure assessment | exposure levels           |                                                                 |                                                                                                                                                                                                                                                                                             |
|                                                                     |              | No of cases/ no of controls:<br>n = 3,287 (daily dementia-related hospital admissions, Table 1)<br>n= 1,175 dementia admissions (Abstract/ Result text)<br><br>Time of recruitment/ follow-up: January 2001 to December 31, 2009<br><br>Response: No information |                                                   |                 |                     | lated hospital admissions | Teqd (lag 0): 1.15 (1.11-1.20)<br>O3a (lag 5): 1.09 (1.04-1.15) | seasonality, autoregression, day of the week<br><br>strengths, weaknesses:<br>-ecological study<br>- very rough estimation of exposure and very little variation in mean noise exposure levels<br>-Missing information on population and characteristics                                    |

| Referen<br>ce<br>(First<br>author,<br>publica<br>tion<br>year,<br>S/N)<br>Meta-a<br>nalysis | Study<br>desig<br>n | Population                                                                                                                                                                                                                                                | Outcome                                           | Exposure           |                        |                    | Results                                              | Comments<br>(study quality<br>[overall assessment<br>according to<br>SIGN/CASP],<br>conflict of interest<br>[stated vs. not stated],<br>funding [financed<br>from public funds vs.<br>financed from<br>industry],<br>confounding,<br>strengths /<br>weaknesses<br>[potential bias, over-<br>or underestimation of<br>potential effects]) |
|---------------------------------------------------------------------------------------------|---------------------|-----------------------------------------------------------------------------------------------------------------------------------------------------------------------------------------------------------------------------------------------------------|---------------------------------------------------|--------------------|------------------------|--------------------|------------------------------------------------------|------------------------------------------------------------------------------------------------------------------------------------------------------------------------------------------------------------------------------------------------------------------------------------------------------------------------------------------|
|                                                                                             |                     | Study region<br>Sample population<br>Sample size (M, F, M+F):<br>Age (mean, range)<br>No. of cases / no. of controls<br>or exposed/unexposed<br>Time of recruitment /<br>follow-up (mean, range)<br>Response (%)<br>(baseline minus loss to<br>follow-up) | Disease (ICD-10)<br>Prescription<br>Questionnaire | exposure<br>source | exposure<br>assessment | exposure<br>levels |                                                      |                                                                                                                                                                                                                                                                                                                                          |
| Meecha<br>&                                                                                 | Cross-<br>sectio    | Study region:<br>Vicinity of Los Angeles                                                                                                                                                                                                                  | Mental hospital<br>admissions                     | Aircraft<br>noise  | MNA<br>(maximum        |                    | Mental health admissions for eight<br>months in 1971 | Study quality<br>- (to --)                                                                                                                                                                                                                                                                                                               |

- Dementia-related hospital admissions -> does not reflect the prevalence of dementia in Madrid  
- linkage between noise and hospital admissions  
- possible under-recording of emergencies  
- no other noise exposure considered

| Referen<br>ce<br>(First<br>author,<br>publica<br>tion<br>year,<br>S/N)<br>Meta-a<br>nalysis | Study<br>desig<br>n | Population                                                                                                                                                                                                                                                                                       | Outcome                                           | Exposure                                                                      |                        |                    | Results                                                                                                          | Comments<br>(study quality<br>[overall assessment<br>according to<br>SIGN/CASP],<br>conflict of interest<br>[stated vs. not stated],<br>funding [financed<br>from public funds vs.<br>financed from<br>industry],<br>confounding,<br>strengths /<br>weaknesses<br>[potential bias, over-<br>or underestimation of<br>potential effects]) |
|---------------------------------------------------------------------------------------------|---------------------|--------------------------------------------------------------------------------------------------------------------------------------------------------------------------------------------------------------------------------------------------------------------------------------------------|---------------------------------------------------|-------------------------------------------------------------------------------|------------------------|--------------------|------------------------------------------------------------------------------------------------------------------|------------------------------------------------------------------------------------------------------------------------------------------------------------------------------------------------------------------------------------------------------------------------------------------------------------------------------------------|
|                                                                                             |                     | Study region<br>Sample population<br>Sample size (M, F, M+F):<br>Age (mean, range)<br>No. of cases / no. of controls<br>or exposed/unexposed<br>Time of recruitment /<br>follow-up (mean, range)<br>Response (%)<br>(baseline minus loss to<br>follow-up)                                        | Disease (ICD-10)<br>Prescription<br>Questionnaire | exposure<br>source                                                            | exposure<br>assessment | exposure<br>levels |                                                                                                                  |                                                                                                                                                                                                                                                                                                                                          |
| Smith,<br>1977,<br>1679<br>USA<br>-                                                         | nal<br>study        | Airport<br><br>Study population<br>Population in MNA<br>compared to population in<br>control area (nearby city of El<br>Segundo with noise levels<br>below 90dBA levels of MNA)<br><br>Sample size:<br>M+F= 137,331<br><br>Age<br>Median age unexposed area=<br>32 years<br>Median age MNA area= | in South Bay<br>Mental Health<br>Service          | noise area) 90<br>dB and higher<br><br>Determined<br>with census<br>tract map |                        |                    | MNA<br>Control<br>76<br>32<br>128<br>99<br>p-value chi-sq test=0.10<br>29% increase in admissions in MNA<br>area | Conflict of interest<br>Not stated<br><br>Funding<br>Not stated<br><br>Confounding<br>Apparently no<br>adjustment for<br>confounders<br><br>Strengths/<br>weaknesses:<br>+ large sample size<br>- No adjustment for                                                                                                                      |

| Reference<br>(First author, publication year, S/N)<br>Meta-analysis | Study design | Population                                                                                                                                                                                                                                       | Outcome                                           | Exposure        |                     |                 | Results | Comments<br>(study quality [overall assessment according to SIGN/CASP], conflict of interest [stated vs. not stated], funding [financed from public funds vs. financed from industry], confounding, strengths / weaknesses [potential bias, over- or underestimation of potential effects])          |
|---------------------------------------------------------------------|--------------|--------------------------------------------------------------------------------------------------------------------------------------------------------------------------------------------------------------------------------------------------|---------------------------------------------------|-----------------|---------------------|-----------------|---------|------------------------------------------------------------------------------------------------------------------------------------------------------------------------------------------------------------------------------------------------------------------------------------------------------|
|                                                                     |              | Study region<br>Sample population<br>Sample size (M, F, M+F):<br>Age (mean, range)<br>No. of cases / no. of controls or exposed/unexposed<br>Time of recruitment / follow-up (mean, range)<br>Response (%)<br>(baseline minus loss to follow-up) | Disease (ICD-10)<br>Prescription<br>Questionnaire | exposure source | exposure assessment | exposure levels |         |                                                                                                                                                                                                                                                                                                      |
|                                                                     |              | 27 years<br><br>Exposed/Unexposed<br>In control area<br>M+F=48,330<br>In exposed area<br>M+F=89,001<br><br>Time of recruitment:<br>8 months in 1971<br><br>Response (%)<br>NA                                                                    |                                                   |                 |                     |                 |         | confounders, except indirectly for SES (two areas were chosen for equal SES)<br>- all covariates, including noise exposure, ecological measurements<br>- Temporal relationship cannot be established<br>- low income area (generalizability)<br>- potential underestimation of the effect: "In cases |

| Reference<br>(First author, publication year, S/N)<br>Meta-analysis | Study design          | Population                                                                                                                                                                                                                                       | Outcome                                                                      | Exposure        |                                                    |                                     | Results                                                                                                                                                                                     | Comments<br>(study quality [overall assessment according to SIGN/CASP], conflict of interest [stated vs. not stated], funding [financed from public funds vs. financed from industry], confounding, strengths / weaknesses [potential bias, over- or underestimation of potential effects]) |
|---------------------------------------------------------------------|-----------------------|--------------------------------------------------------------------------------------------------------------------------------------------------------------------------------------------------------------------------------------------------|------------------------------------------------------------------------------|-----------------|----------------------------------------------------|-------------------------------------|---------------------------------------------------------------------------------------------------------------------------------------------------------------------------------------------|---------------------------------------------------------------------------------------------------------------------------------------------------------------------------------------------------------------------------------------------------------------------------------------------|
|                                                                     |                       | Study region<br>Sample population<br>Sample size (M, F, M+F):<br>Age (mean, range)<br>No. of cases / no. of controls or exposed/unexposed<br>Time of recruitment / follow-up (mean, range)<br>Response (%)<br>(baseline minus loss to follow-up) | Disease (ICD-10)<br>Prescription<br>Questionnaire                            | exposure source | exposure assessment                                | exposure levels                     |                                                                                                                                                                                             |                                                                                                                                                                                                                                                                                             |
| Miyakawa, M. 2007, H-2884, Japan No (no                             | Cross-sectional study | Study region:<br>Narita International airport, Japan<br><br>Sample population:<br>all residents using a leave and                                                                                                                                | Psychiatric disorder measured by GHQ-28 Japanese version, cut off 6 = having | Aircraft        | L <sub>DEN</sub><br>Exposure measurement from 2001 | Exposed: range: 55-65 dB, 2 subgrou | ORs for psychiatric disorders for L <sub>DEN</sub> (reference category: control group) (personal communication) 55-59 dB(A): OR: 1.79 (95 % CI: 0.837-3.85) 59-65 dB(A): OR: 2.22 (95 % CI: | study quality:<br>-<br>Cross-sectional study design<br><br>conflict of interest:                                                                                                                                                                                                            |

where the contour did not fully enclose the tract, we nevertheless used the population of the entire tract,...”]  
- no other noise exposure considered  
- air particulate level not considered

| Referen<br>ce<br>(First<br>author,<br>publica<br>tion<br>year,<br>S/N)<br>Meta-a<br>nalysis | Study<br>desig<br>n | Population                                                                                                                                                                                                                                                     | Outcome                                           | Exposure           |                        |                              | Results     | Comments<br>(study quality<br>[overall assessment<br>according to<br>SIGN/CASP],<br>conflict of interest<br>[stated vs. not stated],<br>funding [financed<br>from public funds vs.<br>financed from<br>industry],<br>confounding,<br>strengths /<br>weaknesses<br>[potential bias, over-<br>or underestimation of<br>potential effects]) |
|---------------------------------------------------------------------------------------------|---------------------|----------------------------------------------------------------------------------------------------------------------------------------------------------------------------------------------------------------------------------------------------------------|---------------------------------------------------|--------------------|------------------------|------------------------------|-------------|------------------------------------------------------------------------------------------------------------------------------------------------------------------------------------------------------------------------------------------------------------------------------------------------------------------------------------------|
|                                                                                             |                     | Study region<br>Sample population<br>Sample size (M, F, M+F):<br>Age (mean, range)<br>No. of cases / no. of controls<br>or exposed/unexposed<br>Time of recruitment /<br>follow-up (mean, range)<br>Response (%)<br>(baseline minus loss to<br>follow-up)      | Disease (ICD-10)<br>Prescription<br>Questionnaire | exposure<br>source | exposure<br>assessment | exposure<br>levels           |             |                                                                                                                                                                                                                                                                                                                                          |
| exposur<br>e for<br>control<br>group)                                                       |                     | pick up method<br><br>Sample size:<br>M+F= 188<br>M= 101, F= 87<br><br>Age:<br>20-39 years: 35<br>40-59 years: 102<br>60-79 years: 51<br><br>No. of cases/ no. of controls:<br>Exposed:<br>Subsample M+F= 113<br>(M=61, F= 52)<br>two groups of the subsample: | a psychiatric<br>disorder                         |                    |                        | ps:<br>55-59 dB,<br>59-65 dB | 0.989-4.97) | not stated<br><br>funding:<br>stated (Grand-in<br>Aid)→ public funding<br><br>confounding<br>(adjusted for):<br>sex, age, occupation of<br>householder,<br>interaction between<br>sex and age<br><br>strengths,<br>weaknesses:<br>+ multiple logistic                                                                                    |

| Referen<br>ce<br>(First<br>author,<br>publica<br>tion<br>year,<br>S/N)<br>Meta-a<br>nalysis | Study<br>desig<br>n | Population                                                                                                                                                                                                                                                | Outcome                                           | Exposure           |                        |                    | Results                                                                                                                                                                                                                                                                                          | Comments<br>(study quality<br>[overall assessment<br>according to<br>SIGN/CASP],<br>conflict of interest<br>[stated vs. not stated],<br>funding [financed<br>from public funds vs.<br>financed from<br>industry],<br>confounding,<br>strengths /<br>weaknesses<br>[potential bias, over-<br>or underestimation of<br>potential effects]) |
|---------------------------------------------------------------------------------------------|---------------------|-----------------------------------------------------------------------------------------------------------------------------------------------------------------------------------------------------------------------------------------------------------|---------------------------------------------------|--------------------|------------------------|--------------------|--------------------------------------------------------------------------------------------------------------------------------------------------------------------------------------------------------------------------------------------------------------------------------------------------|------------------------------------------------------------------------------------------------------------------------------------------------------------------------------------------------------------------------------------------------------------------------------------------------------------------------------------------|
|                                                                                             |                     | Study region<br>Sample population<br>Sample size (M, F, M+F):<br>Age (mean, range)<br>No. of cases / no. of controls<br>or exposed/unexposed<br>Time of recruitment /<br>follow-up (mean, range)<br>Response (%)<br>(baseline minus loss to<br>follow-up) | Disease (ICD-10)<br>Prescription<br>Questionnaire | exposure<br>source | exposure<br>assessment | exposure<br>levels |                                                                                                                                                                                                                                                                                                  |                                                                                                                                                                                                                                                                                                                                          |
|                                                                                             |                     | 55-59 dB: M+F=62 (M=37;<br>F=25)<br>59-65 dB: M+F=51 (M: 24; F:<br>27)<br>Not exposed:<br>M+F= 75 (M= 40; F: 35)<br><br>Time of recruitment/<br>follow-up:<br>2003<br><br>Response:<br>58.2 %<br>Valid response. 37.6%<br>(N=188/500)                     |                                                   |                    |                        |                    | regression models<br>+ exposure<br>measurement<br>instrument<br>+ exposure<br>measurement before<br>survey → chronology<br>+ valid outcome<br>measurement<br>- cross-sectional<br>design<br>- only occupation of<br>householder not<br>socioeconomic status<br>mentioned<br>- no noise value for |                                                                                                                                                                                                                                                                                                                                          |

| Reference<br>(First author, publication year, S/N)<br>Meta-analysis | Study design          | Population                                                                                                                                                                                                                                       | Outcome                                           | Exposure           |                                                                                                        |                                                                       | Results                                                                                                                                                                                                                                             | Comments<br>(study quality [overall assessment according to SIGN/CASP], conflict of interest [stated vs. not stated], funding [financed from public funds vs. financed from industry], confounding, strengths / weaknesses [potential bias, over- or underestimation of potential effects]) |
|---------------------------------------------------------------------|-----------------------|--------------------------------------------------------------------------------------------------------------------------------------------------------------------------------------------------------------------------------------------------|---------------------------------------------------|--------------------|--------------------------------------------------------------------------------------------------------|-----------------------------------------------------------------------|-----------------------------------------------------------------------------------------------------------------------------------------------------------------------------------------------------------------------------------------------------|---------------------------------------------------------------------------------------------------------------------------------------------------------------------------------------------------------------------------------------------------------------------------------------------|
|                                                                     |                       | Study region<br>Sample population<br>Sample size (M, F, M+F):<br>Age (mean, range)<br>No. of cases / no. of controls or exposed/unexposed<br>Time of recruitment / follow-up (mean, range)<br>Response (%)<br>(baseline minus loss to follow-up) | Disease (ICD-10)<br>Prescription<br>Questionnaire | exposure source    | exposure assessment                                                                                    | exposure levels                                                       |                                                                                                                                                                                                                                                     |                                                                                                                                                                                                                                                                                             |
| Nivison, 1993, 1837, Norway (only correlation)                      | Cross sectional study | Study region:<br>Norway, city/area not specified<br><br>Sample size:<br>(94 → 12 excluded due to hearing impairments)<br>M+F= 82<br>M= 35, F= 47                                                                                                 | Anxiety by Spielberger's Trait Anxiety Inventory  | Road traffic noise | Leq, 24h<br>Lmax<br><br>3rd variable formed by combining Leq with number of hours each person reported | Continuous<br><br>Leq, 24h: mean 69 dB, range: 63-72 dB<br>Lmax: mean | Table 1 shows nervous symptoms and Leq, 24h, Lmax, Level x exposure, but only variables with significant F values for R2 change shown. Not significant crude association between nervous symptoms and all three noise exposures (for men and women) | Study quality - (to - -)<br><br>Conflict of interest Not stated<br><br>Funding Public Norwegian National                                                                                                                                                                                    |
|                                                                     |                       |                                                                                                                                                                                                                                                  |                                                   |                    |                                                                                                        |                                                                       | control group given<br>- no other noise exposure considered<br>- air particulate level not considered                                                                                                                                               |                                                                                                                                                                                                                                                                                             |



| Reference<br>(First author, publication year, S/N)<br>Meta-analysis | Study design | Population                                                                                                                                                                                                                                       | Outcome                                           | Exposure                                             |                     |                          | Results                                                                                                                                                                                                                                                                                                                                                                                                                         | Comments<br>(study quality [overall assessment according to SIGN/CASP], conflict of interest [stated vs. not stated], funding [financed from public funds vs. financed from industry], confounding, strengths / weaknesses [potential bias, over- or underestimation of potential effects]) |
|---------------------------------------------------------------------|--------------|--------------------------------------------------------------------------------------------------------------------------------------------------------------------------------------------------------------------------------------------------|---------------------------------------------------|------------------------------------------------------|---------------------|--------------------------|---------------------------------------------------------------------------------------------------------------------------------------------------------------------------------------------------------------------------------------------------------------------------------------------------------------------------------------------------------------------------------------------------------------------------------|---------------------------------------------------------------------------------------------------------------------------------------------------------------------------------------------------------------------------------------------------------------------------------------------|
|                                                                     |              | Study region<br>Sample population<br>Sample size (M, F, M+F):<br>Age (mean, range)<br>No. of cases / no. of controls or exposed/unexposed<br>Time of recruitment / follow-up (mean, range)<br>Response (%)<br>(baseline minus loss to follow-up) | Disease (ICD-10)<br>Prescription<br>Questionnaire | exposure source                                      | exposure assessment | exposure levels          |                                                                                                                                                                                                                                                                                                                                                                                                                                 |                                                                                                                                                                                                                                                                                             |
| coefficients reported, only significant terms reported)             |              | Age<br>Mean:<br>men: 36.1 years<br>women: 44.1 years<br>Range: 19-78 years<br><br>Exposed/unexposed<br>N/A<br><br>Time of recruitment:<br>Not mentioned<br><br>Response (%)<br>56%                                                               |                                                   | spending at home during week (noise exposure/person) |                     | 87.5 dB, range: 80-91 dB | Table 2 shows anxiety and $L_{eq}$ , $L_{max}$ , Level x exposure, but only significant results shown.<br>Anxiety to Level x exposure correlation coeff: 0.32 $p \leq 0.05$ for men (not significant for women)<br>Anxiety to $L_{eq}$ and $L_{max}$ not significant (for men and women)<br><br>Note: The primary outcome was not anxiety, and so the relationship between anxiety and noise exposure was not explored further. | Pollution Agency, the Nordic Noise Group, and the Norwegian Research Council for Science and Humanities<br><br>Confounding<br>Some controlled for age<br><br>Strengths/weaknesses<br>:<br>+ good exposure assessment<br>- sampling/recruiting                                               |

| Reference<br>(First author, publication year, S/N)<br>Meta-analysis | Population   |                                                                                                                                                                                                                                                  | Outcome                                           | Exposure        |                     |                 | Results | Comments<br>(study quality [overall assessment according to SIGN/CASP], conflict of interest [stated vs. not stated], funding [financed from public funds vs. financed from industry], confounding, strengths / weaknesses [potential bias, over- or underestimation of potential effects]) |
|---------------------------------------------------------------------|--------------|--------------------------------------------------------------------------------------------------------------------------------------------------------------------------------------------------------------------------------------------------|---------------------------------------------------|-----------------|---------------------|-----------------|---------|---------------------------------------------------------------------------------------------------------------------------------------------------------------------------------------------------------------------------------------------------------------------------------------------|
|                                                                     | Study design | Study region<br>Sample population<br>Sample size (M, F, M+F):<br>Age (mean, range)<br>No. of cases / no. of controls or exposed/unexposed<br>Time of recruitment / follow-up (mean, range)<br>Response (%)<br>(baseline minus loss to follow-up) | Disease (ICD-10)<br>Prescription<br>Questionnaire | exposure source | exposure assessment | exposure levels |         |                                                                                                                                                                                                                                                                                             |
|                                                                     |              |                                                                                                                                                                                                                                                  |                                                   |                 |                     |                 |         | not described-<br>potential selection bias<br>- population characteristics not described<br>- only significant values shown for some tables<br>- No power calculation<br>- cross-sectional design<br>- older persons more often declined to take part in the study than                     |

| Reference<br>(First author, publication year, S/N)<br>Meta-analysis | Study design                     | Population                                                                                                                                                                                                                                       | Outcome                                                                       | Exposure                            |                     |                                         | Results                                                                                                                                                                                  | Comments<br>(study quality [overall assessment according to SIGN/CASP], conflict of interest [stated vs. not stated], funding [financed from public funds vs. financed from industry], confounding, strengths / weaknesses [potential bias, over- or underestimation of potential effects]) |   |    |        |        |     |   |  |                                                                                                                                                                                                      |
|---------------------------------------------------------------------|----------------------------------|--------------------------------------------------------------------------------------------------------------------------------------------------------------------------------------------------------------------------------------------------|-------------------------------------------------------------------------------|-------------------------------------|---------------------|-----------------------------------------|------------------------------------------------------------------------------------------------------------------------------------------------------------------------------------------|---------------------------------------------------------------------------------------------------------------------------------------------------------------------------------------------------------------------------------------------------------------------------------------------|---|----|--------|--------|-----|---|--|------------------------------------------------------------------------------------------------------------------------------------------------------------------------------------------------------|
|                                                                     |                                  | Study region<br>Sample population<br>Sample size (M, F, M+F):<br>Age (mean, range)<br>No. of cases / no. of controls or exposed/unexposed<br>Time of recruitment / follow-up (mean, range)<br>Response (%)<br>(baseline minus loss to follow-up) | Disease (ICD-10)<br>Prescription<br>Questionnaire                             | exposure source                     | exposure assessment | exposure levels                         |                                                                                                                                                                                          |                                                                                                                                                                                                                                                                                             |   |    |        |        |     |   |  |                                                                                                                                                                                                      |
| Okonen, 2018, 8461                                                  | Cross-sectional study (Helsinki) | Study region: Helsinki, Espoo, Vantaa (Finland)<br><br>Sample size:                                                                                                                                                                              | „survey questionnaire“ (no literature)<br>1 question about intake of sleeping | Road traffic noise<br><br>Data from | L <sub>DEN</sub>    | ≤45 dB, 45.1–50 dB, 50.1–55 dB, 55.1–60 | Table 2: OR modelled noise and sleep medication (adjusted)                                                                                                                               | study quality:<br>-<br>Cross-sectional analysis<br>conflict of interest:                                                                                                                                                                                                                    |   |    |        |        |     |   |  |                                                                                                                                                                                                      |
|                                                                     |                                  |                                                                                                                                                                                                                                                  |                                                                               |                                     |                     |                                         | <table border="1"> <thead> <tr> <th>dB</th> <th>n</th> <th>OR</th> <th>95% CI</th> </tr> </thead> <tbody> <tr> <td>≤45 dB</td> <td>119</td> <td>1</td> <td></td> </tr> </tbody> </table> | dB                                                                                                                                                                                                                                                                                          | n | OR | 95% CI | ≤45 dB | 119 | 1 |  | younger persons (selection bias)<br>Underestimation of potential effects:<br>younger population with better health<br>- no other noise exposure considered<br>- air particulate level not considered |
| dB                                                                  | n                                | OR                                                                                                                                                                                                                                               | 95% CI                                                                        |                                     |                     |                                         |                                                                                                                                                                                          |                                                                                                                                                                                                                                                                                             |   |    |        |        |     |   |  |                                                                                                                                                                                                      |
| ≤45 dB                                                              | 119                              | 1                                                                                                                                                                                                                                                |                                                                               |                                     |                     |                                         |                                                                                                                                                                                          |                                                                                                                                                                                                                                                                                             |   |    |        |        |     |   |  |                                                                                                                                                                                                      |

| Reference<br>(First author, publication year, S/N)<br>Meta-analysis | Study design | Population                                                                                                                                                                                                                                                                                                                                                                  | Outcome                                                                                                                                                                                       | Exposure        |                                                                |                 | Results |      |             |                                                                                                                                                                                                                                                                         | Comments<br>(study quality [overall assessment according to SIGN/CASP], conflict of interest [stated vs. not stated], funding [financed from public funds vs. financed from industry], confounding, strengths / weaknesses [potential bias, over- or underestimation of potential effects]) |
|---------------------------------------------------------------------|--------------|-----------------------------------------------------------------------------------------------------------------------------------------------------------------------------------------------------------------------------------------------------------------------------------------------------------------------------------------------------------------------------|-----------------------------------------------------------------------------------------------------------------------------------------------------------------------------------------------|-----------------|----------------------------------------------------------------|-----------------|---------|------|-------------|-------------------------------------------------------------------------------------------------------------------------------------------------------------------------------------------------------------------------------------------------------------------------|---------------------------------------------------------------------------------------------------------------------------------------------------------------------------------------------------------------------------------------------------------------------------------------------|
|                                                                     |              | Study region<br>Sample population<br>Sample size (M, F, M+F):<br>Age (mean, range)<br>No. of cases / no. of controls or exposed/unexposed<br>Time of recruitment / follow-up (mean, range)<br>Response (%)<br>(baseline minus loss to follow-up)                                                                                                                            | Disease (ICD-10)<br>Prescription<br>Questionnaire                                                                                                                                             | exposure source | exposure assessment                                            | exposure levels |         |      |             |                                                                                                                                                                                                                                                                         |                                                                                                                                                                                                                                                                                             |
| nki<br>Capital<br>Region<br>Environmental<br>Health<br>Survey)      |              | M+F= 7,321 (valid records)<br>M+F: 5,860 (included -> no missing data)<br>M= 2,497, F= 3,363<br><br>Sample population:<br>Random sample of population registry of Finland, adults>24 years<br><br>Age (mean)<br>Overall: 55.0 years<br>≤45 dB: 55.0 years (± 15.4)<br>45.1–50 dB: 54.5 years (± 15.6)<br>50.1–55 dB: 54.5 years (± 15.9)<br>55.1–60 dB: 54.4 years (± 16.5) | pills (proxy for sleep disorders), tranquilizers (proxy for anxiety disorders) and antidepressants (proxy for depression) (past week, 1-4 weeks ago, 1-12 months ago, over a year ago, never) | 2011            | dB ≥60 dB<br><br>(sensitivity analysis: 60.1–65 dB and >65 dB) | 45.1–50         | 194     | 1.17 | 0.87–1.45   | stated funding: not stated confounding (controlled for): sex, age, marital status, employment status, household income, alcohol intake, current smoking status, level of physical activity and pet ownership<br>“almost all respondents lived in urban areas, there was |                                                                                                                                                                                                                                                                                             |
|                                                                     |              |                                                                                                                                                                                                                                                                                                                                                                             |                                                                                                                                                                                               |                 |                                                                | 50.1–55         | 182     | 0.99 | 0.77–1.28   |                                                                                                                                                                                                                                                                         |                                                                                                                                                                                                                                                                                             |
|                                                                     |              |                                                                                                                                                                                                                                                                                                                                                                             |                                                                                                                                                                                               |                 |                                                                | 55.1–60         | 168     | 1.06 | 0.81–1.37   |                                                                                                                                                                                                                                                                         |                                                                                                                                                                                                                                                                                             |
|                                                                     |              |                                                                                                                                                                                                                                                                                                                                                                             |                                                                                                                                                                                               |                 |                                                                | ≥60             | 174     | 0.97 | 0.75–1.26   |                                                                                                                                                                                                                                                                         |                                                                                                                                                                                                                                                                                             |
| Table 2: OR modelled noise and anxiolytics (adjusted)               |              |                                                                                                                                                                                                                                                                                                                                                                             |                                                                                                                                                                                               |                 |                                                                |                 |         |      |             |                                                                                                                                                                                                                                                                         |                                                                                                                                                                                                                                                                                             |
|                                                                     |              |                                                                                                                                                                                                                                                                                                                                                                             |                                                                                                                                                                                               |                 |                                                                | dB              | n       | OR   | 95% CI      |                                                                                                                                                                                                                                                                         |                                                                                                                                                                                                                                                                                             |
|                                                                     |              |                                                                                                                                                                                                                                                                                                                                                                             |                                                                                                                                                                                               |                 |                                                                | ≤45 dB          | 48      | 1    |             |                                                                                                                                                                                                                                                                         |                                                                                                                                                                                                                                                                                             |
|                                                                     |              |                                                                                                                                                                                                                                                                                                                                                                             |                                                                                                                                                                                               |                 |                                                                | 45.1–50         | 82      | 1.12 | (0.77–1.63) |                                                                                                                                                                                                                                                                         |                                                                                                                                                                                                                                                                                             |

| Reference<br>(First author, publication year, S/N)<br>Meta-analysis | Study design | Population                                                                                                                                                                                                                                       | Outcome                                           | Exposure        |                     |                 | Results                                                                                                                                                                                                                                                                                                                                                                                                                                                                                                                                                                                                                                                                  | Comments<br>(study quality [overall assessment according to SIGN/CASP], conflict of interest [stated vs. not stated], funding [financed from public funds vs. financed from industry], confounding, strengths / weaknesses [potential bias, over- or underestimation of potential effects]) |    |      |             |         |    |      |             |     |     |      |             |    |   |    |        |        |    |   |  |         |    |      |             |         |    |      |             |                                                                                                                                                                                                                                                                                                                 |
|---------------------------------------------------------------------|--------------|--------------------------------------------------------------------------------------------------------------------------------------------------------------------------------------------------------------------------------------------------|---------------------------------------------------|-----------------|---------------------|-----------------|--------------------------------------------------------------------------------------------------------------------------------------------------------------------------------------------------------------------------------------------------------------------------------------------------------------------------------------------------------------------------------------------------------------------------------------------------------------------------------------------------------------------------------------------------------------------------------------------------------------------------------------------------------------------------|---------------------------------------------------------------------------------------------------------------------------------------------------------------------------------------------------------------------------------------------------------------------------------------------|----|------|-------------|---------|----|------|-------------|-----|-----|------|-------------|----|---|----|--------|--------|----|---|--|---------|----|------|-------------|---------|----|------|-------------|-----------------------------------------------------------------------------------------------------------------------------------------------------------------------------------------------------------------------------------------------------------------------------------------------------------------|
|                                                                     |              | Study region<br>Sample population<br>Sample size (M, F, M+F):<br>Age (mean, range)<br>No. of cases / no. of controls or exposed/unexposed<br>Time of recruitment / follow-up (mean, range)<br>Response (%)<br>(baseline minus loss to follow-up) | Disease (ICD-10)<br>Prescription<br>Questionnaire | exposure source | exposure assessment | exposure levels |                                                                                                                                                                                                                                                                                                                                                                                                                                                                                                                                                                                                                                                                          |                                                                                                                                                                                                                                                                                             |    |      |             |         |    |      |             |     |     |      |             |    |   |    |        |        |    |   |  |         |    |      |             |         |    |      |             |                                                                                                                                                                                                                                                                                                                 |
|                                                                     |              | <p>≥60 dB: 53.5 years (± 16.6)</p> <p>Time of recruitment<br/>2015-2016</p> <p>Response: N=16,000<br/>47% in 2015 and 45% in 2016</p>                                                                                                            |                                                   |                 |                     |                 | <table border="1"> <tr> <td>50.1–55</td> <td>82</td> <td>1.09</td> <td>(0.75–1.58)</td> </tr> <tr> <td>55.1–60</td> <td>79</td> <td>1.24</td> <td>(0.85–1.82)</td> </tr> <tr> <td>≥60</td> <td>101</td> <td>1.34</td> <td>(0.93–1.93)</td> </tr> </table> <p>Table 2: OR modelled noise and antidepressants (adjusted)</p> <table border="1"> <thead> <tr> <th>dB</th> <th>n</th> <th>OR</th> <th>95% CI</th> </tr> </thead> <tbody> <tr> <td>≤45 dB</td> <td>49</td> <td>1</td> <td></td> </tr> <tr> <td>45.1–50</td> <td>86</td> <td>1.20</td> <td>(0.83–1.73)</td> </tr> <tr> <td>50.1–55</td> <td>84</td> <td>1.13</td> <td>(0.78–1.64)</td> </tr> </tbody> </table> | 50.1–55                                                                                                                                                                                                                                                                                     | 82 | 1.09 | (0.75–1.58) | 55.1–60 | 79 | 1.24 | (0.85–1.82) | ≥60 | 101 | 1.34 | (0.93–1.93) | dB | n | OR | 95% CI | ≤45 dB | 49 | 1 |  | 45.1–50 | 86 | 1.20 | (0.83–1.73) | 50.1–55 | 84 | 1.13 | (0.78–1.64) | <p>no justification to control for urbanity”</p> <p>Sensitivity analysis (test for effect modification) . noise annoyance, noise sensitivity, sleep disturbance from road-traffic noise, bedroom window orientation, BMI and presence of chronic disease</p> <p>strengths, weaknesses:<br/>-Cross-sectional</p> |
| 50.1–55                                                             | 82           | 1.09                                                                                                                                                                                                                                             | (0.75–1.58)                                       |                 |                     |                 |                                                                                                                                                                                                                                                                                                                                                                                                                                                                                                                                                                                                                                                                          |                                                                                                                                                                                                                                                                                             |    |      |             |         |    |      |             |     |     |      |             |    |   |    |        |        |    |   |  |         |    |      |             |         |    |      |             |                                                                                                                                                                                                                                                                                                                 |
| 55.1–60                                                             | 79           | 1.24                                                                                                                                                                                                                                             | (0.85–1.82)                                       |                 |                     |                 |                                                                                                                                                                                                                                                                                                                                                                                                                                                                                                                                                                                                                                                                          |                                                                                                                                                                                                                                                                                             |    |      |             |         |    |      |             |     |     |      |             |    |   |    |        |        |    |   |  |         |    |      |             |         |    |      |             |                                                                                                                                                                                                                                                                                                                 |
| ≥60                                                                 | 101          | 1.34                                                                                                                                                                                                                                             | (0.93–1.93)                                       |                 |                     |                 |                                                                                                                                                                                                                                                                                                                                                                                                                                                                                                                                                                                                                                                                          |                                                                                                                                                                                                                                                                                             |    |      |             |         |    |      |             |     |     |      |             |    |   |    |        |        |    |   |  |         |    |      |             |         |    |      |             |                                                                                                                                                                                                                                                                                                                 |
| dB                                                                  | n            | OR                                                                                                                                                                                                                                               | 95% CI                                            |                 |                     |                 |                                                                                                                                                                                                                                                                                                                                                                                                                                                                                                                                                                                                                                                                          |                                                                                                                                                                                                                                                                                             |    |      |             |         |    |      |             |     |     |      |             |    |   |    |        |        |    |   |  |         |    |      |             |         |    |      |             |                                                                                                                                                                                                                                                                                                                 |
| ≤45 dB                                                              | 49           | 1                                                                                                                                                                                                                                                |                                                   |                 |                     |                 |                                                                                                                                                                                                                                                                                                                                                                                                                                                                                                                                                                                                                                                                          |                                                                                                                                                                                                                                                                                             |    |      |             |         |    |      |             |     |     |      |             |    |   |    |        |        |    |   |  |         |    |      |             |         |    |      |             |                                                                                                                                                                                                                                                                                                                 |
| 45.1–50                                                             | 86           | 1.20                                                                                                                                                                                                                                             | (0.83–1.73)                                       |                 |                     |                 |                                                                                                                                                                                                                                                                                                                                                                                                                                                                                                                                                                                                                                                                          |                                                                                                                                                                                                                                                                                             |    |      |             |         |    |      |             |     |     |      |             |    |   |    |        |        |    |   |  |         |    |      |             |         |    |      |             |                                                                                                                                                                                                                                                                                                                 |
| 50.1–55                                                             | 84           | 1.13                                                                                                                                                                                                                                             | (0.78–1.64)                                       |                 |                     |                 |                                                                                                                                                                                                                                                                                                                                                                                                                                                                                                                                                                                                                                                                          |                                                                                                                                                                                                                                                                                             |    |      |             |         |    |      |             |     |     |      |             |    |   |    |        |        |    |   |  |         |    |      |             |         |    |      |             |                                                                                                                                                                                                                                                                                                                 |



| Reference<br>(First author, publication year, S/N)<br>Meta-analysis | Population   |                                                                                                                                                                                                                                                  | Outcome                                           | Exposure        |                     |                 | Results | Comments<br>(study quality [overall assessment according to SIGN/CASP], conflict of interest [stated vs. not stated], funding [financed from public funds vs. financed from industry], confounding, strengths / weaknesses [potential bias, over- or underestimation of potential effects]) |
|---------------------------------------------------------------------|--------------|--------------------------------------------------------------------------------------------------------------------------------------------------------------------------------------------------------------------------------------------------|---------------------------------------------------|-----------------|---------------------|-----------------|---------|---------------------------------------------------------------------------------------------------------------------------------------------------------------------------------------------------------------------------------------------------------------------------------------------|
|                                                                     | Study design | Study region<br>Sample population<br>Sample size (M, F, M+F):<br>Age (mean, range)<br>No. of cases / no. of controls or exposed/unexposed<br>Time of recruitment / follow-up (mean, range)<br>Response (%)<br>(baseline minus loss to follow-up) | Disease (ICD-10)<br>Prescription<br>Questionnaire | exposure source | exposure assessment | exposure levels |         |                                                                                                                                                                                                                                                                                             |
|                                                                     |              |                                                                                                                                                                                                                                                  |                                                   |                 |                     |                 |         | psychotropic medication is prescription-based in Finland, thus outcome represents a diagnosed condition requiring treatment)<br>- No information on questionnaire (, self-assessed, not validated?)<br>- Air pollution not considered as confounder<br>+ random selection of participants   |

| Reference<br>(First author, publication year, S/N)<br>Meta-analysis | Study design             | Population                                                                                                                                                                                                                                       | Outcome                                                                                                                 | Exposure           |                                                                                                                              |                                                                                                          | Results                                                                                                                                                                          |                                    |            | Comments<br>(study quality [overall assessment according to SIGN/CASP], conflict of interest [stated vs. not stated], funding [financed from public funds vs. financed from industry], confounding, strengths / weaknesses [potential bias, over- or underestimation of potential effects]) |
|---------------------------------------------------------------------|--------------------------|--------------------------------------------------------------------------------------------------------------------------------------------------------------------------------------------------------------------------------------------------|-------------------------------------------------------------------------------------------------------------------------|--------------------|------------------------------------------------------------------------------------------------------------------------------|----------------------------------------------------------------------------------------------------------|----------------------------------------------------------------------------------------------------------------------------------------------------------------------------------|------------------------------------|------------|---------------------------------------------------------------------------------------------------------------------------------------------------------------------------------------------------------------------------------------------------------------------------------------------|
|                                                                     |                          | Study region<br>Sample population<br>Sample size (M, F, M+F):<br>Age (mean, range)<br>No. of cases / no. of controls or exposed/unexposed<br>Time of recruitment / follow-up (mean, range)<br>Response (%)<br>(baseline minus loss to follow-up) | Disease (ICD-10)<br>Prescription<br>Questionnaire                                                                       | exposure source    | exposure assessment                                                                                                          | exposure levels                                                                                          |                                                                                                                                                                                  |                                    |            |                                                                                                                                                                                                                                                                                             |
| Orban, 2016, 1890<br>Yes                                            | Prospective cohort study | Study region:<br>Bochum, Essen and Mülheim/Ruhr, Germany<br><br>Population sample:<br>Residents aged 45-75 years, randomly selected from population registries (Heinz-Nixdorf Recall study)                                                      | Depression symptoms during the previous week<br>15 item CES-D<br><br>Antidepressive medication taken in previous 7 days | Road traffic noise | L <sub>DEN</sub><br>L <sub>N</sub><br><br>Noise exposure data was assigned to the geographic residence location of the study | High noise exposure<br>L <sub>DEN</sub> : >55 dB<br>vs<br>low noise exposure<br>L <sub>DEN</sub> : ≤55dB | Relative risks of high depressive symptoms at follow-up in association with exposure to different categories of 24 hour noise compared with the lowest noise category (Figure 2) | Noise dB<br>RR<br>(95% CI)<br>1.00 | n<br>1,986 | Study quality +<br><br>Conflict of interest<br>No actual or potential competing financial interests declared<br><br>Funding<br>Public                                                                                                                                                       |





| Reference<br>(First author, publication year, S/N)<br>Meta-analysis | Study design | Population                                                                                                                                                                                                                                       | Outcome                                           | Exposure                     |                     |                 | Results      | Comments<br>(study quality [overall assessment according to SIGN/CASP], conflict of interest [stated vs. not stated], funding [financed from public funds vs. financed from industry], confounding, strengths / weaknesses [potential bias, over- or underestimation of potential effects]) |       |
|---------------------------------------------------------------------|--------------|--------------------------------------------------------------------------------------------------------------------------------------------------------------------------------------------------------------------------------------------------|---------------------------------------------------|------------------------------|---------------------|-----------------|--------------|---------------------------------------------------------------------------------------------------------------------------------------------------------------------------------------------------------------------------------------------------------------------------------------------|-------|
|                                                                     |              | Study region<br>Sample population<br>Sample size (M, F, M+F):<br>Age (mean, range)<br>No. of cases / no. of controls or exposed/unexposed<br>Time of recruitment / follow-up (mean, range)<br>Response (%)<br>(baseline minus loss to follow-up) | Disease (ICD-10)<br>Prescription<br>Questionnaire | exposure source              | exposure assessment | exposure levels |              |                                                                                                                                                                                                                                                                                             |       |
|                                                                     |              | Time of recruitment/follow-up:<br>Baseline: 2000-2003<br>Follow-up: 2005-2008<br>Mean follow-up: 5.1 years                                                                                                                                       |                                                   | e noise levels LN:<br>>50 dB |                     |                 | (1.03, 1.62) | BMI and smoking Model 3: in addition, comorbidities and insomnia                                                                                                                                                                                                                            |       |
|                                                                     |              | Response (%)<br>In baseline survey: 55.8%                                                                                                                                                                                                        |                                                   |                              | Men                 |                 | 1.29         | 98                                                                                                                                                                                                                                                                                          | 1,650 |
|                                                                     |              | Loss to follow-up<br>12.9%                                                                                                                                                                                                                       |                                                   |                              | Women               |                 | 1.30         | 181                                                                                                                                                                                                                                                                                         | 1,445 |
|                                                                     |              |                                                                                                                                                                                                                                                  |                                                   |                              | Total               | Model 2         | 1.28         | 278                                                                                                                                                                                                                                                                                         | 3,089 |
|                                                                     |              |                                                                                                                                                                                                                                                  |                                                   |                              | Men                 |                 | 1.28         | 98                                                                                                                                                                                                                                                                                          | 1,650 |
|                                                                     |              |                                                                                                                                                                                                                                                  |                                                   |                              | Women               |                 | 1.28         | 180                                                                                                                                                                                                                                                                                         | 1,445 |

| Reference<br>(First author, publication year, S/N)<br>Meta-analysis | Study design | Population                                                                                                                                                                                                                                       | Outcome                                           | Exposure        |                     |                 | Results                                                                                              | Comments<br>(study quality [overall assessment according to SIGN/CASP], conflict of interest [stated vs. not stated], funding [financed from public funds vs. financed from industry], confounding, strengths / weaknesses [potential bias, over- or underestimation of potential effects]) |                                                                                         |
|---------------------------------------------------------------------|--------------|--------------------------------------------------------------------------------------------------------------------------------------------------------------------------------------------------------------------------------------------------|---------------------------------------------------|-----------------|---------------------|-----------------|------------------------------------------------------------------------------------------------------|---------------------------------------------------------------------------------------------------------------------------------------------------------------------------------------------------------------------------------------------------------------------------------------------|-----------------------------------------------------------------------------------------|
|                                                                     |              | Study region<br>Sample population<br>Sample size (M, F, M+F):<br>Age (mean, range)<br>No. of cases / no. of controls or exposed/unexposed<br>Time of recruitment / follow-up (mean, range)<br>Response (%)<br>(baseline minus loss to follow-up) | Disease (ICD-10)<br>Prescription<br>Questionnaire | exposure source | exposure assessment | exposure levels |                                                                                                      |                                                                                                                                                                                                                                                                                             |                                                                                         |
|                                                                     |              |                                                                                                                                                                                                                                                  |                                                   |                 |                     |                 | (0.97, 1.69)                                                                                         | + high baseline response and low loss to follow-up                                                                                                                                                                                                                                          |                                                                                         |
|                                                                     |              |                                                                                                                                                                                                                                                  |                                                   |                 |                     |                 | Model 3                                                                                              |                                                                                                                                                                                                                                                                                             |                                                                                         |
|                                                                     |              |                                                                                                                                                                                                                                                  |                                                   |                 |                     |                 | Total 1.26                                                                                           | 276 3,075                                                                                                                                                                                                                                                                                   | + Confounder list pretty inclusive                                                      |
|                                                                     |              |                                                                                                                                                                                                                                                  |                                                   |                 |                     |                 | Men 1.21                                                                                             | 97 1,637                                                                                                                                                                                                                                                                                    | - Self-reported antidepressant medication (participants were asked to bring medication) |
|                                                                     |              |                                                                                                                                                                                                                                                  |                                                   |                 |                     |                 | Women 1.28                                                                                           | 179 1,438                                                                                                                                                                                                                                                                                   | - not adjusted for air particulate level                                                |
|                                                                     |              |                                                                                                                                                                                                                                                  |                                                   |                 |                     |                 | Model 1 adjusted for age, sex, education, income, economic activity, neighborhood-level SES, traffic |                                                                                                                                                                                                                                                                                             | - other sources of noise not considered<br>- Noise modeled for                          |

| Reference<br>(First author, publication year, S/N)<br>Meta-analysis | Study design | Population                                                                                                                                                                                                                                       | Outcome                                           | Exposure        |                     |                 | Results                                                                                                                                                                                                                                                                                                                                                                                                    | Comments<br>(study quality [overall assessment according to SIGN/CASP], conflict of interest [stated vs. not stated], funding [financed from public funds vs. financed from industry], confounding, strengths / weaknesses [potential bias, over- or underestimation of potential effects]) |
|---------------------------------------------------------------------|--------------|--------------------------------------------------------------------------------------------------------------------------------------------------------------------------------------------------------------------------------------------------|---------------------------------------------------|-----------------|---------------------|-----------------|------------------------------------------------------------------------------------------------------------------------------------------------------------------------------------------------------------------------------------------------------------------------------------------------------------------------------------------------------------------------------------------------------------|---------------------------------------------------------------------------------------------------------------------------------------------------------------------------------------------------------------------------------------------------------------------------------------------|
|                                                                     |              | Study region<br>Sample population<br>Sample size (M, F, M+F):<br>Age (mean, range)<br>No. of cases / no. of controls or exposed/unexposed<br>Time of recruitment / follow-up (mean, range)<br>Response (%)<br>(baseline minus loss to follow-up) | Disease (ICD-10)<br>Prescription<br>Questionnaire | exposure source | exposure assessment | exposure levels |                                                                                                                                                                                                                                                                                                                                                                                                            |                                                                                                                                                                                                                                                                                             |
|                                                                     |              |                                                                                                                                                                                                                                                  |                                                   |                 |                     |                 | proximity<br>Model 2 additionally adjusted for BMI, smoking<br>Model 3 additionally adjusted for comorbidities, insomnia<br><br>Relative risk of high depressive symptoms at follow-up in study participants exposed to residential night traffic noise $L_N > 50\text{dB}$ and $L_N \leq 50\text{dB}$ (Supplemental Material)<br>Model RR<br>Model 1<br>Total 1.29 (1.0 1, 1.64)<br>Men 1.19 (0.77, 1.82) | the year 2006, after baseline survey was done, and assumption of unchanged noise exposure during the study period may not hold<br>- no other noise exposure considered<br>- air particulate level not considered                                                                            |

| Reference<br>(First author, publication year, S/N)<br>Meta-analysis | Study design | Population                                                                                                                                                                                                                                       | Outcome                                           | Exposure        |                     |                 | Results                                                                                                                                                                                                     | Comments<br>(study quality [overall assessment according to SIGN/CASP], conflict of interest [stated vs. not stated], funding [financed from public funds vs. financed from industry], confounding, strengths / weaknesses [potential bias, over- or underestimation of potential effects]) |
|---------------------------------------------------------------------|--------------|--------------------------------------------------------------------------------------------------------------------------------------------------------------------------------------------------------------------------------------------------|---------------------------------------------------|-----------------|---------------------|-----------------|-------------------------------------------------------------------------------------------------------------------------------------------------------------------------------------------------------------|---------------------------------------------------------------------------------------------------------------------------------------------------------------------------------------------------------------------------------------------------------------------------------------------|
|                                                                     |              | Study region<br>Sample population<br>Sample size (M, F, M+F):<br>Age (mean, range)<br>No. of cases / no. of controls or exposed/unexposed<br>Time of recruitment / follow-up (mean, range)<br>Response (%)<br>(baseline minus loss to follow-up) | Disease (ICD-10)<br>Prescription<br>Questionnaire | exposure source | exposure assessment | exposure levels |                                                                                                                                                                                                             |                                                                                                                                                                                                                                                                                             |
|                                                                     |              |                                                                                                                                                                                                                                                  |                                                   |                 |                     |                 | Women 1.36 (1.01, 1.82)<br>Model 2<br>Total 1.30 (1.02, 1.65)<br>Men 1.19 (0.76, 1.86)<br>Women 1.37 (1.02, 1.83)<br>Model 3<br>Total 1.29 (1.01, 1.64)<br>Men 1.14 (0.74, 1.76)<br>Women 1.39 (1.03, 1.86) |                                                                                                                                                                                                                                                                                             |
|                                                                     |              |                                                                                                                                                                                                                                                  |                                                   |                 |                     |                 | Using Model 1, for L <sub>DEN</sub> , <55dB=Ref (Fig. 2)<br>Noise level RR<br>>55 to ≤60 1.19 (0.86, 1.65)                                                                                                  |                                                                                                                                                                                                                                                                                             |

| Reference<br>(First author, publication year, S/N)<br>Meta-analysis | Study design | Population                                                                                                                                                                                                                                       | Outcome                                           | Exposure        |                              |                 | Results                                                                                                                                                                              | Comments<br>(study quality [overall assessment according to SIGN/CASP], conflict of interest [stated vs. not stated], funding [financed from public funds vs. financed from industry], confounding, strengths / weaknesses [potential bias, over- or underestimation of potential effects]) |
|---------------------------------------------------------------------|--------------|--------------------------------------------------------------------------------------------------------------------------------------------------------------------------------------------------------------------------------------------------|---------------------------------------------------|-----------------|------------------------------|-----------------|--------------------------------------------------------------------------------------------------------------------------------------------------------------------------------------|---------------------------------------------------------------------------------------------------------------------------------------------------------------------------------------------------------------------------------------------------------------------------------------------|
|                                                                     |              | Study region<br>Sample population<br>Sample size (M, F, M+F):<br>Age (mean, range)<br>No. of cases / no. of controls or exposed/unexposed<br>Time of recruitment / follow-up (mean, range)<br>Response (%)<br>(baseline minus loss to follow-up) | Disease (ICD-10)<br>Prescription<br>Questionnaire | exposure source | exposure assessment          | exposure levels |                                                                                                                                                                                      |                                                                                                                                                                                                                                                                                             |
|                                                                     |              |                                                                                                                                                                                                                                                  |                                                   |                 |                              |                 | >60 to ≤65 1.52 (1.11, 2.07)<br>>65 1.19 (0.85, 1.68)                                                                                                                                |                                                                                                                                                                                                                                                                                             |
|                                                                     |              |                                                                                                                                                                                                                                                  |                                                   |                 |                              |                 | Using Model 1, for L <sub>N</sub> , <55dB= Ref<br>(Supplemental material)<br>Noise level RR<br>>50 to ≤55 1.41 (1.04, 1.91)<br>>55 to ≤60 1.14 (0.78, 1.65)<br>>60 1.30 (0.80, 2.09) |                                                                                                                                                                                                                                                                                             |
|                                                                     |              |                                                                                                                                                                                                                                                  |                                                   |                 |                              |                 | Sensitivity analysis show relative risks of high depressive symptoms at follow-up per education and insomnia at follow-up                                                            |                                                                                                                                                                                                                                                                                             |
| Schreck                                                             | Cross-       | Study region:                                                                                                                                                                                                                                    | Medications of:                                   | Aircraft        | L <sub>eq,16h</sub> (06-22h) | Categori        | Results from Appendix A5:                                                                                                                                                            | study quality:                                                                                                                                                                                                                                                                              |

| Reference<br>(First author, publication year, S/N)<br>Meta-analysis                                     | Study design     | Population                                                                                                                                                                                                                                                                                         | Outcome                                                                                                                                                                                                  | Exposure                                                                                                                                                                      |                                                                                                                                        |                                                                                                                                                                                                                                                                                                                                                                                                                                                                                                            | Results                                                                                                                                                                                                       | Comments<br>(study quality [overall assessment according to SIGN/CASP], conflict of interest [stated vs. not stated], funding [financed from public funds vs. financed from industry], confounding, strengths / weaknesses [potential bias, over- or underestimation of potential effects]) |
|---------------------------------------------------------------------------------------------------------|------------------|----------------------------------------------------------------------------------------------------------------------------------------------------------------------------------------------------------------------------------------------------------------------------------------------------|----------------------------------------------------------------------------------------------------------------------------------------------------------------------------------------------------------|-------------------------------------------------------------------------------------------------------------------------------------------------------------------------------|----------------------------------------------------------------------------------------------------------------------------------------|------------------------------------------------------------------------------------------------------------------------------------------------------------------------------------------------------------------------------------------------------------------------------------------------------------------------------------------------------------------------------------------------------------------------------------------------------------------------------------------------------------|---------------------------------------------------------------------------------------------------------------------------------------------------------------------------------------------------------------|---------------------------------------------------------------------------------------------------------------------------------------------------------------------------------------------------------------------------------------------------------------------------------------------|
|                                                                                                         |                  | Study region<br>Sample population<br>Sample size (M, F, M+F):<br>Age (mean, range)<br>No. of cases / no. of controls or exposed/unexposed<br>Time of recruitment / follow-up (mean, range)<br>Response (%)<br>(baseline minus loss to follow-up)                                                   | Disease (ICD-10)<br>Prescription<br>Questionnaire                                                                                                                                                        | exposure source                                                                                                                                                               | exposure assessment                                                                                                                    | exposure levels                                                                                                                                                                                                                                                                                                                                                                                                                                                                                            |                                                                                                                                                                                                               |                                                                                                                                                                                                                                                                                             |
| enberg, D. 2009, H-2883, German y (RDF-St udie (Region aler Dialogf orum Flughaf en Frankfu rt))<br>Yes | sectio nal study | Frankfurt International airport, Germany<br><br>Sample population: randomly selected residents:<br><br>Sample size: M+F=3795<br>participants in face-to-face interviews: M+F=2312 (including 1 person with unlikable address)<br>statistical analysis: M+F= 2311<br>M= 1034, F= 1276, 1 sex change | - Mood stabilizers - sedatives in the past 12 month (Bundesgesundheitsurvey (BGS) 1998)<br>→ Scale: never, seldomly, 1-3x per month, less than one time a week, 1-2x a week, several times a week, daily | LN (22-06h)<br><br>NAT <sub>55</sub> (Count of aircraft over 55 dB) (06-22h) (22-06h)<br><br>L <sub>MAX55</sub> (06-22h) (22-06h)<br><br>Exposure from 2003 in 66 residential | zed: 40-45dB<br>45-50dB<br>50-55dB<br>55-60dB<br>60-65dB<br><br>Referenc e categorie s: For L <sub>eq,16h</sub> : 40-45dB<br>LN: <40dB | Tab. A-17:ORs (95 % CI) for L <sub>eq,16h</sub> in dB and mood stabilizers and sedatives (reference category: 40-45):<br>Mood stabilizers<br>45-50: OR: 1.9 (CI: 0.50-7.11)<br>50-55: OR: 1.5 (CI: 0.38-6.15)<br>55-60: OR:1.4 (CI: 0.38-5.28)<br>60-65:-<br>Sedatives:<br>45-50: OR: 1.0 (CI: 0.32-3.12)<br>50-55: OR: 0.9 (CI: 0.29-3.00)<br>55-60: OR: 0.9 (CI: 0.32-2.72)<br>60-65: OR: 0.5 (CI: 0.10-2.91)<br><br>Tab. A-18:ORs (95 % CI) for L <sub>N</sub> in dB and mood stabilizers and sedatives | -<br>Cross-sectional study design<br><br>conflict of interest: none declared<br><br>funding: Regionales Dialogforum Flughafen Frankfurt<br><br>confounding (adjusted for): noise sensitivity, home ownership, |                                                                                                                                                                                                                                                                                             |

| Reference<br>(First author, publication year, S/N)<br>Meta-analysis | Study design | Population                                                                                                                                                                                                                                       | Outcome                                           | Exposure                                                                         |                                                                                         |                                                                                                                                                                                                                                                                                                                                                                                                                                                                                                   | Results                                                                                                                                                                                                                                                             | Comments<br>(study quality [overall assessment according to SIGN/CASP], conflict of interest [stated vs. not stated], funding [financed from public funds vs. financed from industry], confounding, strengths / weaknesses [potential bias, over- or underestimation of potential effects]) |
|---------------------------------------------------------------------|--------------|--------------------------------------------------------------------------------------------------------------------------------------------------------------------------------------------------------------------------------------------------|---------------------------------------------------|----------------------------------------------------------------------------------|-----------------------------------------------------------------------------------------|---------------------------------------------------------------------------------------------------------------------------------------------------------------------------------------------------------------------------------------------------------------------------------------------------------------------------------------------------------------------------------------------------------------------------------------------------------------------------------------------------|---------------------------------------------------------------------------------------------------------------------------------------------------------------------------------------------------------------------------------------------------------------------|---------------------------------------------------------------------------------------------------------------------------------------------------------------------------------------------------------------------------------------------------------------------------------------------|
|                                                                     |              | Study region<br>Sample population<br>Sample size (M, F, M+F):<br>Age (mean, range)<br>No. of cases / no. of controls or exposed/unexposed<br>Time of recruitment / follow-up (mean, range)<br>Response (%)<br>(baseline minus loss to follow-up) | Disease (ICD-10)<br>Prescription<br>Questionnaire | exposure source                                                                  | exposure assessment                                                                     | exposure levels                                                                                                                                                                                                                                                                                                                                                                                                                                                                                   |                                                                                                                                                                                                                                                                     |                                                                                                                                                                                                                                                                                             |
|                                                                     |              | Age:<br>not reported: 28<br>< 18 years: 17<br>18-19 years: 52<br>20-29 years: 240<br>30-39 years: 293<br>40-49 years: 420<br>50-59 years: 344<br>60-69 years: 440<br>70-79 years: 322<br>≥ 80 years: 155<br><br>Exposed/unexposed:<br>NA         |                                                   | areas<br>(calculation from the addresses) within 40 km distance from the airport | $L_{eq,16h}$<br>- mean: 51.9 dB<br>- SD 6.2<br><br>$L_N$<br>- mean: 45.9 dB<br>- SD 6.6 | (reference category: <40):<br>Mood stabilizers<br>40-45: OR: 0.64 (CI: 0.22-1.85)<br>45-50: OR: 0.44 (CI: 0.12-1.61)<br>50-55: OR: 0.82 (CI: 0.28-2.40)<br>55-60: OR: 0.22 (CI: 0.03-1.86)<br><br>Sedatives:<br>40-45: OR: 0.51 (CI: 0.19-1.42)<br>45-50: OR: 0.61 (CI: 0.20-1.81)<br>50-55: OR: 0.65 (CI: 0.23-1.83)<br>55-60: OR: 0.51 (CI: 0.13-2.05)<br><br>Above models adjusted for noise sensitivity, home ownership, residential satisfaction, windows closed at night, age, gender, time | residential satisfaction, windows closed at night, age, gender, time outside home, social status<br><br>strengths/<br>weaknesses:<br>+ multiple noise parameters<br>+ multiple regression analysis<br>+ exposure measurement<br>+ randomized selection of residents |                                                                                                                                                                                                                                                                                             |



| Reference<br>(First author, publication year, S/N)<br>Meta-analysis | Study design | Population                                                                                                                                                                                                                                       | Outcome                                           | Exposure            |                       |                   | Results                                                 | Comments<br>(study quality [overall assessment according to SIGN/CASP], conflict of interest [stated vs. not stated], funding [financed from public funds vs. financed from industry], confounding, strengths / weaknesses [potential bias, over- or underestimation of potential effects]) |
|---------------------------------------------------------------------|--------------|--------------------------------------------------------------------------------------------------------------------------------------------------------------------------------------------------------------------------------------------------|---------------------------------------------------|---------------------|-----------------------|-------------------|---------------------------------------------------------|---------------------------------------------------------------------------------------------------------------------------------------------------------------------------------------------------------------------------------------------------------------------------------------------|
|                                                                     |              | Study region<br>Sample population<br>Sample size (M, F, M+F):<br>Age (mean, range)<br>No. of cases / no. of controls or exposed/unexposed<br>Time of recruitment / follow-up (mean, range)<br>Response (%)<br>(baseline minus loss to follow-up) | Disease (ICD-10)<br>Prescription<br>Questionnaire | exposure source     | exposure assessment   | exposure levels   |                                                         |                                                                                                                                                                                                                                                                                             |
|                                                                     |              | Time of recruitment/<br>follow-up: time frame of the whole study 2004-2006<br>interviews from Apr.-Dec. 2005<br>noise calculations for 2005<br><br>Response:<br>61%                                                                              |                                                   |                     |                       |                   | outside home, social status                             | (but method not reported)<br>- cross-sectional design<br>- self-reported measurement, but validated<br>- no information on age (mean, range)<br>- no other noise exposure considered<br>- air particulate level not considered                                                              |
| Seidler, 2017,                                                      | Case-control | Study region:<br>Area Frankfurt International                                                                                                                                                                                                    | Secondary data<br>from three health               | Aircraft<br>Railway | Aircraft:<br>Leq, 24h | <40dB,<br>max <50 | Noise<br><br>Aircraft: Leq, 24h<br>OR<br>Case<br>Contro | study quality:<br>+ (to ++)                                                                                                                                                                                                                                                                 |

| Reference<br>(First author, publication year, S/N)<br>Meta-analysis                       | Study design | Population                                                                                                                                                                                                                                                                                                | Outcome                                                                                                                                                                                        | Exposure                                         |                                                                                                                                                                                                 |                                                                                                                                       | Results                                                                                              |                                                                                                      |                                                         | Comments<br>(study quality [overall assessment according to SIGN/CASP], conflict of interest [stated vs. not stated], funding [financed from public funds vs. financed from industry], confounding, strengths / weaknesses [potential bias, over- or underestimation of potential effects]) |                                                                                                                                                                                                                                               |
|-------------------------------------------------------------------------------------------|--------------|-----------------------------------------------------------------------------------------------------------------------------------------------------------------------------------------------------------------------------------------------------------------------------------------------------------|------------------------------------------------------------------------------------------------------------------------------------------------------------------------------------------------|--------------------------------------------------|-------------------------------------------------------------------------------------------------------------------------------------------------------------------------------------------------|---------------------------------------------------------------------------------------------------------------------------------------|------------------------------------------------------------------------------------------------------|------------------------------------------------------------------------------------------------------|---------------------------------------------------------|---------------------------------------------------------------------------------------------------------------------------------------------------------------------------------------------------------------------------------------------------------------------------------------------|-----------------------------------------------------------------------------------------------------------------------------------------------------------------------------------------------------------------------------------------------|
|                                                                                           |              | Study region<br>Sample population<br>Sample size (M, F, M+F):<br>Age (mean, range)<br>No. of cases / no. of controls or exposed/unexposed<br>Time of recruitment / follow-up (mean, range)<br>Response (%)<br>(baseline minus loss to follow-up)                                                          | Disease (ICD-10)<br>Prescription<br>Questionnaire                                                                                                                                              | exposure source                                  | exposure assessment                                                                                                                                                                             | exposure levels                                                                                                                       | (95% CI)                                                                                             | (n)                                                                                                  | 1 (n)                                                   |                                                                                                                                                                                                                                                                                             |                                                                                                                                                                                                                                               |
| 2322, German y + Seidler A., Wagner M., Schubert M., Dröge P., Hegewald J., 2016a. Sekund | study        | Airport<br><br>Sample population:<br>NORAH (all individuals living in the study area aged 40 years or older in 2010 and insured by one of three large statutory health insurance funds between 2005 and 2010)<br><br>Sample size:<br>N= 1,026,670<br>For analysis:<br>M+F= 655,541<br>M=317,153 F=338,388 | insurance funds:<br><br>Disease<br>Depressive episodes (F32,-), recurrent depressive disorder (F33,-), dysthymia (F34.1), mixed anxiety and depression disorder (F41.2)<br><br>Newly diagnosed | Road traffic measured in 2005 (partly 1996-2005) | LN(22-06h) and other night segments<br><br>historical radar data from the German flight safety operator (DFS), analysis according to guidelines for calculations of noise abatement zones (AzB) | dB = reference category<br><br><40 dB, max ≥50 dB;<br>≥40<45dB<br>≥45<50dB<br>≥50<60dB<br>≥60<65dB<br>≥65<70dB<br><br>Start point for | level (dB)<br><br><40, max <50<br><40, max ≥50<br>≥40<45<br>≥45<50dB<br>≥50<60dB<br>≥45<50<br>≥50<55 | (95% CI)<br><br>1.00<br>1.01 (0.98-1.04)<br>1.13 (1.10-1.15)<br>1.18 (1.16-1.21)<br>1.23 (1.19-1.28) | (n)<br><br>28,687<br>4,647<br>24,081<br>13,231<br>5,243 | 1 (n)<br><br>233,178<br>37,668<br>170,171<br>90,227<br>35,784                                                                                                                                                                                                                               | conflict of interest: stated<br>funding: Gemeinnützige Umwelthaus GmbH<br><br>confounding (adjusted for): age, sex, urban living environment, local proportion of people receiving unemployment benefits as indicator of SES and if available |

| Reference<br>(First author, publication year, S/N)<br>Meta-analysis                                                                                          | Study design | Population                                                                                                                                                                                                                                                                                      | Outcome                                           | Exposure                                                                                                                                                                                                                                                                   |                                                                                      |                                    | Results                                                 |                          |                               | Comments<br>(study quality [overall assessment according to SIGN/CASP], conflict of interest [stated vs. not stated], funding [financed from public funds vs. financed from industry], confounding, strengths / weaknesses [potential bias, over- or underestimation of potential effects])                         |
|--------------------------------------------------------------------------------------------------------------------------------------------------------------|--------------|-------------------------------------------------------------------------------------------------------------------------------------------------------------------------------------------------------------------------------------------------------------------------------------------------|---------------------------------------------------|----------------------------------------------------------------------------------------------------------------------------------------------------------------------------------------------------------------------------------------------------------------------------|--------------------------------------------------------------------------------------|------------------------------------|---------------------------------------------------------|--------------------------|-------------------------------|---------------------------------------------------------------------------------------------------------------------------------------------------------------------------------------------------------------------------------------------------------------------------------------------------------------------|
|                                                                                                                                                              |              | Study region<br>Sample population<br>Sample size (M, F, M+F):<br>Age (mean, range)<br>No. of cases / no. of controls or exposed/unexposed<br>Time of recruitment / follow-up (mean, range)<br>Response (%)<br>(baseline minus loss to follow-up)                                                | Disease (ICD-10)<br>Prescription<br>Questionnaire | exposure source                                                                                                                                                                                                                                                            | exposure assessment                                                                  | exposure levels                    |                                                         |                          |                               |                                                                                                                                                                                                                                                                                                                     |
| ärdaten<br>basierte<br>Fallkon<br>trollstu<br>die mit<br>vertiefe<br>nder<br>Befragu<br>ng.<br>NORA<br>H<br>(Noise-<br>related<br>annoya<br>nce,<br>cognitio |              | Age:<br>≥ 40 years<br><br>No. of cases / no. of controls:<br>N <sub>cases</sub> = 77,295<br>N <sub>controls</sub> = 578,246<br><br>Time of recruitment /<br>follow-up:<br>2006-2010<br><br>Response rate (%):<br>90.5% of cases and 90.7% of<br>controls<br>(= data linkage<br>diagnoses-noise) | cases 2006-2010                                   | Railway and<br>road traffic<br><br>L <sub>eq, 24h</sub><br>L <sub>N</sub> (22-06h)<br>and other night<br>segments<br>Sound levels<br>calculated by<br>using estimates<br>of traffic<br>exposure and<br>estimating<br>sound<br>reductions<br>between source<br>of sound and | continuo<br>us<br>analysis:<br>35 dB (all<br>values<br>below<br>40dB set<br>to 35dB) | ≥55<60<br><br>≥60<65<br><br>≥65<70 | 1.09<br>(1.02-1.16<br>)<br>0.71<br>(0.38-1.31<br>)<br>- | 1,395<br><br>11<br><br>0 | 11,043<br><br>155<br><br>0    | education, job title<br><br>strengths/<br>weaknesses:<br>+ adequate definition<br>of cases<br>+ adequate exposure<br>assessment<br>+ consideration of<br>maximum nightly<br>aircraft levels (NAT6)<br>+ adequate definition<br>of outcome disease<br>(ICD classification)<br>+ high number of<br>cases and controls |
|                                                                                                                                                              |              |                                                                                                                                                                                                                                                                                                 |                                                   |                                                                                                                                                                                                                                                                            | Noise<br>level<br>(dB)<br><40,                                                       |                                    | Aircraft: L <sub>N</sub><br>OR<br>(95% CI)<br><br>1.00  | Case<br>(n)<br><br>33,82 | Contro<br>l (n)<br><br>268,29 |                                                                                                                                                                                                                                                                                                                     |

| Reference<br>(First author, publication year, S/N)<br>Meta-analysis                                                 | Study design | Population                                                                                                                                                                                                                                       | Outcome                                           | Exposure                                                                                                      |                                                                       |                                                                                                                                    | Results                                                      | Comments<br>(study quality [overall assessment according to SIGN/CASP], conflict of interest [stated vs. not stated], funding [financed from public funds vs. financed from industry], confounding, strengths / weaknesses [potential bias, over- or underestimation of potential effects]) |                                                                                                                                                                                                           |
|---------------------------------------------------------------------------------------------------------------------|--------------|--------------------------------------------------------------------------------------------------------------------------------------------------------------------------------------------------------------------------------------------------|---------------------------------------------------|---------------------------------------------------------------------------------------------------------------|-----------------------------------------------------------------------|------------------------------------------------------------------------------------------------------------------------------------|--------------------------------------------------------------|---------------------------------------------------------------------------------------------------------------------------------------------------------------------------------------------------------------------------------------------------------------------------------------------|-----------------------------------------------------------------------------------------------------------------------------------------------------------------------------------------------------------|
|                                                                                                                     |              | Study region<br>Sample population<br>Sample size (M, F, M+F):<br>Age (mean, range)<br>No. of cases / no. of controls or exposed/unexposed<br>Time of recruitment / follow-up (mean, range)<br>Response (%)<br>(baseline minus loss to follow-up) | Disease (ICD-10)<br>Prescription<br>Questionnaire | exposure source                                                                                               | exposure assessment                                                   | exposure levels                                                                                                                    |                                                              |                                                                                                                                                                                                                                                                                             |                                                                                                                                                                                                           |
| n and health):<br>Verkehrslärmwirkungskunde<br>n im Flughafenmfe<br>ld.<br>Endbericht,<br>Band 6,<br>2nd ed.<br>Yes |              |                                                                                                                                                                                                                                                  |                                                   | and the immission sites according to the methods for calculation (VBUS, BUSCH) used for noise mapping + NAT-6 | max <50<br><40,<br>max<br>≥50<br>≥40<45<br>≥45<50<br>≥50<55<br>≥55<60 | 1.07<br>(1.05-1.09)<br>)<br>1.16<br>(1.13-1.18)<br>)<br>1.16<br>(1.13-1.20)<br>)<br>1.06<br>(1.01-1.12)<br>)<br>0.72<br>(0.56-0.93 | 8<br>20,99<br>0<br>13,81<br>9<br>6,358<br>2,234<br>66<br>855 | 0<br>152,04<br>7<br>94,846<br>9<br>44,856<br>17,352<br>855                                                                                                                                                                                                                                  | - limited differentiation between incident and prevalent cases, therefore temporality cannot be totally established<br>- lack of adjustment for air pollutants (particularly relevant for aircraft noise) |



| Referen<br>ce<br>(First<br>author,<br>publica<br>tion<br>year,<br>S/N)<br>Meta-a<br>nalysis | Study<br>desig<br>n | Population                                                                                                                                                                                                                                                | Outcome                                           | Exposure           |                        |                    | Results                   | Comments<br>(study quality<br>[overall assessment<br>according to<br>SIGN/CASP],<br>conflict of interest<br>[stated vs. not stated],<br>funding [financed<br>from public funds vs.<br>financed from<br>industry],<br>confounding,<br>strengths /<br>weaknesses<br>[potential bias, over-<br>or underestimation of<br>potential effects]) |
|---------------------------------------------------------------------------------------------|---------------------|-----------------------------------------------------------------------------------------------------------------------------------------------------------------------------------------------------------------------------------------------------------|---------------------------------------------------|--------------------|------------------------|--------------------|---------------------------|------------------------------------------------------------------------------------------------------------------------------------------------------------------------------------------------------------------------------------------------------------------------------------------------------------------------------------------|
|                                                                                             |                     | Study region<br>Sample population<br>Sample size (M, F, M+F):<br>Age (mean, range)<br>No. of cases / no. of controls<br>or exposed/unexposed<br>Time of recruitment /<br>follow-up (mean, range)<br>Response (%)<br>(baseline minus loss to<br>follow-up) | Disease (ICD-10)<br>Prescription<br>Questionnaire | exposure<br>source | exposure<br>assessment | exposure<br>levels |                           |                                                                                                                                                                                                                                                                                                                                          |
|                                                                                             |                     |                                                                                                                                                                                                                                                           |                                                   |                    |                        |                    | )                         |                                                                                                                                                                                                                                                                                                                                          |
|                                                                                             |                     |                                                                                                                                                                                                                                                           |                                                   |                    |                        |                    | ≥50<55<br>(1.06-1.12      | 14,10<br>3<br>101,54<br>9                                                                                                                                                                                                                                                                                                                |
|                                                                                             |                     |                                                                                                                                                                                                                                                           |                                                   |                    |                        |                    | )<br>≥55<60<br>(1.01-1.08 | 8,359<br>62,994                                                                                                                                                                                                                                                                                                                          |
|                                                                                             |                     |                                                                                                                                                                                                                                                           |                                                   |                    |                        |                    | )<br>≥60<65<br>(1.08-1.16 | 6,648<br>46,826                                                                                                                                                                                                                                                                                                                          |
|                                                                                             |                     |                                                                                                                                                                                                                                                           |                                                   |                    |                        |                    | )<br>≥65<70<br>(1.08-1.17 | 4,540<br>31,955                                                                                                                                                                                                                                                                                                                          |
|                                                                                             |                     |                                                                                                                                                                                                                                                           |                                                   |                    |                        |                    | )<br>≥70<br>(1.10-1.25    | 1,338<br>8,865                                                                                                                                                                                                                                                                                                                           |

| Reference<br>(First author, publication year, S/N)<br>Meta-analysis | Study design | Population                                                                                                                                                                                                                                       | Outcome                                           | Exposure        |                     |                 | Results | Comments<br>(study quality [overall assessment according to SIGN/CASP], conflict of interest [stated vs. not stated], funding [financed from public funds vs. financed from industry], confounding, strengths / weaknesses [potential bias, over- or underestimation of potential effects]) |
|---------------------------------------------------------------------|--------------|--------------------------------------------------------------------------------------------------------------------------------------------------------------------------------------------------------------------------------------------------|---------------------------------------------------|-----------------|---------------------|-----------------|---------|---------------------------------------------------------------------------------------------------------------------------------------------------------------------------------------------------------------------------------------------------------------------------------------------|
|                                                                     |              | Study region<br>Sample population<br>Sample size (M, F, M+F):<br>Age (mean, range)<br>No. of cases / no. of controls or exposed/unexposed<br>Time of recruitment / follow-up (mean, range)<br>Response (%)<br>(baseline minus loss to follow-up) | Disease (ICD-10)<br>Prescription<br>Questionnaire | exposure source | exposure assessment | exposure levels |         |                                                                                                                                                                                                                                                                                             |

Continuous: 1.037 95% CI 1.028-1.046), p< 0.001

| Noise level (dB) | Road traffic: LN |          |             |
|------------------|------------------|----------|-------------|
|                  | OR (95% CI)      | Case (n) | Control (n) |
| <40, max <50     | 1.00             | 30,420   | 236,396     |
| ≥40<45           | 1.03 (1.01-1.05) | 15,822   | 117,229     |
| ≥45<50           | 1.04             | 12,40    | 90,574      |

| Reference<br>(First author, publication year, S/N)<br>Meta-analysis | Study design | Population                                                                                                                                                                                                                                       | Outcome                                           | Exposure        |                     |                 | Results                                                           | Comments<br>(study quality [overall assessment according to SIGN/CASP], conflict of interest [stated vs. not stated], funding [financed from public funds vs. financed from industry], confounding, strengths / weaknesses [potential bias, over- or underestimation of potential effects]) |
|---------------------------------------------------------------------|--------------|--------------------------------------------------------------------------------------------------------------------------------------------------------------------------------------------------------------------------------------------------|---------------------------------------------------|-----------------|---------------------|-----------------|-------------------------------------------------------------------|---------------------------------------------------------------------------------------------------------------------------------------------------------------------------------------------------------------------------------------------------------------------------------------------|
|                                                                     |              | Study region<br>Sample population<br>Sample size (M, F, M+F):<br>Age (mean, range)<br>No. of cases / no. of controls or exposed/unexposed<br>Time of recruitment / follow-up (mean, range)<br>Response (%)<br>(baseline minus loss to follow-up) | Disease (ICD-10)<br>Prescription<br>Questionnaire | exposure source | exposure assessment | exposure levels |                                                                   |                                                                                                                                                                                                                                                                                             |
|                                                                     |              |                                                                                                                                                                                                                                                  |                                                   |                 |                     |                 | (1.01-1.06 )<br>7                                                 |                                                                                                                                                                                                                                                                                             |
|                                                                     |              |                                                                                                                                                                                                                                                  |                                                   |                 |                     |                 | ≥50<55 1.03 8,912 65,645<br>(1.01-1.06 )                          |                                                                                                                                                                                                                                                                                             |
|                                                                     |              |                                                                                                                                                                                                                                                  |                                                   |                 |                     |                 | ≥55<60 1.07 6,445 45,856<br>(1.04-1.10 )                          |                                                                                                                                                                                                                                                                                             |
|                                                                     |              |                                                                                                                                                                                                                                                  |                                                   |                 |                     |                 | ≥60 1.11 3,289 22,546<br>(1.06-1.15 )                             |                                                                                                                                                                                                                                                                                             |
|                                                                     |              |                                                                                                                                                                                                                                                  |                                                   |                 |                     |                 | Railway: Leq<br>Noise level (dB) OR (95% CI) Case (n) Control (n) |                                                                                                                                                                                                                                                                                             |



| Reference<br>(First author, publication year, S/N)<br>Meta-analysis | Study design | Population                                                                                                                                                                                                                                       | Outcome                                           | Exposure        |                     |                 | Results      | Comments<br>(study quality [overall assessment according to SIGN/CASP], conflict of interest [stated vs. not stated], funding [financed from public funds vs. financed from industry], confounding, strengths / weaknesses [potential bias, over- or underestimation of potential effects]) |        |         |  |  |
|---------------------------------------------------------------------|--------------|--------------------------------------------------------------------------------------------------------------------------------------------------------------------------------------------------------------------------------------------------|---------------------------------------------------|-----------------|---------------------|-----------------|--------------|---------------------------------------------------------------------------------------------------------------------------------------------------------------------------------------------------------------------------------------------------------------------------------------------|--------|---------|--|--|
|                                                                     |              | Study region<br>Sample population<br>Sample size (M, F, M+F):<br>Age (mean, range)<br>No. of cases / no. of controls or exposed/unexposed<br>Time of recruitment / follow-up (mean, range)<br>Response (%)<br>(baseline minus loss to follow-up) | Disease (ICD-10)<br>Prescription<br>Questionnaire | exposure source | exposure assessment | exposure levels |              |                                                                                                                                                                                                                                                                                             |        |         |  |  |
|                                                                     |              |                                                                                                                                                                                                                                                  |                                                   |                 |                     |                 | <40, max <50 | 1.00                                                                                                                                                                                                                                                                                        | 40,213 | 314,545 |  |  |
|                                                                     |              |                                                                                                                                                                                                                                                  |                                                   |                 |                     |                 | ≥40<45       | 1.03<br>(1.00-1.05)                                                                                                                                                                                                                                                                         | 9,652  | 71,811  |  |  |
|                                                                     |              |                                                                                                                                                                                                                                                  |                                                   |                 |                     |                 | ≥45<50       | 1.11<br>(1.09-1.14)                                                                                                                                                                                                                                                                         | 12,929 | 89,372  |  |  |
|                                                                     |              |                                                                                                                                                                                                                                                  |                                                   |                 |                     |                 | ≥50<55       | 1.13<br>(1.10-1.15)                                                                                                                                                                                                                                                                         | 8,925  | 61,695  |  |  |
|                                                                     |              |                                                                                                                                                                                                                                                  |                                                   |                 |                     |                 | ≥55<60       | 1.06<br>(1.02-1.10)                                                                                                                                                                                                                                                                         | 3,362  | 24,862  |  |  |

| Reference<br>(First author, publication year, S/N)<br>Meta-analysis | Study design | Population                                                                                                                                                                                                                                       | Outcome                                           | Exposure        |                     |                 | Results                                                                                                                                                                                                                                                        | Comments<br>(study quality [overall assessment according to SIGN/CASP], conflict of interest [stated vs. not stated], funding [financed from public funds vs. financed from industry], confounding, strengths / weaknesses [potential bias, over- or underestimation of potential effects]) |
|---------------------------------------------------------------------|--------------|--------------------------------------------------------------------------------------------------------------------------------------------------------------------------------------------------------------------------------------------------|---------------------------------------------------|-----------------|---------------------|-----------------|----------------------------------------------------------------------------------------------------------------------------------------------------------------------------------------------------------------------------------------------------------------|---------------------------------------------------------------------------------------------------------------------------------------------------------------------------------------------------------------------------------------------------------------------------------------------|
|                                                                     |              | Study region<br>Sample population<br>Sample size (M, F, M+F):<br>Age (mean, range)<br>No. of cases / no. of controls or exposed/unexposed<br>Time of recruitment / follow-up (mean, range)<br>Response (%)<br>(baseline minus loss to follow-up) | Disease (ICD-10)<br>Prescription<br>Questionnaire | exposure source | exposure assessment | exposure levels |                                                                                                                                                                                                                                                                |                                                                                                                                                                                                                                                                                             |
|                                                                     |              |                                                                                                                                                                                                                                                  |                                                   |                 |                     |                 | ≥60<65 1.15 1,371 9,371<br>(1.08-1.22)<br>)<br>≥65<70 1.07 556 4,129<br>(0.98-1.17)<br>)<br>≥70 0.93 287 2,461<br>(0.82-1.06)<br>)<br>Railway: L <sub>N</sub><br>Noise OR Case Contro<br>level (95% CI) (n) l (n)<br>(dB)<br><40, 1.00 39,83 312,27<br>max 4 0 |                                                                                                                                                                                                                                                                                             |



| Reference<br>(First author, publication year, S/N)<br>Meta-analysis | Study design | Population                                                                                                                                                                                                                                       | Outcome                                           | Exposure        |                     |                 | Results | Comments<br>(study quality [overall assessment according to SIGN/CASP], conflict of interest [stated vs. not stated], funding [financed from public funds vs. financed from industry], confounding, strengths / weaknesses [potential bias, over- or underestimation of potential effects]) |
|---------------------------------------------------------------------|--------------|--------------------------------------------------------------------------------------------------------------------------------------------------------------------------------------------------------------------------------------------------|---------------------------------------------------|-----------------|---------------------|-----------------|---------|---------------------------------------------------------------------------------------------------------------------------------------------------------------------------------------------------------------------------------------------------------------------------------------------|
|                                                                     |              | Study region<br>Sample population<br>Sample size (M, F, M+F):<br>Age (mean, range)<br>No. of cases / no. of controls or exposed/unexposed<br>Time of recruitment / follow-up (mean, range)<br>Response (%)<br>(baseline minus loss to follow-up) | Disease (ICD-10)<br>Prescription<br>Questionnaire | exposure source | exposure assessment | exposure levels |         |                                                                                                                                                                                                                                                                                             |

Subanalysis: Including only subjects with known socio-economic state:  
*Aircraft*: reversed U-shape disappeared for 24 h sound levels, but remained – albeit less distinct – in the analysis of the night time periods.  
 Higher ORs (50 to < 55 dB noise category: 1.35 (95% CI= 1.28-1.43) and above 60 dB: 1.37 (95% CI 0.65–2.91)).  
*Road traffic*: Higher ORs (65 and < 70 dB:1.25 (95% CI=1.17–1.33) and 5.2% increase per 10 dB for continuous noise)  
*Railway*: comparable to main analysis

| Reference<br>(First author, publication year, S/N)<br>Meta-analysis | Study design | Population                                                                                                                                                                                                                                       | Outcome                                           | Exposure        |                              |                     | Results                                                                                                                                                                                                                                                                                                                                                                                                            | Comments<br>(study quality [overall assessment according to SIGN/CASP], conflict of interest [stated vs. not stated], funding [financed from public funds vs. financed from industry], confounding, strengths / weaknesses [potential bias, over- or underestimation of potential effects]) |
|---------------------------------------------------------------------|--------------|--------------------------------------------------------------------------------------------------------------------------------------------------------------------------------------------------------------------------------------------------|---------------------------------------------------|-----------------|------------------------------|---------------------|--------------------------------------------------------------------------------------------------------------------------------------------------------------------------------------------------------------------------------------------------------------------------------------------------------------------------------------------------------------------------------------------------------------------|---------------------------------------------------------------------------------------------------------------------------------------------------------------------------------------------------------------------------------------------------------------------------------------------|
|                                                                     |              | Study region<br>Sample population<br>Sample size (M, F, M+F):<br>Age (mean, range)<br>No. of cases / no. of controls or exposed/unexposed<br>Time of recruitment / follow-up (mean, range)<br>Response (%)<br>(baseline minus loss to follow-up) | Disease (ICD-10)<br>Prescription<br>Questionnaire | exposure source | exposure assessment          | exposure levels     |                                                                                                                                                                                                                                                                                                                                                                                                                    |                                                                                                                                                                                                                                                                                             |
|                                                                     |              |                                                                                                                                                                                                                                                  |                                                   |                 |                              |                     | <p>Combined exposure lower ORs and similar exposure-risk relations. + a reference group without any type of traffic noise exposure of 40 dB or more (and excluding maximum nightly aircraft noise of 50 dB or more): Risk estimates higher than for any of the separate traffic noise exposure categories: Combined exposure to all three types of traffic noise resulted in an OR of 1.42 (95% CI=1.33–1.52).</p> |                                                                                                                                                                                                                                                                                             |
| Stansfeld, S.                                                       | Longitudinal | Study region: Caerphilly                                                                                                                                                                                                                         | Psychiatric caseness                              | Road traffic    | L <sub>eq,16h</sub> (06-22h) | 51-55 dB, 56-60 dB, | Association between road traffic noise level and psychiatric disorder                                                                                                                                                                                                                                                                                                                                              | study quality: + (for cross-sectional                                                                                                                                                                                                                                                       |

| Reference<br>(First author, publication year, S/N)<br>Meta-analysis                                 | Study design | Population                                                                                                                                                                                                                                                                 | Outcome                                                                                                                                                                  | Exposure        |                     |                                                         | Results                                                                                                                                                                                                                                                                                                                                                                                                                            | Comments<br>(study quality [overall assessment according to SIGN/CASP], conflict of interest [stated vs. not stated], funding [financed from public funds vs. financed from industry], confounding, strengths / weaknesses [potential bias, over- or underestimation of potential effects]) |
|-----------------------------------------------------------------------------------------------------|--------------|----------------------------------------------------------------------------------------------------------------------------------------------------------------------------------------------------------------------------------------------------------------------------|--------------------------------------------------------------------------------------------------------------------------------------------------------------------------|-----------------|---------------------|---------------------------------------------------------|------------------------------------------------------------------------------------------------------------------------------------------------------------------------------------------------------------------------------------------------------------------------------------------------------------------------------------------------------------------------------------------------------------------------------------|---------------------------------------------------------------------------------------------------------------------------------------------------------------------------------------------------------------------------------------------------------------------------------------------|
|                                                                                                     |              | Study region<br>Sample population<br>Sample size (M, F, M+F):<br>Age (mean, range)<br>No. of cases / no. of controls or exposed/unexposed<br>Time of recruitment / follow-up (mean, range)<br>Response (%)<br>(baseline minus loss to follow-up)                           | Disease (ICD-10)<br>Prescription<br>Questionnaire                                                                                                                        | exposure source | exposure assessment | exposure levels                                         |                                                                                                                                                                                                                                                                                                                                                                                                                                    |                                                                                                                                                                                                                                                                                             |
| 1996, 2441, UK<br>Yes<br>sum score/<br>No<br>subscores (only means given)<br><br>Evaluated together | study        | Sample population:<br>From Caerphilly collaborative heart study, men aged 50-64 years living in Caerphilly and its environs<br><br>Sample size:<br>(only male)<br>N=2,398<br>5-year follow-up:<br>N=1,725<br><br>Age:<br>50-64 years<br><br>No of cases/ no of controls: / | GHQ 30<br>- Sum score<br>Psychiatric caseness:<br>threshold 4/5<br>-Anxiety subscale<br>-Depression subscale<br>(validated against psychiatric interview in a subsample) | noise           |                     | 61-65 dB,<br>66-70 dB<br><br>No noise value under 51 dB | (from Table 1)<br><br>GHQ adjusted for age, social class, employment status, marital status, physical ill health, and baseline GHQ score (n = 1,590). Values are mean (SE) score on GHQ<br>51-55 dB: 2.57 (0.21), n = 1,218<br>56-60 dB: 3.37 (0.39), n = 153<br>61-65 dB: 2.65 (0.34), n = 233<br>66-70 dB: 2.96 (0.46), n = 104<br>(p-value for test of heterogeneity: 0.29)<br><br>Psychiatric caseness (% scoring ≥ 5 on GHQ): | analysis: -)<br><br>conflict of interest: none<br><br>funding: Medical Research Council<br><br>confounding (controlled for): age, social class, employment status, noise sensitivity<br>(anxiety/depression at baseline) and marital                                                        |

| Reference<br>(First author, publication year, S/N)<br>Meta-analysis | Study design | Population                                                                                                                                                                                                                                                                                                             | Outcome                                           | Exposure        |                     |                 | Results                                                                                                                                                                                                                                                                                                                                                                                                                                                          | Comments<br>(study quality [overall assessment according to SIGN/CASP], conflict of interest [stated vs. not stated], funding [financed from public funds vs. financed from industry], confounding, strengths / weaknesses [potential bias, over- or underestimation of potential effects])            |
|---------------------------------------------------------------------|--------------|------------------------------------------------------------------------------------------------------------------------------------------------------------------------------------------------------------------------------------------------------------------------------------------------------------------------|---------------------------------------------------|-----------------|---------------------|-----------------|------------------------------------------------------------------------------------------------------------------------------------------------------------------------------------------------------------------------------------------------------------------------------------------------------------------------------------------------------------------------------------------------------------------------------------------------------------------|--------------------------------------------------------------------------------------------------------------------------------------------------------------------------------------------------------------------------------------------------------------------------------------------------------|
|                                                                     |              | Study region<br>Sample population<br>Sample size (M, F, M+F):<br>Age (mean, range)<br>No. of cases / no. of controls or exposed/unexposed<br>Time of recruitment / follow-up (mean, range)<br>Response (%)<br>(baseline minus loss to follow-up)                                                                       | Disease (ICD-10)<br>Prescription<br>Questionnaire | exposure source | exposure assessment | exposure levels |                                                                                                                                                                                                                                                                                                                                                                                                                                                                  |                                                                                                                                                                                                                                                                                                        |
| r with Stansfeld 1993 (2453)                                        |              | Time of recruitment/<br>follow-up:<br>Time of recruitment missing*<br>follow-up 5 years later<br><br>Response:<br>response at baseline= 89%<br>no information about baseline population (also not in original paper: Caerphilly and Speedwell collaborative heart disease studies. 1984)<br><br>Loss to follow-up= 23% |                                                   |                 |                     |                 | 51-55 dB: 22.5, n = 1,218<br>56-60 dB: 32.0, n = 153<br>61-65 dB: 24.9, n = 233<br>66-70 dB: 25.0, n = 104<br>(p-value for test of heterogeneity: 0.29)<br><br>Mean (SE) anxiety score adjusted for age, social class, and noise sensitivity and anxiety at baseline (n = 1583)<br>51-55 dB: 4.70 (0.07), n = 1,218<br>56-60 dB: 5.20 (0.18), n = 153<br>61-65 dB: 4.89 (0.15), n = 233<br>66-70 dB: 5.02 (0.21), n = 104<br>(p-value for test of heterogeneity: | status and physical ill health for GHQ<br><br>strengths,<br>weaknesses:<br>+longitudinal study (follow-up 5 years)<br>+good response, low loss to follow up<br>+ power calculation<br>+non-responder analysis<br>- age restriction 50-64, (Caerphilly sample 30-69 years): anxiety disorders “start in |

| Reference<br>(First author, publication year, S/N)<br>Meta-analysis | Study design | Population                                                                                                                                                                                                                                       | Outcome                                           | Exposure        |                     |                 | Results                                                                                                                                                                                                                                                                                                                     | Comments<br>(study quality [overall assessment according to SIGN/CASP], conflict of interest [stated vs. not stated], funding [financed from public funds vs. financed from industry], confounding, strengths / weaknesses [potential bias, over- or underestimation of potential effects]) |
|---------------------------------------------------------------------|--------------|--------------------------------------------------------------------------------------------------------------------------------------------------------------------------------------------------------------------------------------------------|---------------------------------------------------|-----------------|---------------------|-----------------|-----------------------------------------------------------------------------------------------------------------------------------------------------------------------------------------------------------------------------------------------------------------------------------------------------------------------------|---------------------------------------------------------------------------------------------------------------------------------------------------------------------------------------------------------------------------------------------------------------------------------------------|
|                                                                     |              | Study region<br>Sample population<br>Sample size (M, F, M+F):<br>Age (mean, range)<br>No. of cases / no. of controls or exposed/unexposed<br>Time of recruitment / follow-up (mean, range)<br>Response (%)<br>(baseline minus loss to follow-up) | Disease (ICD-10)<br>Prescription<br>Questionnaire | exposure source | exposure assessment | exposure levels |                                                                                                                                                                                                                                                                                                                             |                                                                                                                                                                                                                                                                                             |
|                                                                     |              |                                                                                                                                                                                                                                                  |                                                   |                 |                     |                 | 0.03)<br><br>Mean (SE) depression score, adjusted for age, social class, and noise sensitivity and depression at baseline (n = 1587)<br>51-55 dB: 1.19 (0.05), n = 1,218<br>56-60 dB: 1.39 (0.13), n = 153<br>61-65 dB: 1.32 (0.11), n = 233<br>66-70 dB: 1.21 (0.16), n = 104<br>(p-value for test of heterogeneity: 0.34) | childhood, adolescence, or early adulthood until they reach a peak in middle age, then tending to decrease again with older age”<br>- generalizability (only men and only Leq)<br>- no other noise exposure considered<br>- air particulate level not considered                            |



| Reference<br>(First author, publication year, S/N)<br>Meta-analysis | Study design          | Population                                                                                                                                                                                                                                       | Outcome                                           | Exposure        |                              |                                                 | Results                                                                                                                                                                                                                                                                                                                                           | Comments<br>(study quality [overall assessment according to SIGN/CASP], conflict of interest [stated vs. not stated], funding [financed from public funds vs. financed from industry], confounding, strengths / weaknesses [potential bias, over- or underestimation of potential effects]) |
|---------------------------------------------------------------------|-----------------------|--------------------------------------------------------------------------------------------------------------------------------------------------------------------------------------------------------------------------------------------------|---------------------------------------------------|-----------------|------------------------------|-------------------------------------------------|---------------------------------------------------------------------------------------------------------------------------------------------------------------------------------------------------------------------------------------------------------------------------------------------------------------------------------------------------|---------------------------------------------------------------------------------------------------------------------------------------------------------------------------------------------------------------------------------------------------------------------------------------------|
|                                                                     |                       | Study region<br>Sample population<br>Sample size (M, F, M+F):<br>Age (mean, range)<br>No. of cases / no. of controls or exposed/unexposed<br>Time of recruitment / follow-up (mean, range)<br>Response (%)<br>(baseline minus loss to follow-up) | Disease (ICD-10)<br>Prescription<br>Questionnaire | exposure source | exposure assessment          | exposure levels                                 |                                                                                                                                                                                                                                                                                                                                                   |                                                                                                                                                                                                                                                                                             |
| Stansfeld, S., 1993, 2453, UK                                       | Cross-sectional study | Study region:<br>Caerphilly<br><br>Study population:<br>Caerphilly Collaborative Heart Disease Study<br><br>Sample size:<br>only males<br>N = 2,398<br><br>Age:<br>50-64 years<br><br>Exposed/Unexposed:<br>see results                          | Psychiatric caseness<br>GHQ-30<br>(threshold ≥ 5) | Road traffic    | L <sub>eq,16h</sub> (06-22h) | 51-55 dB,<br>56-60 dB,<br>61-65 dB,<br>66-70 dB | Traffic noise exposure level and percentage of psychiatric caseness (from Table 4)<br><br>Noise (dB)    Not a case (GHQ 0-4)    Prob. Case (GHQ 5+)    Total (n)<br>51-55    78.7 (1,233)    21.3 (333)    1,566<br>56-60    73.5 (144)    26.5 (52)    196<br>61-65    76.8 (208)    23.3 (63)    271<br>66-70    75.2 (103)    24.8 (34)    137 |                                                                                                                                                                                                                                                                                             |

| Reference<br>(First author, publication year, S/N)<br>Meta-analysis | Study design | Population                                                                                                                                                                                                                                       | Outcome                                           | Exposure        |                     |                 | Results                                                                                                                                                     | Comments<br>(study quality [overall assessment according to SIGN/CASP], conflict of interest [stated vs. not stated], funding [financed from public funds vs. financed from industry], confounding, strengths / weaknesses [potential bias, over- or underestimation of potential effects]) |
|---------------------------------------------------------------------|--------------|--------------------------------------------------------------------------------------------------------------------------------------------------------------------------------------------------------------------------------------------------|---------------------------------------------------|-----------------|---------------------|-----------------|-------------------------------------------------------------------------------------------------------------------------------------------------------------|---------------------------------------------------------------------------------------------------------------------------------------------------------------------------------------------------------------------------------------------------------------------------------------------|
|                                                                     |              | Study region<br>Sample population<br>Sample size (M, F, M+F):<br>Age (mean, range)<br>No. of cases / no. of controls or exposed/unexposed<br>Time of recruitment / follow-up (mean, range)<br>Response (%)<br>(baseline minus loss to follow-up) | Disease (ICD-10)<br>Prescription<br>Questionnaire | exposure source | exposure assessment | exposure levels |                                                                                                                                                             |                                                                                                                                                                                                                                                                                             |
|                                                                     |              | Time of recruitment/<br>follow-up:<br>"Established in the early 1980's" first follow-up 5 years later                                                                                                                                            |                                                   |                 |                     |                 | Total 1,688 482 2,170<br>Mantel Haenszel x2 trend = 1.87 (p=0.17)                                                                                           |                                                                                                                                                                                                                                                                                             |
|                                                                     |              | Response rate: no information                                                                                                                                                                                                                    |                                                   |                 |                     |                 | Stratification by sensitivity:<br>Traffic noise and percentage of psychiatric caseness stratified by tertiles of Weinstein Noise Sensitivity (from Table 6) |                                                                                                                                                                                                                                                                                             |
|                                                                     |              | (Longitudinal study, but baseline was not analyzed) +<br>"At first follow-up the cohort was reconstructed with men new to the area)                                                                                                              |                                                   |                 |                     |                 | Noise sensitivity<br>51-55 56-60 61-65 66-70 Total                                                                                                          |                                                                                                                                                                                                                                                                                             |

| Reference<br>(First author, publication year, S/N)<br>Meta-analysis | Study design | Population                                                                                                                                                                                                                                       | Outcome                                           | Exposure        |                     |                 | Results                                                                                                                          | Comments<br>(study quality [overall assessment according to SIGN/CASP], conflict of interest [stated vs. not stated], funding [financed from public funds vs. financed from industry], confounding, strengths / weaknesses [potential bias, over- or underestimation of potential effects]) |
|---------------------------------------------------------------------|--------------|--------------------------------------------------------------------------------------------------------------------------------------------------------------------------------------------------------------------------------------------------|---------------------------------------------------|-----------------|---------------------|-----------------|----------------------------------------------------------------------------------------------------------------------------------|---------------------------------------------------------------------------------------------------------------------------------------------------------------------------------------------------------------------------------------------------------------------------------------------|
|                                                                     |              | Study region<br>Sample population<br>Sample size (M, F, M+F):<br>Age (mean, range)<br>No. of cases / no. of controls or exposed/unexposed<br>Time of recruitment / follow-up (mean, range)<br>Response (%)<br>(baseline minus loss to follow-up) | Disease (ICD-10)<br>Prescription<br>Questionnaire | exposure source | exposure assessment | exposure levels |                                                                                                                                  |                                                                                                                                                                                                                                                                                             |
|                                                                     |              |                                                                                                                                                                                                                                                  |                                                   |                 |                     |                 | 1 <sup>st</sup> 10.2 15.8 18.9 18.4 12.5<br>terti (53/ (12/ (20/ (9/4 (94/<br>le 522 76) 106 9) 753<br>(low ) ) )*)<br>sens<br>) |                                                                                                                                                                                                                                                                                             |
|                                                                     |              |                                                                                                                                                                                                                                                  |                                                   |                 |                     |                 | 2 <sup>nd</sup> 19.8 20.9 22.6 29.6 20.8<br>terti (10 (14/ (19/ (13/ (14<br>le 3/ 67) 84) 44) 9/7<br>521 )<br>)                  |                                                                                                                                                                                                                                                                                             |
|                                                                     |              |                                                                                                                                                                                                                                                  |                                                   |                 |                     |                 | 3 <sup>rd</sup> 33.9 49.0 28.8 27.9 34.0<br>terti (17 (14/ (23/ (12/ (23<br>le 1/ 49) 80) 43) 0/6<br>(hig 505 )<br>h )           |                                                                                                                                                                                                                                                                                             |

| Reference<br>(First author, publication year, S/N)<br>Meta-analysis | Study design                        | Population                                                                                                                                                                                                                                       | Outcome                                                                                                       | Exposure        |                                                                                                                                         |                                                                     | Results                                                                                                                                                                                                                                    | Comments<br>(study quality [overall assessment according to SIGN/CASP], conflict of interest [stated vs. not stated], funding [financed from public funds vs. financed from industry], confounding, strengths / weaknesses [potential bias, over- or underestimation of potential effects]) |
|---------------------------------------------------------------------|-------------------------------------|--------------------------------------------------------------------------------------------------------------------------------------------------------------------------------------------------------------------------------------------------|---------------------------------------------------------------------------------------------------------------|-----------------|-----------------------------------------------------------------------------------------------------------------------------------------|---------------------------------------------------------------------|--------------------------------------------------------------------------------------------------------------------------------------------------------------------------------------------------------------------------------------------|---------------------------------------------------------------------------------------------------------------------------------------------------------------------------------------------------------------------------------------------------------------------------------------------|
|                                                                     |                                     | Study region<br>Sample population<br>Sample size (M, F, M+F):<br>Age (mean, range)<br>No. of cases / no. of controls or exposed/unexposed<br>Time of recruitment / follow-up (mean, range)<br>Response (%)<br>(baseline minus loss to follow-up) | Disease (ICD-10)<br>Prescription<br>Questionnaire                                                             | exposure source | exposure assessment                                                                                                                     | exposure levels                                                     |                                                                                                                                                                                                                                            |                                                                                                                                                                                                                                                                                             |
| Stansfeld, S. 2009, 2442, UK<br>No noise measurements in 3 hours    | Longitudinal before and after study | Study region:<br>Three towns in Clwyd, North Wales<br><br>Sample population:<br>Adults over 16 years living in households, originally recruited for the Respiratory Health Study<br><br>Sample size:                                             | Common Mental Disorder<br>CIS-R<br>(Revised Clinical Interview Schedule)<br><br>Mental Health -GHQ 28 (total) | Road traffic    | -Leq,10-17h<br>-L10 (noise level exceeded for 10% of time of measurement duration)<br><br>(over 3 hours and 15 minutes)<br><br>Baseline | Congested (high noise area)/ non-congested streets (low noise area) | Prevalence of common mental disorder (CIS-R):<br>Baseline:<br>control area: 22.9% (95% CI 12-41)<br>exposed area: 14.9% (95%CI 8-28)<br><br>After bypass opened:<br>control area: 13.6% (95% CI 6-30)<br>exposed area: 10.0% (95% CI 4-26) | study quality: -(to --)<br><br>conflict of interest: stated<br><br>funding: Nil<br><br>confounding (controlled for): no adjustment                                                                                                                                                          |

sens  
)

\*p< 0.05

| Reference<br>(First author, publication year, S/N)<br>Meta-analysis | Study design | Population                                                                                                                                                                                                                                       | Outcome                                           | Exposure                                     |                     |                 | Results                                                                                                                                                                                                                                      | Comments<br>(study quality [overall assessment according to SIGN/CASP], conflict of interest [stated vs. not stated], funding [financed from public funds vs. financed from industry], confounding, strengths / weaknesses [potential bias, over- or underestimation of potential effects])   |
|---------------------------------------------------------------------|--------------|--------------------------------------------------------------------------------------------------------------------------------------------------------------------------------------------------------------------------------------------------|---------------------------------------------------|----------------------------------------------|---------------------|-----------------|----------------------------------------------------------------------------------------------------------------------------------------------------------------------------------------------------------------------------------------------|-----------------------------------------------------------------------------------------------------------------------------------------------------------------------------------------------------------------------------------------------------------------------------------------------|
|                                                                     |              | Study region<br>Sample population<br>Sample size (M, F, M+F):<br>Age (mean, range)<br>No. of cases / no. of controls or exposed/unexposed<br>Time of recruitment / follow-up (mean, range)<br>Response (%)<br>(baseline minus loss to follow-up) | Disease (ICD-10)<br>Prescription<br>Questionnaire | exposure source                              | exposure assessment | exposure levels |                                                                                                                                                                                                                                              |                                                                                                                                                                                                                                                                                               |
| 15 minutes (not standard)                                           |              | At baseline:<br>M+F= 337<br>At follow-up:<br>M+F= 228<br><br>Targeted household sample= 387 households<br><br>Age:<br>16 -90 years<br><br>Exposed/unexposed:<br>exposed (facing main streets):<br>at baseline, M+F= 98<br>at follow-up, M+F= 67  |                                                   | December 1997;<br>Follow-up<br>December 1998 |                     |                 | Mean health outcome scores at baseline unadjusted and adjusted for deprivation in the high noise and control samples (from Table 4)<br><br>Outcome High noise (n=98) Control sample (n=239)<br><br>GHQ adjusted for deprivation 3.2 3.8 0.38 | strengths, weaknesses:<br>- no statistical analysis<br>- no adjustment for confounders<br>- no information on participant characteristics<br>- .9% versus 14.9%)<br>- not clear as to which areas are exposed an unexposed<br>- no other noise exposure considered<br>- air particulate level |

| Reference<br>(First author, publication year, S/N)<br>Meta-analysis | Study design | Population                                                                                                                                                                                                                                                                                                          | Outcome                                           | Exposure        |                     |                 | Results        | Comments<br>(study quality [overall assessment according to SIGN/CASP], conflict of interest [stated vs. not stated], funding [financed from public funds vs. financed from industry], confounding, strengths / weaknesses [potential bias, over- or underestimation of potential effects]) |
|---------------------------------------------------------------------|--------------|---------------------------------------------------------------------------------------------------------------------------------------------------------------------------------------------------------------------------------------------------------------------------------------------------------------------|---------------------------------------------------|-----------------|---------------------|-----------------|----------------|---------------------------------------------------------------------------------------------------------------------------------------------------------------------------------------------------------------------------------------------------------------------------------------------|
|                                                                     |              | Study region<br>Sample population<br>Sample size (M, F, M+F):<br>Age (mean, range)<br>No. of cases / no. of controls or exposed/unexposed<br>Time of recruitment / follow-up (mean, range)<br>Response (%)<br>(baseline minus loss to follow-up)                                                                    | Disease (ICD-10)<br>Prescription<br>Questionnaire | exposure source | exposure assessment | exposure levels |                |                                                                                                                                                                                                                                                                                             |
|                                                                     |              | unexposed<br>(uncongested streets):<br>at baseline, M+F=239<br>at follow-up, M+F=161<br><br>Time of recruitment/<br>follow-up:<br>October/November 1997/<br>October–November 1998<br>(Bypass opened in March 1998)<br><br>Response:<br>70% at baseline (63% in high noise, 76% in low noise).<br>Loss to follow-up: |                                                   |                 |                     |                 | not considered |                                                                                                                                                                                                                                                                                             |

| Reference<br>(First author, publication year, S/N)<br>Meta-analysis | Study design    | Population                                                                                                                                                                                                                                                                                        | Outcome                                           | Exposure                  |                                       |                      | Results                                                                                        | Comments<br>(study quality [overall assessment according to SIGN/CASP], conflict of interest [stated vs. not stated], funding [financed from public funds vs. financed from industry], confounding, strengths / weaknesses [potential bias, over- or underestimation of potential effects]) |
|---------------------------------------------------------------------|-----------------|---------------------------------------------------------------------------------------------------------------------------------------------------------------------------------------------------------------------------------------------------------------------------------------------------|---------------------------------------------------|---------------------------|---------------------------------------|----------------------|------------------------------------------------------------------------------------------------|---------------------------------------------------------------------------------------------------------------------------------------------------------------------------------------------------------------------------------------------------------------------------------------------|
|                                                                     |                 | Study region<br>Sample population<br>Sample size (M, F, M+F):<br>Age (mean, range)<br>No. of cases / no. of controls or exposed/unexposed<br>Time of recruitment / follow-up (mean, range)<br>Response (%)<br>(baseline minus loss to follow-up)                                                  | Disease (ICD-10)<br>Prescription<br>Questionnaire | exposure source           | exposure assessment                   | exposure levels      |                                                                                                |                                                                                                                                                                                                                                                                                             |
|                                                                     |                 | 26% (low noise: 22%, high noise 31%)<br><br>(Sample originally recruited from the Respiratory Health Study: Burr ML, Karani G, Davies B, Holmes BA, Williams KL. Effects on respiratory health of a reduction in air pollution from vehicle exhaust emissions. Occup Environ Med 2004; 61:212-8.) |                                                   |                           |                                       |                      |                                                                                                |                                                                                                                                                                                                                                                                                             |
| Stansfeld, 2009, 2447.                                              | Cross-sectional | Study region:<br>Area around Heathrow airport (London), Schiphol                                                                                                                                                                                                                                  | Psychological morbidity:<br>Strength and          | Aircraft and road traffic | Noise exposure assessments at schools | 30-77dB for aircraft | Exposure to aircraft noise traffic in dB and mental health outcomes (Table 2)<br><br>□ p-value | Study quality<br>-(to +)                                                                                                                                                                                                                                                                    |

| Reference<br>(First author, publication year, S/N)<br>Meta-analysis | Study design | Population                                                                                                                                                                                                                                                                                                                                                                                                       | Outcome                                                                                                                                                                                      | Exposure        |                                                                                                                                                                                   |                                                                | Results                                                                                                                                             | Comments<br>(study quality [overall assessment according to SIGN/CASP], conflict of interest [stated vs. not stated], funding [financed from public funds vs. financed from industry], confounding, strengths / weaknesses [potential bias, over- or underestimation of potential effects]) |
|---------------------------------------------------------------------|--------------|------------------------------------------------------------------------------------------------------------------------------------------------------------------------------------------------------------------------------------------------------------------------------------------------------------------------------------------------------------------------------------------------------------------|----------------------------------------------------------------------------------------------------------------------------------------------------------------------------------------------|-----------------|-----------------------------------------------------------------------------------------------------------------------------------------------------------------------------------|----------------------------------------------------------------|-----------------------------------------------------------------------------------------------------------------------------------------------------|---------------------------------------------------------------------------------------------------------------------------------------------------------------------------------------------------------------------------------------------------------------------------------------------|
|                                                                     |              | Study region<br>Sample population<br>Sample size (M, F, M+F):<br>Age (mean, range)<br>No. of cases / no. of controls or exposed/unexposed<br>Time of recruitment / follow-up (mean, range)<br>Response (%)<br>(baseline minus loss to follow-up)                                                                                                                                                                 | Disease (ICD-10)<br>Prescription<br>Questionnaire                                                                                                                                            | exposure source | exposure assessment                                                                                                                                                               | exposure levels                                                |                                                                                                                                                     |                                                                                                                                                                                                                                                                                             |
| No (continuous outcome)                                             | study        | Airport (Amsterdam), and Barajas airport (Madrid)<br><br>Study population:<br>RANCH Study<br>Pupils from 89 schools<br>Schools excluded if highly sound insulated or exposed to a different dominant noise source than to aircraft or road traffic noise.<br>Schools classified on a 4x4 grid ranging from low to high for aircraft noise and low to high for road traffic noise.<br>Two schools/country in each | Difficulties Questionnaire (SDQ)<br><br>Hyperactivity/inattention<br>Conduct Problems<br>Emotional symptoms<br>Peer problems<br>Prosocial behavior<br>Total score (hyperactivity, emotional, | noise           | Aircraft noise:<br>Leq,16h (07-23h)<br>noise contours<br><br>Road traffic noise:<br><br>In UK and Spain estimates of road traffic noise based on simplified CRTN noise prediction | noise<br><br>for road traffic noise<br><br>Continuous analysis | (95%CI)<br>Overall difficulties 0.013<br>Hyperactivity (0.001, 0.024)<br>Conduct disorder -0.005<br>Peer Problems 0.004<br>Prosocial behavior 0.002 | Conflict of interest<br>Sponsors had no role in study design, data collection, analysis, interpretation or writing the report<br><br>Funding Public RANCH Study founded by European Community<br>UK co-funding by Department of Environment, Food and Rural Affairs.                        |
|                                                                     |              |                                                                                                                                                                                                                                                                                                                                                                                                                  |                                                                                                                                                                                              |                 |                                                                                                                                                                                   |                                                                | 0.471<br>0.032<br>0.220<br>0.296<br>0.720                                                                                                           |                                                                                                                                                                                                                                                                                             |



| Reference<br>(First author, publication year, S/N)<br>Meta-analysis | Study design | Population                                                                                                                                                                                                                                       | Outcome                                            | Exposure                                                                                                                                                                                                                 |                     |                 | Results                                                                                                                                                                                                                                                                                                                                                                                 | Comments<br>(study quality [overall assessment according to SIGN/CASP], conflict of interest [stated vs. not stated], funding [financed from public funds vs. financed from industry], confounding, strengths / weaknesses [potential bias, over- or underestimation of potential effects]) |                                                                                                                                                                                                                                                        |
|---------------------------------------------------------------------|--------------|--------------------------------------------------------------------------------------------------------------------------------------------------------------------------------------------------------------------------------------------------|----------------------------------------------------|--------------------------------------------------------------------------------------------------------------------------------------------------------------------------------------------------------------------------|---------------------|-----------------|-----------------------------------------------------------------------------------------------------------------------------------------------------------------------------------------------------------------------------------------------------------------------------------------------------------------------------------------------------------------------------------------|---------------------------------------------------------------------------------------------------------------------------------------------------------------------------------------------------------------------------------------------------------------------------------------------|--------------------------------------------------------------------------------------------------------------------------------------------------------------------------------------------------------------------------------------------------------|
|                                                                     |              | Study region<br>Sample population<br>Sample size (M, F, M+F):<br>Age (mean, range)<br>No. of cases / no. of controls or exposed/unexposed<br>Time of recruitment / follow-up (mean, range)<br>Response (%)<br>(baseline minus loss to follow-up) | Disease (ICD-10)<br>Prescription<br>Questionnaire  | exposure source                                                                                                                                                                                                          | exposure assessment | exposure levels |                                                                                                                                                                                                                                                                                                                                                                                         |                                                                                                                                                                                                                                                                                             |                                                                                                                                                                                                                                                        |
|                                                                     |              | noise exposure grid cell<br><br>Sample size:<br>M+F= 2014<br>Not separated by gender<br><br>Age:<br>9-10 years<br><br>Exposed/unexposed:<br>NA<br><br>Time of recruitment/follow-up:<br>Not specified                                            | conduct and peer problems)<br><br>Parental version | method using a combination of proximity to roads.<br>Measurements confirmed these estimates. For Netherlands aircraft and outdoor road traffic noise measurements provided by modelled data lined to school locations by |                     |                 | Emotional Problems Model 2 (-0.009, 0.011)<br>Model 2: adjusted for age, gender, country, mother's education, employment status, crowding, homeownership, long-standing illness, main language spoken at home, parental support, classroom glazing and other noise exposure<br><br>Exposure to road noise traffic in dB and mental health outcomes<br>□ (95%CI)<br>Overall difficulties | 0.785<br><br><br><br><br><br><br><br><br><br>p-value                                                                                                                                                                                                                                        | Netherlands<br>co-founding by the Dutch Ministry of Spatial Planning, Housing and Environment and the Dutch Ministry of Transport, Public Works and Water Management<br><br>Confounding<br>Age, gender, country, mothers education, employment status, |

| Referen<br>ce<br>(First<br>author,<br>publica<br>tion<br>year,<br>S/N)<br>Meta-a<br>nalysis | Study<br>desig<br>n | Population                                                                                                                                                                                                                                                | Outcome                                           | Exposure                                |                        |                            | Results | Comments<br>(study quality<br>[overall assessment<br>according to<br>SIGN/CASP],<br>conflict of interest<br>[stated vs. not stated],<br>funding [financed<br>from public funds vs.<br>financed from<br>industry],<br>confounding,<br>strengths /<br>weaknesses<br>[potential bias, over-<br>or underestimation of<br>potential effects]) |
|---------------------------------------------------------------------------------------------|---------------------|-----------------------------------------------------------------------------------------------------------------------------------------------------------------------------------------------------------------------------------------------------------|---------------------------------------------------|-----------------------------------------|------------------------|----------------------------|---------|------------------------------------------------------------------------------------------------------------------------------------------------------------------------------------------------------------------------------------------------------------------------------------------------------------------------------------------|
|                                                                                             |                     | Study region<br>Sample population<br>Sample size (M, F, M+F):<br>Age (mean, range)<br>No. of cases / no. of controls<br>or exposed/unexposed<br>Time of recruitment /<br>follow-up (mean, range)<br>Response (%)<br>(baseline minus loss to<br>follow-up) | Disease (ICD-10)<br>Prescription<br>Questionnaire | exposure<br>source                      | exposure<br>assessment | exposure<br>levels         |         |                                                                                                                                                                                                                                                                                                                                          |
|                                                                                             |                     | Response rate (%)<br>Overall child response rate:<br>80%<br>Parental response rate: 80%                                                                                                                                                                   |                                                   | geographical<br>information<br>systems. | Model<br>2             | -0.018<br>(-0.049, 0.013)  | 0.275   | crowding,<br>homeownership,<br>illness, main language<br>spoken at home,<br>parental support,<br>classroom glazing                                                                                                                                                                                                                       |
|                                                                                             |                     |                                                                                                                                                                                                                                                           |                                                   |                                         | Model<br>2             | 0.0002<br>(-0.014, 0.014)  | 0.982   | Hyperactivity<br>Conduct disorder<br>classroom glazing                                                                                                                                                                                                                                                                                   |
|                                                                                             |                     |                                                                                                                                                                                                                                                           |                                                   |                                         | Model<br>2             | -0.010<br>(-0.020, -0.001) | 0.033   | Peer Problems<br>Strengths/weaknesses<br>:                                                                                                                                                                                                                                                                                               |
|                                                                                             |                     |                                                                                                                                                                                                                                                           |                                                   |                                         | Model<br>2             | -0.009<br>(-0.019, 0.001)  | 0.072+  | Studied both aircraft<br>and road traffic noise<br>+ Good noise                                                                                                                                                                                                                                                                          |
|                                                                                             |                     |                                                                                                                                                                                                                                                           |                                                   |                                         | Model<br>2             | -0.004<br>(-0.014, 0.007)  | 0.490   | Prosocial behavior<br>exposure assessment<br>+ Confounder list                                                                                                                                                                                                                                                                           |
|                                                                                             |                     |                                                                                                                                                                                                                                                           |                                                   |                                         | Model                  | 0.001                      | 0.828   | Emotional Problems<br>pretty inclusive, but<br>missing air particulate                                                                                                                                                                                                                                                                   |

| Reference<br>(First author, publication year, S/N)<br>Meta-analysis | Study design | Population                                                                                                                                                                                                                                       | Outcome                                           | Exposure        |                     |                 | Results           | Comments<br>(study quality [overall assessment according to SIGN/CASP], conflict of interest [stated vs. not stated], funding [financed from public funds vs. financed from industry], confounding, strengths / weaknesses [potential bias, over- or underestimation of potential effects])                        |
|---------------------------------------------------------------------|--------------|--------------------------------------------------------------------------------------------------------------------------------------------------------------------------------------------------------------------------------------------------|---------------------------------------------------|-----------------|---------------------|-----------------|-------------------|--------------------------------------------------------------------------------------------------------------------------------------------------------------------------------------------------------------------------------------------------------------------------------------------------------------------|
|                                                                     |              | Study region<br>Sample population<br>Sample size (M, F, M+F):<br>Age (mean, range)<br>No. of cases / no. of controls or exposed/unexposed<br>Time of recruitment / follow-up (mean, range)<br>Response (%)<br>(baseline minus loss to follow-up) | Disease (ICD-10)<br>Prescription<br>Questionnaire | exposure source | exposure assessment | exposure levels |                   |                                                                                                                                                                                                                                                                                                                    |
|                                                                     |              |                                                                                                                                                                                                                                                  |                                                   |                 |                     |                 | 2 (-0.011, 0.014) | level<br>+ Good response rate<br>+ all schools matched according to socio-economic status and ethnicity within each country<br>+ study introduced as study on environment and health without explicit mention of noise<br>+ multi-country<br>- Only noise exposure at school considered<br>- cross-sectional study |

| Reference<br>(First author, publication year, S/N)<br>Meta-analysis | Study design          | Population                                                                                                                                                                                                                                       | Outcome                                                                                | Exposure           |                     |                                                                   | Results                                                                                                                                                                             | Comments<br>(study quality [overall assessment according to SIGN/CASP], conflict of interest [stated vs. not stated], funding [financed from public funds vs. financed from industry], confounding, strengths / weaknesses [potential bias, over- or underestimation of potential effects]) |
|---------------------------------------------------------------------|-----------------------|--------------------------------------------------------------------------------------------------------------------------------------------------------------------------------------------------------------------------------------------------|----------------------------------------------------------------------------------------|--------------------|---------------------|-------------------------------------------------------------------|-------------------------------------------------------------------------------------------------------------------------------------------------------------------------------------|---------------------------------------------------------------------------------------------------------------------------------------------------------------------------------------------------------------------------------------------------------------------------------------------|
|                                                                     |                       | Study region<br>Sample population<br>Sample size (M, F, M+F):<br>Age (mean, range)<br>No. of cases / no. of controls or exposed/unexposed<br>Time of recruitment / follow-up (mean, range)<br>Response (%)<br>(baseline minus loss to follow-up) | Disease (ICD-10)<br>Prescription<br>Questionnaire                                      | exposure source    | exposure assessment | exposure levels                                                   |                                                                                                                                                                                     |                                                                                                                                                                                                                                                                                             |
| Sygnå, 2014, 2498<br>Yes                                            | Cross-sectional study | Study region:<br>Oslo, Norway<br><br>Sample population:<br>Data on residential addresses obtained by Norwegian Public Roads Administration and City of Oslo. Using the Norwegian National                                                        | Psychological distress measured by Hopkins Symptoms Checklist-25 (HSCL-25)<br><br>Mean | Road traffic noise | L <sub>DEN</sub>    | Continuous variable<br><br>No start point specified (Figure shows | Association between road traffic noise exposure and Hopkins Symptom Checklist ≥1. (Per 10dB increase in noise, from Table 5)<br>All: 1.05 (0.92, 1.21) (Adjusted model, OR (95%CI)) | Study quality<br>-<br>Cross-sectional<br><br>Conflict of interest<br>No conflict of interest declared.<br><br>Funding                                                                                                                                                                       |

- air particulate level not considered  
- no information on the sampling method (selection)

| Reference<br>(First author, publication year, S/N)<br>Meta-analysis | Study design | Population                                                                                                                                                                                                                                                                     | Outcome                                                                                                                                                                                    | Exposure        |                     |                                 | Results                                                                                                                                                                                                                                  | Comments<br>(study quality [overall assessment according to SIGN/CASP], conflict of interest [stated vs. not stated], funding [financed from public funds vs. financed from industry], confounding, strengths / weaknesses [potential bias, over- or underestimation of potential effects]) |
|---------------------------------------------------------------------|--------------|--------------------------------------------------------------------------------------------------------------------------------------------------------------------------------------------------------------------------------------------------------------------------------|--------------------------------------------------------------------------------------------------------------------------------------------------------------------------------------------|-----------------|---------------------|---------------------------------|------------------------------------------------------------------------------------------------------------------------------------------------------------------------------------------------------------------------------------------|---------------------------------------------------------------------------------------------------------------------------------------------------------------------------------------------------------------------------------------------------------------------------------------------|
|                                                                     |              | Study region<br>Sample population<br>Sample size (M, F, M+F):<br>Age (mean, range)<br>No. of cases / no. of controls or exposed/unexposed<br>Time of recruitment / follow-up (mean, range)<br>Response (%)<br>(baseline minus loss to follow-up)                               | Disease (ICD-10)<br>Prescription<br>Questionnaire                                                                                                                                          | exposure source | exposure assessment | exposure levels                 |                                                                                                                                                                                                                                          |                                                                                                                                                                                                                                                                                             |
|                                                                     |              | Population Register, sampled from residential addresses, 51% males and 49% females from different age strata<br><br>Sample size:<br>M+F=2898<br>M= 1442<br>F= 1456<br><br>Age:<br>≤25 years: 210<br>26-35 years: 469<br>36-50 years: 924<br>51-65 years: 822<br>≥66 years: 472 | psychological distress score used as a continuous variable and used as dichotomized variable for more severe levels of psychosocial stress (probable mental disorder cutoff ≥1.55 on HSCL) |                 |                     | modelled<br>LDEN values < 30dB) | Public Norwegian Research Council and the Norwegian Public Roads Administration<br><br>Confounding Adjusted for sex, age education, employment, noise sensitivity, and somatic diseases<br><br>Strengths/weaknesses :<br>+ good exposure |                                                                                                                                                                                                                                                                                             |

| Reference<br>(First author, publication year, S/N)<br>Meta-analysis | Study design | Population                                                                                                                                                                                                                                       | Outcome                                           | Exposure        |                     |                 | Results | Comments<br>(study quality [overall assessment according to SIGN/CASP], conflict of interest [stated vs. not stated], funding [financed from public funds vs. financed from industry], confounding, strengths / weaknesses [potential bias, over- or underestimation of potential effects]) |
|---------------------------------------------------------------------|--------------|--------------------------------------------------------------------------------------------------------------------------------------------------------------------------------------------------------------------------------------------------|---------------------------------------------------|-----------------|---------------------|-----------------|---------|---------------------------------------------------------------------------------------------------------------------------------------------------------------------------------------------------------------------------------------------------------------------------------------------|
|                                                                     |              | Study region<br>Sample population<br>Sample size (M, F, M+F):<br>Age (mean, range)<br>No. of cases / no. of controls or exposed/unexposed<br>Time of recruitment / follow-up (mean, range)<br>Response (%)<br>(baseline minus loss to follow-up) | Disease (ICD-10)<br>Prescription<br>Questionnaire | exposure source | exposure assessment | exposure levels |         |                                                                                                                                                                                                                                                                                             |
|                                                                     |              | No. of cases<br>HSCL score<br>(probable mental disorder cutoff)<br><1.55: 2,124<br>≥1.55: 528<br><br>Time of recruitment/follow-up:<br>Autumn 2000<br><br>Response (%)<br>60.5%                                                                  |                                                   |                 |                     |                 |         | assessment<br>+ appropriate outcome assessment<br>+ large sample size<br>+ consideration of important confounders<br>- air particulate level not considered<br>- No other noise exposure considered<br>- cross-sectional design<br>- large number of missing values, most linked to         |

| Reference<br>(First author, publication year, S/N)<br>Meta-analysis | Study design                             | Population                                                                                                                                                                                                                                       | Outcome                                                                                       | Exposure           |                                                                                                                |                                                                                     | Results                                                                                                                                        | Comments<br>(study quality [overall assessment according to SIGN/CASP], conflict of interest [stated vs. not stated], funding [financed from public funds vs. financed from industry], confounding, strengths / weaknesses [potential bias, over- or underestimation of potential effects]) |
|---------------------------------------------------------------------|------------------------------------------|--------------------------------------------------------------------------------------------------------------------------------------------------------------------------------------------------------------------------------------------------|-----------------------------------------------------------------------------------------------|--------------------|----------------------------------------------------------------------------------------------------------------|-------------------------------------------------------------------------------------|------------------------------------------------------------------------------------------------------------------------------------------------|---------------------------------------------------------------------------------------------------------------------------------------------------------------------------------------------------------------------------------------------------------------------------------------------|
|                                                                     |                                          | Study region<br>Sample population<br>Sample size (M, F, M+F):<br>Age (mean, range)<br>No. of cases / no. of controls or exposed/unexposed<br>Time of recruitment / follow-up (mean, range)<br>Response (%)<br>(baseline minus loss to follow-up) | Disease (ICD-10)<br>Prescription<br>Questionnaire                                             | exposure source    | exposure assessment                                                                                            | exposure levels                                                                     |                                                                                                                                                |                                                                                                                                                                                                                                                                                             |
| Tzivian, M. 2016, 2586, German -                                    | Cross-sectional analysis of cohort study | Study region:<br>Ruhr area (Bochum, Essen, and Mülheim/Ruhr)<br><br>Sample population:<br>Heinz Nixdorf Recall Study (population-based cohort in the German Ruhr area)                                                                           | Mild cognitive impairment (MCI)<br><br>(Diagnoses according to Petersen, 2004 "Mild cognitive | Road traffic noise | L <sub>DEN</sub><br>L <sub>N</sub> (22-06 h)<br><br>Traffic load at major roads (vehicles × m/day) per 100,000 | Dichotomized with cutpoint at 60 dB (L <sub>DEN</sub> ) and 55 dB (L <sub>N</sub> ) | Associations of noise with MCI, OR (95% CI) per 10dB, from Tables 3 and S2<br><br>Overall MCI 1.40<br>Amnesic MCI 1.53<br>Non-amnesic MCI 1.26 | study quality:<br>+ (to -)<br><br>conflict of interest:<br>none<br><br>funding:<br>German Ministry of                                                                                                                                                                                       |

psychological distress  
→ participants who had not answered the HSCL items satisfactorily were excluded

| Reference<br>(First author, publication year, S/N)<br>Meta-analysis | Study design | Population                                                                                                                                                                                                                                       | Outcome                                                                                            | Exposure        |                                                                                          |                                                                  | Results                                                                                   | Comments<br>(study quality [overall assessment according to SIGN/CASP], conflict of interest [stated vs. not stated], funding [financed from public funds vs. financed from industry], confounding, strengths / weaknesses [potential bias, over- or underestimation of potential effects]) |
|---------------------------------------------------------------------|--------------|--------------------------------------------------------------------------------------------------------------------------------------------------------------------------------------------------------------------------------------------------|----------------------------------------------------------------------------------------------------|-----------------|------------------------------------------------------------------------------------------|------------------------------------------------------------------|-------------------------------------------------------------------------------------------|---------------------------------------------------------------------------------------------------------------------------------------------------------------------------------------------------------------------------------------------------------------------------------------------|
|                                                                     |              | Study region<br>Sample population<br>Sample size (M, F, M+F):<br>Age (mean, range)<br>No. of cases / no. of controls or exposed/unexposed<br>Time of recruitment / follow-up (mean, range)<br>Response (%)<br>(baseline minus loss to follow-up) | Disease (ICD-10)<br>Prescription<br>Questionnaire                                                  | exposure source | exposure assessment                                                                      | exposure levels                                                  |                                                                                           |                                                                                                                                                                                                                                                                                             |
|                                                                     |              | Sample size:<br>At follow-up:<br>M+F=4157<br>Cognitive status available:<br>M+F= 4086<br>Statistical analysis:<br>M+F= 2050<br>Age:<br>50-80 years<br>Exposed/unexposed<br>NA<br>Time of recruitment/                                            | impairment as a diagnostic entity". J Intern Med 256:183–194)<br><br>People with dementia excluded | Modelled in2007 | Sensitivity analysis:<br>a) dichotomized at 65 dB (LDEN) and 50 dB (LN)<br>b) continuous | (from 60 dB) LDEN (from 65 dB)* LN (from 55 dB) LN (from 50 dB)* | (1.03, 1.91) 1.89 (1.10, 3.25) 1.80 (1.07, 3.04) 1.35 (1.00, 1.82) 1.47 1.22 (0.85, 1.85) | Education and Science and by the German Research Council<br><br>confounding (controlled for): Main model: (education), alcohol consumption, smoking status, self-reported passive exposure to tobacco smoke, regular physical activity,                                                     |

\*From sensitivity analysis



| Reference<br>(First author, publication year, S/N)<br>Meta-analysis | Study design | Population                                                                                                                                                                                                                                       | Outcome                                           | Exposure        |                     |                                                                                                                                            | Results                                                                                                                                                                                                                                                                                                                                                                                                                                                                         | Comments<br>(study quality [overall assessment according to SIGN/CASP], conflict of interest [stated vs. not stated], funding [financed from public funds vs. financed from industry], confounding, strengths / weaknesses [potential bias, over- or underestimation of potential effects]) |
|---------------------------------------------------------------------|--------------|--------------------------------------------------------------------------------------------------------------------------------------------------------------------------------------------------------------------------------------------------|---------------------------------------------------|-----------------|---------------------|--------------------------------------------------------------------------------------------------------------------------------------------|---------------------------------------------------------------------------------------------------------------------------------------------------------------------------------------------------------------------------------------------------------------------------------------------------------------------------------------------------------------------------------------------------------------------------------------------------------------------------------|---------------------------------------------------------------------------------------------------------------------------------------------------------------------------------------------------------------------------------------------------------------------------------------------|
|                                                                     |              | Study region<br>Sample population<br>Sample size (M, F, M+F):<br>Age (mean, range)<br>No. of cases / no. of controls or exposed/unexposed<br>Time of recruitment / follow-up (mean, range)<br>Response (%)<br>(baseline minus loss to follow-up) | Disease (ICD-10)<br>Prescription<br>Questionnaire | exposure source | exposure assessment | exposure levels                                                                                                                            |                                                                                                                                                                                                                                                                                                                                                                                                                                                                                 |                                                                                                                                                                                                                                                                                             |
|                                                                     |              | follow-up: 2006-2008<br><br>Baseline response: 53% (Stang et al. 2005)<br><br>Loss-to-follow up: about 15%                                                                                                                                       |                                                   |                 |                     | (startpoint<br>apparently 0 dB)<br><br>c) In 10 dB categories<br>≥ 45 -<br>< 55 dB;<br>≥ 55 -<br>< 65 dB;<br>≥ 65 -<br>< 75 dB;<br>≥ 75 dB | Adjusted for age, sex, SES, alcohol consumption, smoking, self-reported environmental tobacco smoke, regular physical activity, BMI<br><br>Effect modifications:<br>LDEN with MCI: higher susceptibility in carriers of the APOE risk allele [OR = 1.99 (95% CI: 1.11, 3.56)] compared with others [OR = 1.21 (95% CI: 0.83, 1.78); pinter = 0.17] and in participants with high PM <sub>2.5</sub> exposure [OR = 1.53 (95% CI: 1.17, 2.00)] compared with those exposed to low | and BMI<br>Extended analysis: CHD diagnosis, LDL cholesterol level, statin medications, anti-hypertensive medication, city of residence<br>Additional adjustments of main model with APOE ε4 and degree of depressive symptoms.<br>Two exposure models for association of noise and air     |

| Reference<br>(First author, publication year, S/N)<br>Meta-analysis | Population   |                                                                                                                                                                                                                                                  | Outcome                                           | Exposure        |                     |                 | Results                                                                                                                                                                                                                                                                                                                                           | Comments<br>(study quality [overall assessment according to SIGN/CASP], conflict of interest [stated vs. not stated], funding [financed from public funds vs. financed from industry], confounding, strengths / weaknesses [potential bias, over- or underestimation of potential effects]) |
|---------------------------------------------------------------------|--------------|--------------------------------------------------------------------------------------------------------------------------------------------------------------------------------------------------------------------------------------------------|---------------------------------------------------|-----------------|---------------------|-----------------|---------------------------------------------------------------------------------------------------------------------------------------------------------------------------------------------------------------------------------------------------------------------------------------------------------------------------------------------------|---------------------------------------------------------------------------------------------------------------------------------------------------------------------------------------------------------------------------------------------------------------------------------------------|
|                                                                     | Study design | Study region<br>Sample population<br>Sample size (M, F, M+F):<br>Age (mean, range)<br>No. of cases / no. of controls or exposed/unexposed<br>Time of recruitment / follow-up (mean, range)<br>Response (%)<br>(baseline minus loss to follow-up) | Disease (ICD-10)<br>Prescription<br>Questionnaire | exposure source | exposure assessment | exposure levels |                                                                                                                                                                                                                                                                                                                                                   |                                                                                                                                                                                                                                                                                             |
|                                                                     |              |                                                                                                                                                                                                                                                  |                                                   |                 |                     |                 | PM2.5 [OR = 1.08 (95% CI: 0.73, 1.62); pinter = 0.17]<br>No effect modification by age (Figure S1b)<br><br>Sensitivity analysis:<br>-only non-movers: did not change the effect<br>-only objective impairment: slightly lower association<br>-Continuous noise variables (from Table S2):<br>LDEN LN<br>(per (per<br>IQR=14.2 IQR=13.6<br>dB) dB) | pollution<br><br>strengths, weaknesses:<br>+ adequate definition of cases and outcome<br>+ adequate exposure measurement<br>+adequate control for confounders including air pollutants (sensitivity analyses adjusting for PM2.5, PM10, NO2, NOx<br>-Cross-sectional study                  |

| Reference<br>(First author, publication year, S/N)<br>Meta-analysis | Study design | Population                                                                                                                                                                                                                                       | Outcome                                           | Exposure        |                     |                 | Results                                                              | Comments<br>(study quality [overall assessment according to SIGN/CASP], conflict of interest [stated vs. not stated], funding [financed from public funds vs. financed from industry], confounding, strengths / weaknesses [potential bias, over- or underestimation of potential effects]) |                                                                      |                                                                                                                                                                     |
|---------------------------------------------------------------------|--------------|--------------------------------------------------------------------------------------------------------------------------------------------------------------------------------------------------------------------------------------------------|---------------------------------------------------|-----------------|---------------------|-----------------|----------------------------------------------------------------------|---------------------------------------------------------------------------------------------------------------------------------------------------------------------------------------------------------------------------------------------------------------------------------------------|----------------------------------------------------------------------|---------------------------------------------------------------------------------------------------------------------------------------------------------------------|
|                                                                     |              | Study region<br>Sample population<br>Sample size (M, F, M+F):<br>Age (mean, range)<br>No. of cases / no. of controls or exposed/unexposed<br>Time of recruitment / follow-up (mean, range)<br>Response (%)<br>(baseline minus loss to follow-up) | Disease (ICD-10)<br>Prescription<br>Questionnaire | exposure source | exposure assessment | exposure levels |                                                                      |                                                                                                                                                                                                                                                                                             |                                                                      |                                                                                                                                                                     |
|                                                                     |              |                                                                                                                                                                                                                                                  |                                                   |                 |                     |                 | Overall<br>MCI<br>Amnestic MCI<br>Non-amnestic MCI                   | 1.10<br>(0.94, 1.28)<br>1.15<br>(0.94, 1.40)<br>1.06<br>(0.87, 1.30)<br>1.06<br>(0.87, 1.30)                                                                                                                                                                                                | 1.09<br>(0.94, 1.27)<br>1.13<br>(0.93, 1.38)<br>1.06<br>(0.87, 1.30) | with basic information about the chronology between exposition and outcome, but prevalent outcomes and prevalent covariates<br>- No other noise exposure considered |
|                                                                     |              |                                                                                                                                                                                                                                                  |                                                   |                 |                     |                 | Categorical analysis of noise variables (from Table S3)<br>LDEN (dB) | OR (95% CI)                                                                                                                                                                                                                                                                                 |                                                                      |                                                                                                                                                                     |
|                                                                     |              |                                                                                                                                                                                                                                                  |                                                   |                 |                     |                 | <45                                                                  | Reference                                                                                                                                                                                                                                                                                   |                                                                      |                                                                                                                                                                     |
|                                                                     |              |                                                                                                                                                                                                                                                  |                                                   |                 |                     |                 | 45-55                                                                | 0.98 (0.73, 1.32)                                                                                                                                                                                                                                                                           |                                                                      |                                                                                                                                                                     |
|                                                                     |              |                                                                                                                                                                                                                                                  |                                                   |                 |                     |                 | 55-65                                                                | 1.08 (0.78, 1.49)                                                                                                                                                                                                                                                                           |                                                                      |                                                                                                                                                                     |
|                                                                     |              |                                                                                                                                                                                                                                                  |                                                   |                 |                     |                 | 65-75                                                                | 1.21 (0.84, 1.74)                                                                                                                                                                                                                                                                           |                                                                      |                                                                                                                                                                     |
|                                                                     |              |                                                                                                                                                                                                                                                  |                                                   |                 |                     |                 | > 75                                                                 | 1.77 (0.61, 5.07)                                                                                                                                                                                                                                                                           |                                                                      |                                                                                                                                                                     |

| Reference<br>(First author, publication year, S/N)<br>Meta-analysis | Study design | Population                                                                                                                                                                                                                                       | Outcome                                           | Exposure        |                     |                 | Results | Comments<br>(study quality [overall assessment according to SIGN/CASP], conflict of interest [stated vs. not stated], funding [financed from public funds vs. financed from industry], confounding, strengths / weaknesses [potential bias, over- or underestimation of potential effects]) |
|---------------------------------------------------------------------|--------------|--------------------------------------------------------------------------------------------------------------------------------------------------------------------------------------------------------------------------------------------------|---------------------------------------------------|-----------------|---------------------|-----------------|---------|---------------------------------------------------------------------------------------------------------------------------------------------------------------------------------------------------------------------------------------------------------------------------------------------|
|                                                                     |              | Study region<br>Sample population<br>Sample size (M, F, M+F):<br>Age (mean, range)<br>No. of cases / no. of controls or exposed/unexposed<br>Time of recruitment / follow-up (mean, range)<br>Response (%)<br>(baseline minus loss to follow-up) | Disease (ICD-10)<br>Prescription<br>Questionnaire | exposure source | exposure assessment | exposure levels |         |                                                                                                                                                                                                                                                                                             |

|                                        |                                              |  |                                                                                                 |  |                                                                                                        |                                                                                                                               |                                                                                                                                                                                                                                                                      |  |
|----------------------------------------|----------------------------------------------|--|-------------------------------------------------------------------------------------------------|--|--------------------------------------------------------------------------------------------------------|-------------------------------------------------------------------------------------------------------------------------------|----------------------------------------------------------------------------------------------------------------------------------------------------------------------------------------------------------------------------------------------------------------------|--|
| Tzivian, L. 2018, 8533                 | Cross-sectional analysis within cohort study |  | Cognitive function with Global cognitive score (GCS)                                            |  | L <sub>DEN</sub><br>L <sub>DEN_IN</sub> -> corrected for window type, bedroom location and ventilation |                                                                                                                               | Fully adjusted model:<br>GCS: 10 dB noise increase<br>L <sub>DEN</sub> : β=-0.34 (-0.67 - -0.01)<br>L <sub>DEN_IN</sub> : β=-0.18 (-0.25 - -0.10)<br>(Adjusted for CES-D: L <sub>DEN</sub> : β=-0.33 (-0.66 - -0.01); L <sub>DEN_IN</sub> : β=-0.18 (-0.25 - -0.10)) |  |
| Heinz Nixdorf Recall study<br>!UPDATE! |                                              |  | Depressive symptoms with Center for Epidemiologic Studies Depression scale (CES-D); cut-off ≥17 |  |                                                                                                        | Adjustment of noise for CES-D score:<br>L <sub>DEN</sub> : OR=1.22 (0.92; 1.62)<br>L <sub>DEN_IN</sub> : OR=1.04 (0.95; 1.14) |                                                                                                                                                                                                                                                                      |  |

| Reference<br>(First author, publication year, S/N)<br>Meta-analysis | Study design                                       | Population                                                                                                                                                                                                                                                               | Outcome                                                                                                                                                                                    | Exposure        |                                                                                                                                            |                                       | Results                                                                                                                                                                                                                                                                                                                                                    | Comments<br>(study quality [overall assessment according to SIGN/CASP], conflict of interest [stated vs. not stated], funding [financed from public funds vs. financed from industry], confounding, strengths / weaknesses [potential bias, over- or underestimation of potential effects]) |
|---------------------------------------------------------------------|----------------------------------------------------|--------------------------------------------------------------------------------------------------------------------------------------------------------------------------------------------------------------------------------------------------------------------------|--------------------------------------------------------------------------------------------------------------------------------------------------------------------------------------------|-----------------|--------------------------------------------------------------------------------------------------------------------------------------------|---------------------------------------|------------------------------------------------------------------------------------------------------------------------------------------------------------------------------------------------------------------------------------------------------------------------------------------------------------------------------------------------------------|---------------------------------------------------------------------------------------------------------------------------------------------------------------------------------------------------------------------------------------------------------------------------------------------|
|                                                                     |                                                    | Study region<br>Sample population<br>Sample size (M, F, M+F):<br>Age (mean, range)<br>No. of cases / no. of controls or exposed/unexposed<br>Time of recruitment / follow-up (mean, range)<br>Response (%)<br>(baseline minus loss to follow-up)                         | Disease (ICD-10)<br>Prescription<br>Questionnaire                                                                                                                                          | exposure source | exposure assessment                                                                                                                        | exposure levels                       |                                                                                                                                                                                                                                                                                                                                                            |                                                                                                                                                                                                                                                                                             |
| Van Kamp, I. 2007, H-2885, Netherlands<br>Yes                       | Longitudinal / cross-sectional study + panel study | Study region:<br>Amsterdam Schiphol International airport, The Netherlands<br><br>Sample population:<br>Residents living on a radius of 25km around airport plus northern area, sampling not specified.<br><br>Sample size:<br>Baseline 2002:<br>M+F = 5873 participants | Physiological well being<br>Measured by GHQ-12 (Dutch version)<br><br>Intake of prescribed sleeping pills or sedatives in the past 2 weeks<br><br>Intake of anti-depressants in the past 2 | Aircraft        | L <sub>DEN</sub><br>L <sub>N</sub><br><br>6 months average for 2002-2005<br>National Aerospace Laboratory (NLR) for an area of 55 by 71 km | NA<br><br>No starting point specified | Cross-sectional surveys:<br><br>Self-reported mental health complaint and aircraft noise (from Table 2)<br>L <sub>DEN</sub> + L <sub>N</sub> : expressed as OR per 3 dB<br><br>Intake of prescribed sleeping medication or sedatives in the past 2 weeks:<br>2002      2005<br>Exposure<br>L <sub>DEN</sub> 0.91      1.06<br>(0.75-1.09)      (0.89-1.26) | study quality:<br>-<br>(Longitudinal study),<br>Cross-sectional and panel analysis<br><br>conflict of interest:<br>not stated<br><br>funding:<br>not stated<br><br>confounding<br>(adjusted for):<br>gender, age, ethnicity,                                                                |

| Reference<br>(First author, publication year, S/N)<br>Meta-analysis | Study design | Population                                                                                                                                                                                                                                       | Outcome                                           | Exposure        |                     |                     | Results                                                                                                                                                                                                                                                                                                            | Comments<br>(study quality [overall assessment according to SIGN/CASP], conflict of interest [stated vs. not stated], funding [financed from public funds vs. financed from industry], confounding, strengths / weaknesses [potential bias, over- or underestimation of potential effects]) |
|---------------------------------------------------------------------|--------------|--------------------------------------------------------------------------------------------------------------------------------------------------------------------------------------------------------------------------------------------------|---------------------------------------------------|-----------------|---------------------|---------------------|--------------------------------------------------------------------------------------------------------------------------------------------------------------------------------------------------------------------------------------------------------------------------------------------------------------------|---------------------------------------------------------------------------------------------------------------------------------------------------------------------------------------------------------------------------------------------------------------------------------------------|
|                                                                     |              | Study region<br>Sample population<br>Sample size (M, F, M+F):<br>Age (mean, range)<br>No. of cases / no. of controls or exposed/unexposed<br>Time of recruitment / follow-up (mean, range)<br>Response (%)<br>(baseline minus loss to follow-up) | Disease (ICD-10)<br>Prescription<br>Questionnaire | exposure source | exposure assessment | exposure levels     |                                                                                                                                                                                                                                                                                                                    |                                                                                                                                                                                                                                                                                             |
|                                                                     |              | 2005:<br>Survey (from 2002 and new participants 2005)<br>M+F= 6091<br>Longitudinal study:<br>M+F about 2,700<br><br>Additional panel study:<br>M+F = 640 participants<br><br>Age:<br>≥ 18 years<br><br>Exposed/unexposed:<br>Surveys:<br>NA      | weekds                                            | LN              | 0.94<br>(0.82-1.08) | 1.08<br>(0.91-1.27) | Intake of prescribed anti-depressives in the past 2 weeks:<br>Exposure 2002 2005<br>LDEN 1.00 -<br>(0.84-1.20)<br>LN 1.04 -<br>(0.86-1.26)<br>-: no results available, statistical models do not converge<br><br>GHQ 12 (2 or more complaints):<br>Exposure 2002 2005<br>LDEN 1.03 0.94<br>(0.94-1.12) (0.84-1.05) | social economic status, smoking, alcohol, BMI, household size, level of urbanization<br><br>strengths/ weaknesses:<br>+ logistic regression model, stratification + panel study + included<br>non-response<br>- no information on sampling<br>- no information on                           |

| Reference<br>(First author, publication year, S/N)<br>Meta-analysis | Study design | Population                                                                                                                                                                                                                                                                                                                                                        | Outcome                                           | Exposure        |                     |                 | Results                                                                                                                                                                                                                                                                                                                                                                                                                                                                                                             | Comments<br>(study quality [overall assessment according to SIGN/CASP], conflict of interest [stated vs. not stated], funding [financed from public funds vs. financed from industry], confounding, strengths / weaknesses [potential bias, over- or underestimation of potential effects]) |
|---------------------------------------------------------------------|--------------|-------------------------------------------------------------------------------------------------------------------------------------------------------------------------------------------------------------------------------------------------------------------------------------------------------------------------------------------------------------------|---------------------------------------------------|-----------------|---------------------|-----------------|---------------------------------------------------------------------------------------------------------------------------------------------------------------------------------------------------------------------------------------------------------------------------------------------------------------------------------------------------------------------------------------------------------------------------------------------------------------------------------------------------------------------|---------------------------------------------------------------------------------------------------------------------------------------------------------------------------------------------------------------------------------------------------------------------------------------------|
|                                                                     |              | Study region<br>Sample population<br>Sample size (M, F, M+F):<br>Age (mean, range)<br>No. of cases / no. of controls or exposed/unexposed<br>Time of recruitment / follow-up (mean, range)<br>Response (%)<br>(baseline minus loss to follow-up)                                                                                                                  | Disease (ICD-10)<br>Prescription<br>Questionnaire | exposure source | exposure assessment | exposure levels |                                                                                                                                                                                                                                                                                                                                                                                                                                                                                                                     |                                                                                                                                                                                                                                                                                             |
|                                                                     |              | <p>Panel Study:</p> <p>Control group (less than 1.5 dB increase or decrease expected)</p> <p>Exposure group I: increase in <math>L_{DEN} \geq 1.5</math> dB</p> <p>Exposure group II: decrease in <math>L_{DEN} \geq 1.5</math> dB</p> <p>Time of recruitment/ follow-up: Baseline survey: 2002 (baseline) and 2005 (follow-up)</p> <p>Opening of a new fifth</p> |                                                   |                 |                     |                 | <p><math>L_N</math> 1.02 (0.94-1.10) 0.98 (0.89-1.09)</p> <p>Longitudinal study:<br/>Change in prevalence of mental health complaint to the change in noise levels from 2002 till 2005 (N≈2700)<br/>→ change in <math>L_{DEN}</math> and <math>L_N</math> over 3 years did not statistically significant affect the prevalence of any of the mental health complaints<br/>→ all OR were close to 1, varying between 0.95 and 1.03 per 3dB noise level change (OR adjusted for potential confounding and current</p> | <p>the distribution of gender</p> <p>- no information on age</p> <p>- mix of old and new respondents 2005</p> <p>- air particulate level not considered</p> <p>- no information of noise exposure (mean, range)</p> <p>- No other noise exposure considered</p>                             |

| Reference<br>(First author, publication year, S/N)<br>Meta-analysis | Study design | Population                                                                                                                                                                                                                                       | Outcome                                           | Exposure        |                     |                 | Results                                                                                                                                                                                                       | Comments<br>(study quality [overall assessment according to SIGN/CASP], conflict of interest [stated vs. not stated], funding [financed from public funds vs. financed from industry], confounding, strengths / weaknesses [potential bias, over- or underestimation of potential effects]) |
|---------------------------------------------------------------------|--------------|--------------------------------------------------------------------------------------------------------------------------------------------------------------------------------------------------------------------------------------------------|---------------------------------------------------|-----------------|---------------------|-----------------|---------------------------------------------------------------------------------------------------------------------------------------------------------------------------------------------------------------|---------------------------------------------------------------------------------------------------------------------------------------------------------------------------------------------------------------------------------------------------------------------------------------------|
|                                                                     |              | Study region<br>Sample population<br>Sample size (M, F, M+F):<br>Age (mean, range)<br>No. of cases / no. of controls or exposed/unexposed<br>Time of recruitment / follow-up (mean, range)<br>Response (%)<br>(baseline minus loss to follow-up) | Disease (ICD-10)<br>Prescription<br>Questionnaire | exposure source | exposure assessment | exposure levels |                                                                                                                                                                                                               |                                                                                                                                                                                                                                                                                             |
|                                                                     |              | runway: 2003                                                                                                                                                                                                                                     |                                                   |                 |                     |                 | noise levels)                                                                                                                                                                                                 |                                                                                                                                                                                                                                                                                             |
|                                                                     |              | Panel study:<br>2002-2005 (yearly basis)                                                                                                                                                                                                         |                                                   |                 |                     |                 | Panel Study:<br>- no relationship between noise and GHQ 12 scores<br>- intake of prescribed sleeping medications/ sedatives and anti-depressives had too little variations in time for a statistical analysis |                                                                                                                                                                                                                                                                                             |
|                                                                     |              | Response rate:<br>Baseline survey:<br>2002: 46 %<br>Follow-up:<br>2005:<br>2671/4435=73% (of the re-invited) +<br>3420/8400=43 % (new subjects)<br>Total N 2005=6091<br>Panel study:<br>64 %                                                     |                                                   |                 |                     |                 |                                                                                                                                                                                                               |                                                                                                                                                                                                                                                                                             |



| Reference<br>(First author, publication year, S/N)<br>Meta-analysis | Study design                                                                    | Population                                                                                                                                                                                                                                                                                                                                | Outcome                                                                                                                                                                                                     | Exposure                            |                                                                                                                                                                          |                 | Results                                                                                                                                                                                                                                                                                                | Comments<br>(study quality [overall assessment according to SIGN/CASP], conflict of interest [stated vs. not stated], funding [financed from public funds vs. financed from industry], confounding, strengths / weaknesses [potential bias, over- or underestimation of potential effects]) |
|---------------------------------------------------------------------|---------------------------------------------------------------------------------|-------------------------------------------------------------------------------------------------------------------------------------------------------------------------------------------------------------------------------------------------------------------------------------------------------------------------------------------|-------------------------------------------------------------------------------------------------------------------------------------------------------------------------------------------------------------|-------------------------------------|--------------------------------------------------------------------------------------------------------------------------------------------------------------------------|-----------------|--------------------------------------------------------------------------------------------------------------------------------------------------------------------------------------------------------------------------------------------------------------------------------------------------------|---------------------------------------------------------------------------------------------------------------------------------------------------------------------------------------------------------------------------------------------------------------------------------------------|
|                                                                     |                                                                                 | Study region<br>Sample population<br>Sample size (M, F, M+F):<br>Age (mean, range)<br>No. of cases / no. of controls or exposed/unexposed<br>Time of recruitment / follow-up (mean, range)<br>Response (%)<br>(baseline minus loss to follow-up)                                                                                          | Disease (ICD-10)<br>Prescription<br>Questionnaire                                                                                                                                                           | exposure source                     | exposure assessment                                                                                                                                                      | exposure levels |                                                                                                                                                                                                                                                                                                        |                                                                                                                                                                                                                                                                                             |
| Zock, 2018, 8499                                                    | Cross-sectional, (using prospective panel data on neighborhood social cohesion) | Study region:<br>Netherlands (neighborhoods with the same five-digit postal code)<br><br>Sample size:<br>M+F=4,450<br>M= 2,184, F=2,266<br><br>Sample population:<br>Sample based on NIVEL primary care database (10% of GPs are registered). Included were all individuals who had been living in the area during all 12 months in 2013. | Disease in 2013 defined according to the ICPC code (International Classification of Primary Care)<br><br>Depression<br>P03 = Feeling depressed<br>P76 = Depressive disorder<br><br>Anxiety<br>P01 = Feeling | Road<br>2008<br><br>Railway<br>2007 | Modelled -> Standard Model<br><br>Instrumentation for Noise Assessments (STAMINA)<br><br>10x10m spatial resolution (residence matched to nearest grid point)<br><br>LDEN | -               | Prevalence<br>Depression: n = 202 (4.5%)<br>Anxiety: n = 178 (4.0%)<br><br>Road: Per 10 dB<br>Depression:<br>OR = 1.17, 95% CI 0.72-1.91<br>Anxiety:<br>OR = 0.94, 95% CI 0.59-1.52<br><br>Railway: Per 10 dB<br>Depression:<br>OR = 0.94, 95% CI 0.76-1.18<br>Anxiety:<br>OR = 1.06, 95% CI 0.87-1.29 | study quality:<br>+ (to -)<br>Cross-sectional analysis<br>conflict of interest:<br>stated<br>funding:<br>stated<br>confounding<br>(controlled for): sex, age, household income and socio-economic status.<br>strengths,<br>weaknesses:<br>-Cross-sectional                                  |

| Reference<br>(First author, publication year, S/N)<br>Meta-analysis | Study design | Population                                                                                                                                                                                                                                       | Outcome                                                                                                                                                                                                                                                                          | Exposure        |                     |                 | Results                                                                                                                                                                                                                                                                                                                       | Comments<br>(study quality [overall assessment according to SIGN/CASP], conflict of interest [stated vs. not stated], funding [financed from public funds vs. financed from industry], confounding, strengths / weaknesses [potential bias, over- or underestimation of potential effects]) |
|---------------------------------------------------------------------|--------------|--------------------------------------------------------------------------------------------------------------------------------------------------------------------------------------------------------------------------------------------------|----------------------------------------------------------------------------------------------------------------------------------------------------------------------------------------------------------------------------------------------------------------------------------|-----------------|---------------------|-----------------|-------------------------------------------------------------------------------------------------------------------------------------------------------------------------------------------------------------------------------------------------------------------------------------------------------------------------------|---------------------------------------------------------------------------------------------------------------------------------------------------------------------------------------------------------------------------------------------------------------------------------------------|
|                                                                     |              | Study region<br>Sample population<br>Sample size (M, F, M+F):<br>Age (mean, range)<br>No. of cases / no. of controls or exposed/unexposed<br>Time of recruitment / follow-up (mean, range)<br>Response (%)<br>(baseline minus loss to follow-up) | Disease (ICD-10)<br>Prescription<br>Questionnaire                                                                                                                                                                                                                                | exposure source | exposure assessment | exposure levels |                                                                                                                                                                                                                                                                                                                               |                                                                                                                                                                                                                                                                                             |
|                                                                     |              | Age: mean 40.5 years<br>0-4 years = 233<br>5-12 years = 461<br>13-18 years = 328<br>19-39 years = 1032<br>40-64 years = 1663<br>65 years and older = 733<br><br>No. of cases<br>See results<br><br>Time of recruitment<br>2013<br><br>Response:  | anxious/ nervous/<br>tense<br>P74 = Anxiety<br>disorder/ anxiety<br>state<br><br><i>Chronic disease in<br/>                     2011 and 2012<br/>                     "taken into account<br/>                     to minimize<br/>                     misclassification".</i> |                 |                     |                 | analysis with<br>longitudinal data on<br>neighborhood social<br>cohesion, and<br>retrospective data on<br>noise exposure<br>providing basic<br>information about<br>chronology between<br>exposition and<br>outcome<br>-air pollution, green<br>spaces and urbanity<br>were estimated but<br>not adjusted for in the<br>model |                                                                                                                                                                                                                                                                                             |

| Reference<br>(First author, publication year, S/N)<br>Meta-analysis | Population   |                                                                                                                                                                                                                                                  | Outcome                                           | Exposure        |                     |                 | Results | Comments<br>(study quality [overall assessment according to SIGN/CASP], conflict of interest [stated vs. not stated], funding [financed from public funds vs. financed from industry], confounding, strengths / weaknesses [potential bias, over- or underestimation of potential effects]) |
|---------------------------------------------------------------------|--------------|--------------------------------------------------------------------------------------------------------------------------------------------------------------------------------------------------------------------------------------------------|---------------------------------------------------|-----------------|---------------------|-----------------|---------|---------------------------------------------------------------------------------------------------------------------------------------------------------------------------------------------------------------------------------------------------------------------------------------------|
|                                                                     | Study design | Study region<br>Sample population<br>Sample size (M, F, M+F):<br>Age (mean, range)<br>No. of cases / no. of controls or exposed/unexposed<br>Time of recruitment / follow-up (mean, range)<br>Response (%)<br>(baseline minus loss to follow-up) | Disease (ICD-10)<br>Prescription<br>Questionnaire | exposure source | exposure assessment | exposure levels |         |                                                                                                                                                                                                                                                                                             |
|                                                                     |              | Secondary data                                                                                                                                                                                                                                   |                                                   |                 |                     |                 |         | + adequate definition and assessment of outcome<br>+adequate control for confounders<br>+ adequate exposure assessment<br>+ routine data, should lead to reduced selection bias                                                                                                             |



## 2. Studies excluded with reasons

**Table 2.** Studies excluded with reasons.

| <b>Outcome not (clinical) mental disorder (n = 101)</b>                                                                                                                                                                                                                                                                                                            |
|--------------------------------------------------------------------------------------------------------------------------------------------------------------------------------------------------------------------------------------------------------------------------------------------------------------------------------------------------------------------|
| 1. Al-Mutairi, N. Z., Al-Attar, M. A., & Al-Rukaibi, F. S. (2011). Traffic-generated noise pollution: exposure of road users and populations in Metropolitan Kuwait. <i>Environmental Monitoring &amp; Assessment</i> , 183(1-4), 65-75. doi: 10.1007/s10661-011-1906-0                                                                                            |
| 2. Arbeitsgemeinschaft für sozio-psychologische Fluglärmuntersuchungen (1973): Untersuchungen über den Fluglärm und seine Wirkungen im Gebiet von drei Schweizer Zivillflughäfen 1971/72. Eidgenössisches Luftamt, Bundeshaus, Bern, Schweiz.                                                                                                                      |
| 3. Babisch, W., Schulz, C., Seiwert, M., & Conrad, A. (2012). Noise annoyance as reported by 8-to 14-year-old children. <i>Environment &amp; Behavior</i> , 44(1), 68-86. doi: <a href="https://doi.org/10.1177/0013916510387400">10.1177/0013916510387400</a>                                                                                                     |
| 4. Barceló, M. A., Varga, D., Tobias, A., Diaz, J., Linares, C., & Saez, M. (2016). Long term effects of traffic noise on mortality in the city of Barcelona, 2004–2007. <i>Environmental Research</i> , 147, 193-206. doi: 10.1016/j.envres.2016.02.010                                                                                                           |
| 5. Basner, M., & Samel, A. (2004). Nocturnal aircraft noise effects. <i>Noise and Health</i> , 6(22), 83.                                                                                                                                                                                                                                                          |
| 6. Bättig, K. & Buzzi, R. (1979). Psychophysiological effects of aircraft noise. <i>Activitas Nervosa Superior</i> , 21(4), 257-258.                                                                                                                                                                                                                               |
| 7. Bättig, K., Zeier, H., Müller, R., & Buzzi, R. (1980). A field study on vegetative effects of aircraft noise. <i>Archives of Environmental Health: An International Journal</i> , 35(4), 228-235.                                                                                                                                                               |
| 8. Bättig, K., & Buzzi, R. (1981). Psychophysiological Effekte von Lärm und Beschäftigung in der Heimsituation. <i>Zeitschrift für Experimentelle und Angewandte Psychologie</i> , 28, 1-14.                                                                                                                                                                       |
| 9. Bättig, K., & Buzzi, R. (1981). Psychophysiological effects of noise and activity in the home situation. <i>Zeitschrift für Experimentelle und Angewandte Psychologie</i> , 28, 1-14.                                                                                                                                                                           |
| 10. Bättig, K., & Buzzi, R. (1982). Physiological responses to noise and to the type of activity under field conditions. <i>Activitas Nervosa Superior</i> , (Pt 1), 236-240.                                                                                                                                                                                      |
| 11. Baumbach, W., Mörstedt, R., Schulze, B., Wölke, G., Ullmann, R., & Grossmann, G. (1990). New aspects of the traffic noise problem in the inner city area. <i>Zeitschrift für die gesamte Hygiene und ihre Grenzgebiete</i> , 36(4), 204-206.                                                                                                                   |
| 12. Beutel, M. E., Jünger, C., Klein, E. M., Wild, P., Lackner, K., Blettner, M., ... & Münzel, T. (2016). Noise annoyance is associated with depression and anxiety in the general population—the contribution of aircraft noise. <i>Plos one</i> , 11(5), e0155357. doi: <a href="https://doi.org/10.1371/journal.pone.0155357">10.1371/journal.pone.0155357</a> |
| 13. Birnie, S. E., Hall, F. L., & Taylor, S. M. (1980). Community response to noise from a general aviation airport. <i>Noise Control Eng.:(United States)</i> , 15.                                                                                                                                                                                               |
| 14. Björk, J., Ardö, J., Stroh, E., Lövkvist, H., Östergren, P. O., & Albin, M. (2006). Road traffic noise in southern Sweden and its relation to annoyance, disturbance of daily activities and health. <i>Scandinavian Journal of Work, Environment &amp; Health</i> , 32(5), 392-401. doi:10.5271/sjweh.1035                                                    |
| 15. Björk, J., Ardö, J., Stroh, E., Lövkvist, H., Östergren, P. O., & Albin, M. (2007). Erratum: Road traffic noise in southern Sweden and its relation to annoyance, disturbance of daily activities and health. <i>Scandinavian Journal of Work, Environment &amp; Health</i> , 33(1), 392-401.                                                                  |
| 16. Black, D. A., Black, J. A., Issarayangyun, T., & Samuels, S. E. (2007). Aircraft noise exposure and resident's stress and hypertension: A public health perspective for airport environmental management. <i>Journal of Air Transport Management</i> , 13(5), 264-276. doi:                                                                                    |

- 10.1016/j.jairtraman.2007.04.003
17. Bodenheim, A. & Unger, M (1991). Psychosoziale Auswirkungen des Wohnens an hochfrequentierten Straßen : Eine Erkundungsstudie. *Unser Doppelleben. Neue Studien zur Umweltbetroffenheit*, 103-139.
  18. Botteldooren, D., Dekoninck, L., & Gillis, D. (2011). The influence of traffic noise on appreciation of the living quality of a neighborhood. *International Journal of Environmental Research and Public Health*, 8(3), 777-798. doi: [10.3390/ijerph8030777](https://doi.org/10.3390/ijerph8030777)
  19. Brink, M. (2011). Parameters of well-being and subjective health and their relationship with residential traffic noise exposure—A representative evaluation in Switzerland. *Environment International*, 37(4), 723-733. doi: 10.1016/j.envint.2011.02.011.
  20. Brown, A. L. (1984). Critique of subjective responses of Chinese to aircraft noise. *Applied Acoustics*, 17(3), 223-232.
  21. Bullinger, M., & Bahner, U. (1997). Erlebte Umwelt und subjektive Gesundheit. Eine Untersuchung an Müttern und Kindern aus unterschiedlichen lärmbelasteten Gebieten. *Zeitschrift für Gesundheitswissenschaften*, 3, 89-108.
  22. Bullinger, M., Hygge, S., Evans, G. W., Meis, M., & Mackensen, S. V. (1999). The psychological cost of aircraft noise for children. *Zentralblatt für Hygiene und Umweltmedizin*, 202(2-4), 127-138. doi: [10.1080/00207594.2013.804190](https://doi.org/10.1080/00207594.2013.804190)
  23. Bullinger, M. (2000). Wahrgenommene Umweltbelastung und gesundheitsbezogene Lebensqualität von Müttern und Kindern : Eine umweltepidemiologische Untersuchung an Familien aus unterschiedlich fluglärmbelasteten Gebieten in Bayern. *Lebensqualitätsforschung aus medizinpsychologischer und -soziologischer Perspektive*, 354-367.
  24. Buzzi, R., & Bättig, K. (1984). Extraaurale beziehungsweise vegetative Effekte von Umweltlärm. *Beiträge zur Bedeutungslehre des Schalls*. Peter Lang Verlag, Bern, 243-251.
  25. Carter, N. L. (1996). Transportation noise, sleep, and possible after-effects. *Environment International*, 22(1), 105-116. doi: [10.1016/0160-4120\(95\)00108-5](https://doi.org/10.1016/0160-4120(95)00108-5)
  26. Clark, C. & Sörqvist, P. (2012). The influence of noise on performance and behavior. *Noise Health*, 14, 292-296.
  27. Conzelmann-Auer, C., Braun-Fahrlander, C., Ackermann-Liebrich, U., & Wanner, H. U. (1993). Perception of traffic noise emission in Basel city canton in comparison to actually measured noise levels. *Sozial-und Präventivmedizin*, 38(4), 231-238. doi: [10.1007/BF01624541](https://doi.org/10.1007/BF01624541)
  28. De Jong, R. G. (1979). A Dutch study on railroad traffic noise. *Journal of Sound and Vibration*, 66(3), 497-502. doi: [10.1016/0022-460X\(79\)90871-X](https://doi.org/10.1016/0022-460X(79)90871-X)
  29. De Jong, R. G. (1981). Dutch study of noise disturbance due to airplanes. *Geluid Omgeving*, 4(4), 228-232.
  30. De Kluzenaar, Y. , Salomons, E. M., Janssen, S. A., van Lenthe, F. J., Vos, H., Zhou, H., ... & Mackenbach, J. P. (2011). Urban road traffic noise and annoyance: The effect of a quiet façade. *The Journal of the Acoustical Society of America*, 130(4), 1936-1942. doi: 10.1121/1.3621180.
  31. de Paiva Vianna, K. M., Cardoso, M. R. A., & Rodrigues, R. M. C. (2015). Noise pollution and annoyance: An urban soundscapes study. *Noise & Health*, 17(76), 125. doi: 10.4103/1463-1741.155833
  32. Delauzun, F. R., & Griffiths, I. D. (1978). The problem of individual differences in sensitivity to traffic noise and the establishment of standards. *International Review of Applied Psychology*. doi:

[10.1111/j.1464-0597.1978.tb00354.x](https://doi.org/10.1111/j.1464-0597.1978.tb00354.x)

33. Dratva, J., Zemp, E., Dietrich, D. F., Bridevaux, P. O., Rochat, T., Schindler, C., & Gerbase, M. W. (2010). Impact of road traffic noise annoyance on health-related quality of life: Results from a population-based study. *Quality of Life Research*, 19(1), 37-46. doi: 10.1007/s11136-009-9571-2
34. Evans, G. W., Hygge, S., & Bullinger, M. (1995). Chronic noise and psychological stress. *Psychological Science*, 6(6), 333-338. doi: [10.1111/j.1467-9280.1995.tb00522.x](https://doi.org/10.1111/j.1467-9280.1995.tb00522.x)
35. Evans, G. W., Bullinger, M., & Hygge, S. (1998). Chronic noise exposure and physiological response: A prospective study of children living under environmental stress. *Psychological Science*, 9(1), 75-77. doi: [10.1111/1467-9280.00014](https://doi.org/10.1111/1467-9280.00014)
36. Fiedler, F. E., & Fiedler, J. (1975). Port noise complaints: Verbal and behavioral reactions to airport-related noise. *Journal of Applied Psychology*, 60(4), 498. Doi: [10.1037/h0076924](https://doi.org/10.1037/h0076924)
37. Findeis, H., & Peters, E. (2004). Disturbing effects of low frequency sound immissions and vibrations in residential buildings. *Noise and Health*, 6(23), 29.
38. Fooladi, M. M. (2012). Involuntary and persistent environmental noise influences health and hearing in Beirut, Lebanon. *Journal of Environmental and Public Health*, 2012: 235618. doi: 10.1155/2012/235618
39. Franssen, E. A. M., Van Wiechen, C. M. A. G., Nagelkerke, N. J. D., & Lebet, E. (2004). Aircraft noise around a large international airport and its impact on general health and medication use. *Occupational and Environmental Medicine*, 61(5), 405-413. doi: [10.1136/oem.2002.005488](https://doi.org/10.1136/oem.2002.005488)
40. Furlan, P. M., Bergamini, L. & Bergamasco, B. (1976). Street noise. A psychologic and neurophysiologic study. *Rassegna Di Studi Psichiatrici*, 65: 519-530.
41. Gómez-Jacinto, L., & Moral-Toranzo, F. (1999). Urban traffic noise and self-reported health. *Psychological Reports*, 84(3\_suppl), 1105-1108. doi:[10.2466/pr0.1999.84.3c.1105](https://doi.org/10.2466/pr0.1999.84.3c.1105)
42. Goswami, S., Nayak, S. K., Pradhan, A. C., & Dey, S. K. (2011). A study on traffic noise of two campuses of University, Balasore, India. *Journal of Environmental Biology*, 32(1), 105-109.
43. Gozalo, G. R., & Barrigón Morillas, J. M. (2016). Analysis of sampling methodologies for noise pollution assessment and the impact on the population. *International Journal of Environmental Research and Public Health*, 13(5), 490. doi: 10.3390/ijerph13050490
44. Graeven, D. B. (1974). The effects of airplane noise on health: An examination of three hypotheses. *Journal of Health and Social Behavior*, 15(4), 336-343. doi: [10.2307/2137094](https://doi.org/10.2307/2137094)
45. Greiser, E. (2014). Health risk railroad noise-prognosis of potential health risks subsequent to night-time exposure to railroad noise in the German part of the Transversal Rotterdam Genova. *Gesundheitswesen (Bundesverband der Ärzte des Öffentlichen Gesundheitsdienstes (Germany))*, 76(12), 862-864. doi: [10.1055/s-0034-1395639](https://doi.org/10.1055/s-0034-1395639)
46. Gundersen, H., Magerøy, N., Moen, B. E., & Bråtveit, M. (2013). Traffic density in area of residence is associated with health-related quality of life in women, the community-based Hordaland Health Study. *Archives of Environmental & Occupational Health*, 68(3), 153-160. doi: [10.1080/19338244.2012.676103](https://doi.org/10.1080/19338244.2012.676103)
47. Haines, M. M., Brentnall, S. L., Stansfeld, S. A., & Klineberg, E. (2003). Qualitative responses of children to environmental noise. *Noise and Health*, 5(19), 19.
48. Hammad, R. N. S., & Abdelazeez, M. K. (1987). Measurements and analysis of the traffic noise in Amman, Jordan and its effects. *Applied Acoustics*, 21(4), 309-320. doi: [10.1016/0003-682X\(87\)90052-1](https://doi.org/10.1016/0003-682X(87)90052-1)

49. Hammersen, F., Niemann, H., & Hoebel, J. (2016). Environmental noise annoyance and mental health in adults: findings from the cross-sectional German Health Update (GEDA) Study 2012. *International Journal of Environmental Research and Public Health*, 13(10), 954. doi:[10.3390/ijerph13100954](https://doi.org/10.3390/ijerph13100954)
50. Han, Z. X., Lei, Z. H., Zhang, C. L., Xiong, W., Gan, Z. L., Hu, P., & Zhang, Q. B. (2015). Noise monitoring and adverse health effects in residents in different functional areas of Luzhou, China. *Asia Pacific Journal of Public Health*, 27(2\_suppl), 93S-99S. doi: [10.1177/1010539514560056](https://doi.org/10.1177/1010539514560056)
51. Hawkins, M. M., & Large, J. B. (1983). Subjective response to noise in rural villages, particularly from road traffic. *Journal of Sound and Vibration*, 88(3), 321-331. doi: [10.1016/0022-460X\(83\)90691-0](https://doi.org/10.1016/0022-460X(83)90691-0)
52. Hérítier, H., Vienneau, D., Frei, P., Eze, I. C., Brink, M., Probst-Hensch, N., & Röösli, M. (2014). The association between road traffic noise exposure, annoyance and health-related quality of life (HRQOL). *International Journal of Environmental Research and Public Health*, 11(12), 12652-12667. doi: [10.3390/ijerph111212652](https://doi.org/10.3390/ijerph111212652)
53. Honold, J. & van der Meer, E. (2017). Residential exposure to multiple environmental burdens and health: A mixed-methods study. *Umweltpsychologie* 21(1), 119-138.
54. Jarup, L., Dudley, M. L., Babisch, W., Houthuijs, D., Swart, W., Pershagen, G., ... & Vigna-Taglianti, F. (2005). Hypertension and exposure to noise near airports (HYENA): study design and noise exposure assessment. *Environmental Health Perspectives*, 113(11), 1473. doi:[10.1289/ehp.8037](https://doi.org/10.1289/ehp.8037)
55. Jenkins, M. A., & Pahl, J. (1975). Measurement of freeway noise and community response. *The Journal of the Acoustical Society of America*, 58(6), 1222-1231. doi: [10.1121/1.380804](https://doi.org/10.1121/1.380804)
56. Karsdorf, G., & Klappach, H. (1968). Einflüsse des Verkehrslärms auf Gesundheit und Leistung bei Oberschülern einer Großstadt. *Zeitschrift für die Gesamte Hygiene und ihre Grenzgebiete*, 14, 52-54.
57. Kastka, J. (1984). Untersuchungen zur Belästigung durch Verkehrslärm: umweltpsychologische Analysen zu einem umwelthygienischen Konzept. Dissertation Universität Düsseldorf.
58. Klatte, M., Spilski, J., Mayerl, J., Möhler, U., Lachmann, T., & Bergström, K. (2017). Effects of aircraft noise on reading and quality of life in primary school children in Germany: Results from the NORAH study. *Environment and Behavior*, 49(4), 390-424. doi: [10.1177/0013916516642580](https://doi.org/10.1177/0013916516642580)
59. Knipschild, P. (1977). V. Medical effects of aircraft noise: community cardiovascular survey. *International Archives of Occupational and Environmental Health*, 40(3), 185-190. doi : [10.1007/BF01842081](https://doi.org/10.1007/BF01842081)
60. Ko, J. H., Chang, S. I., Kim, M., Holt, J. B., & Seong, J. C. (2011). Transportation noise and exposed population of an urban area in the Republic of Korea. *Environment International*, 37(2), 328-334. doi: [10.1016/j.envint.2010.10.001](https://doi.org/10.1016/j.envint.2010.10.001)
61. Koszarny, Z. (2001). The estimate of well-being and self-assessed health status in urban population in various acoustic areas. *Roczniki Panstwowego Zakladu Higieny*, 52(2), 165-178.
62. Koszarny, Z., Szata, W., & Goryński, P. (1979). Exposure to railway noise and its effect on the population. *Roczniki Panstwowego Zakladu Higieny*, 30(4), 387-395.
63. Kryter, K. D. (2009). Acoustical model and theory for predicting effects of environmental noise



- on people. *The Journal of the Acoustical Society of America*, 125(6), 3707-3721. doi: [10.1121/1.3125320](https://doi.org/10.1121/1.3125320)
64. Krert, E. (1986). Entstehung und Bewältigung von Lärmbelastungen - insbesondere Fluglärmbelastungen - bei Kindern. Dissertation Universität Graz.
65. La Torre, G., Moscato, U., La Torre, F., Ballini, P., Marchi, S., & Ricciardi, W. (2007). Environmental noise exposure and population health: a cross-sectional study in the Province of Rome. *Journal of Public Health*, 15(5), 339-344. doi: 10.1007/s10389-007-0144-y
66. Lercher, P., & Kofler, W. W. (1996). Behavioral and health responses associated with road traffic noise exposure along alpine through-traffic routes. *Science of the Total Environment*, 189-190, 85-89 doi: [10.1016/0048-9697\(96\)05194-7](https://doi.org/10.1016/0048-9697(96)05194-7)
67. Lercher, P., Evans, G. W., Meis, M., & Kofler, W. W. (2002). Ambient neighbourhood noise and children's mental health. *Occupational and environmental medicine*, 59(6), 380-386. doi: 10.1136/oem.59.6.380
68. Lefèvre, M., Carlier, M. C., Champelovier, P., Lambert, J., Laumon, B., & Evrard, A. S. (2017). Effects of aircraft noise exposure on saliva cortisol near airports in France. *Occupational Environmental Medicine*, oemed-2016. doi: 10.1136/oemed-2016-104208
69. Maschke, C. (2003). Epidemiological research on stress caused by traffic noise and its effects on high blood pressure and psychic disturbances. In *Proceedings of the 8th International Congress on Noise as a Public Health Problem (Jong RD, Houtgast T, Franssen EAM, Hofman W, eds)*. Shiedam, the Netherlands: Foundation ICBEN (pp. 96-101).
70. Matheson, M. P., Stansfeld, S. A., & Haines, M. M. (2003). The effects of chronic aircraft noise exposure on children's cognition and health: 3 field studies. *Noise and Health*, 5(19), 31.
71. Meister, E. A., & Donatelle, R. J. (2000). The impact of commercial-aircraft noise on human health: a neighborhood study in metropolitan Minnesota. *Journal of Environmental Health*, 63(4), 9.
72. Mosskov, J. I., & Ettema, J. H. (1977). IV. Extra-auditory effects in long-term exposure to aircraft and traffic noise. *International Archives of Occupational and Environmental Health*, 40(3), 177-184. doi: 10.1007/BF01842080
73. Müller, R. (1980). Does aircraft noise affect health? *Sozial-und Präventivmedizin*, 25(3), 103-109. doi: 1007/BF02074972
74. Noack, R. H. (1995). *Lärm und Ruhe: Untersuchungen zur Belästigung durch Verkehrsgeräusche und Pegelschwankungen*. dis's kurs.
75. Pedersen, E. (2015). City dweller responses to multiple stressors intruding into their homes: Noise, light, odour, and vibration. *International Journal of Environmental Research and Public Health*, 12(3), 3246-3263. doi: [10.3390/ijerph120303246](https://doi.org/10.3390/ijerph120303246)
76. Pulles, M. P. J., Biesiot, W., & Stewart, R. (1990). Adverse effects of environmental noise on health: an interdisciplinary approach. *Environment International*, 16(4-6), 437-445. doi: [10.1016/0160-4120\(90\)90012-U](https://doi.org/10.1016/0160-4120(90)90012-U)
77. Relster, E. (1977). Influence of traffic noise on mental health. *Ugeskr Laeger*, 139 (9):549-552.
78. Rilfatti, M. (1982). Human reactions to community noise. I. Noise of urban street traffic in the city of Verona. *Nuovi Annali d'Igiene e Microbiologia*, 33(4-6), 799-815.
79. Röösl, M., Vienneau, D., & Perez, L. (2015). Transportation noise: 'neglected exposure' on a global scale. *Tropical Medicine & International Health*, 20, 4.

80. Schreckenberg, D., & Meis, M. (2006). Effects of aircraft noise on noise annoyance and quality of life around Frankfurt Airport. Final abridged report
81. Schreckenberg, D., Griefahn, B., & Meis, M. (2010). The associations between noise sensitivity, reported physical and mental health, perceived environmental quality, and noise annoyance. *Noise and Health*, 12(46), 7. doi: 10.4103/1463-1741.59995.
82. Schreckenberg, D., Meis, M., Kahl, C., Peschel, C., & Eikmann, T. (2010). Aircraft noise and quality of life around Frankfurt Airport. *International Journal of Environmental Research and Public Health*, 7(9), 3382-3405. doi: [10.3390/ijerph7093382](https://doi.org/10.3390/ijerph7093382)
83. Seabi, J. (2013). An epidemiological prospective study of children's health and annoyance reactions to aircraft noise exposure in South Africa. *International Journal of Environmental Research and Public Health*, 10(7), 2760-2777. doi: 10.3390/ijerph10072760
84. Seidman, M. D., & Standing, R. T. (2010). Noise and quality of life. *International Journal of Environmental Research and Public Health*, 7(10), 3730-3738. doi: 10.3390/ijerph7103730
85. Shepherd, D., Dirks, K., Welch, D., McBride, D., & Landon, J. (2016). The covariance between air pollution annoyance and noise annoyance, and its relationship with health-related quality of life. *International Journal of Environmental Research and Public Health*, 13(8), 792. doi: [10.3390/ijerph13080792](https://doi.org/10.3390/ijerph13080792)
86. Stansfeld, S., Hygge, S., Clark, C., & Alfred, T. (2010). Night time aircraft noise exposure and children's cognitive performance. *Noise and Health*, 12(49), 255. doi: 10.4103/1463-1741.70504.
87. Stansfeld, S. A., & Shipley, M. (2015). Noise sensitivity and future risk of illness and mortality. *Science of the Total Environment*, 520, 114-119. doi: 10.1016/j.scitotenv.2015.03.053.
88. Tzivian, L., Foraster, M., Hennig, F., Fuks, K., Sugiri, D., Erbel, R., Jockel, H. K., Moebus, S. & Hoffmann, B. (2016). Long-term traffic noise exposure corrected for indoors and its association with outdoor air pollution and annoyance in participants of the Heinz Nixdorf recall study. *European Journal of Epidemiology*, 31, S214-S215. doi: 10.1289/ehp.1509824
89. Urban, J., & Máca, V. (2013). Linking traffic noise, noise annoyance and life satisfaction: A case study. *International Journal of Environmental Research and Public Health*, 10(5), 1895-1915. doi: [10.3390/ijerph10051895](https://doi.org/10.3390/ijerph10051895)
90. van den Berg, F., Verhagen, C., & Uitenbroek, D. (2015). The relation between self-reported worry and annoyance from air and road traffic. *International Journal of Environmental Research and Public Health*, 12(3), 2486-2500. doi: [10.3390/ijerph120302486](https://doi.org/10.3390/ijerph120302486)
91. van Kempen, E., van Kamp, I., Nilsson, M., Lammers, J., Emmen, H., Clark, C., & Stansfeld, S. (2010). The role of annoyance in the relation between transportation noise and children's health and cognition. *The Journal of the Acoustical Society of America*, 128(5), 2817-2828. doi: [10.1121/1.3483737](https://doi.org/10.1121/1.3483737)
92. Van Wiechen, C. M., Franssen, E. A., de Jong, R. G., & Lebet, E. (2002). Aircraft noise exposure from Schiphol airport: a relation with complainants. *Noise and Health*, 5(17), 23.
93. Wang, R., Helbich, M., Yao, Y., Zhang, J., Liu, P., Yuan, Y., & Liu, Y. (2019). Urban greenery and mental wellbeing in adults: Cross-sectional mediation analyses on multiple pathways across different greenery measures. *Environmental research*, 176, 108535. [10.1016/j.envres.2019.108535](https://doi.org/10.1016/j.envres.2019.108535)
94. Ward, L. M., & Suedfeld, P. (1973). Human responses to highway noise. *Environmental Research*, 6(3), 306-326. doi: [10.1016/0013-9351\(73\)90043-1](https://doi.org/10.1016/0013-9351(73)90043-1)

95. Waters, D. M. (1979). Overall railway noise impact in the UK. *Journal of Sound and Vibration*, 66(3), 477-481 [doi: 10.1016/0022-460X\(79\)90868-X](https://doi.org/10.1016/0022-460X(79)90868-X)
96. Welch, D., Shepherd, D., Dirks, K. N., McBride, D., & Marsh, S. (2013). Road traffic noise and health-related quality of life: A cross-sectional study. *Noise and Health*, 15(65), 224. doi: 10.4103/1463-1741.113513.
97. Wothge, J., Belke, C., Möhler, U., Guski, R., & Schreckenberger, D. (2017). The Combined Effects of Aircraft and Road Traffic Noise and Aircraft and Railway Noise on Noise Annoyance – An Analysis in the Context of the Joint Research Initiative NORAH. *International Journal of Environmental Research and Public Health*, 14(8), 871. doi: 10.3390/ijerph14080871.
98. Wu, J., Zou, C., He, S., Sun, X., Wang, X., & Yan, Q. (2019). Traffic noise exposure of high-rise residential buildings in urban area. *Environmental Science and Pollution Research*, 26(9), 8502-8515. doi: 10.1007/s11356-019-04640-1
99. Yokoo, Y., & Mitani, Y. (1982). The effects of chronic exposure to train noise on the mental efficiency of elementary school children (report 2). *Nippon Eiseigaku Zasshi (Japanese Journal of Hygiene)*, 37(5), 753-761. [doi: 10.1265/jjh.37.753](https://doi.org/10.1265/jjh.37.753)
100. Yoshida, T., & Nakamura, S. (1988). Subjective ratings of health status and railway noise. *Journal of Sound and Vibration*, 127(3), 593-598. [doi: 10.1016/0022-460X\(88\)90388-4](https://doi.org/10.1016/0022-460X(88)90388-4)
101. Zijlema, W. L., Morley, D. W., Stolk, R. P., & Rosmalen, J. G. M. (2015). Noise and somatic symptoms: A role for personality traits?. *International Journal of Hygiene and Environmental Health*, 218(6), 543-549. [doi: 10.1016/j.ijheh.2015.05.001](https://doi.org/10.1016/j.ijheh.2015.05.001)

---

#### Reviews/ Letters/ Editorials (n = 51)

---

1. Adams, L. (2017). Dementia: Could heavy traffic drive dementia risk?. *Nature Reviews Neurology*, 13(3), 128. doi: [10.1038/nrneurol.2017.6](https://doi.org/10.1038/nrneurol.2017.6)
2. Anonymous (1979). Minds under the flightpath. *Lancet*, 2(8156-8157), 1343.
3. Anonymous (1992). Health effects of the noise of low-flying aircrafts. [German]. *Zeitschrift für Lärmbekämpfung*, 39(2), 52-54.
4. Anonymous (2002). Noise hurts boys and girls. *Environmental Health Perspectives*, 110(10), A569.
5. Babisch, W. (1985). Danger to health caused by environmental noise?. *Schriftenreihe des Vereins für Wasser-, Boden-und Lufthygiene*, 65, 425.
6. Babisch, W. (2000). Health effects of traffic noise. [German]. *Schriftenreihe des Vereins für Wasser-, Boden-und Lufthygiene*, 106, 178-192.
7. Babisch, W. (2004). Health aspects of extra-aural noise research. *Noise and Health*, 6(22), 69.
8. Björklid, P. (1994). Children-traffic-environment. *Architecture & Comportement*, 10(4), 361-369.
9. Bröer, C. (2007). Aircraft noise and risk politics. *Health, Risk & Society*, 9(1), 37-52. <https://doi.org/10.1080/13698570601181631>
10. Camard, J. P., Lefranc, A., Gremy, I., & Ferry, R. (2004). Noise-induced health effects: Recent epidemiological studies. *Environnement, Risques & Santé*, 3(4), 235-242.
11. Cho, H. W. & Chu, C. (2014). Sound in the air. *Osong Public Health and Research Perspectives*, 5(2): 75-76. doi: [10.1016/j.phrp.2014.04.001](https://doi.org/10.1016/j.phrp.2014.04.001)
12. Chowns, R. H., Abey-Wickrama, I., A'Brook, M. F., Gattoni, F. E. G., & Herridge, C. F. (1970). Mental-hospital admissions and aircraft noise. *The Lancet*, 295(7644), 467-468. doi: [10.1016/S0140-6736\(70\)90858-5](https://doi.org/10.1016/S0140-6736(70)90858-5)
13. Dalle, B. (1966). Troubles du comportement et vie dans les nouveaux ensembles urbains.

*L'Évolution Psychiatrique.*

14. Dora, C., & Phillips, M. (Eds.). (2000). *Transport, environment and health* (No. 89). WHO Regional Office Europe.
15. Esser, A. H. (1974). Environment and mental health. *Science, Medicine and Man*, 1(3), 181-193.
16. Evans, G. W. (2003). The built environment and mental health. *Journal of Urban Health*, 80(4), 536-555. doi:[10.1093/jurban/jtg063](https://doi.org/10.1093/jurban/jtg063)
17. Gottlob, D. & Meurers, H. (1984). Effects of road traffic noise. *Umweltpolitik* 7 (1), 41-59.
18. Haines, M., & Stansfeld, S. (2003). Ambient neighbourhood noise and children's mental health. *Occupational and Environmental Medicine*, 60(2), 146-146. doi: [10.1136/oem.60.2.146](https://doi.org/10.1136/oem.60.2.146)
19. Health Council of the Netherlands: Committee on the Health Impact of Large Airports. Public Health
20. Herridge, C. F. (1974). Aircraft noise and mental health. *Journal of Psychosomatic Research*, 18(4), 239-243. doi: [10.1016/0022-3999\(74\)90004-X](https://doi.org/10.1016/0022-3999(74)90004-X)
21. Impact of Large Airports. The Hague: Health Council of the Netherlands, 1999 (1999/14E).
22. Ising, H., Babisch, W., & Kruppa, B. (1998). Ergebnisse epidemiologischer Forschung im Bereich Lärm. In *Gesundheitsrisiken durch Lärm-Tagungsband zum Symposium Veranstaltungen im Rahmen der Initiative „Schritte zu einer nachhaltigen, umweltgerechten Entwicklung“*. Wissenschaftszentrum Bonn, 10. Februar 1998.
23. Jansen, G. (1986). Zur „erheblichen Belästigung“ und „Gefährdung“ durch Lärm. *Zeitschrift für Lärmbekämpfung*, 33, 2-7.
24. Krichagin, V. J. (1978). Health effects of noise exposure. *Journal of Sound and Vibration*, 59(1), 65-71. doi: [10.1016/0022-460X\(78\)90479-0](https://doi.org/10.1016/0022-460X(78)90479-0)
25. Kryter, K. D. (1966). Psychological reactions to aircraft noise. *Science*, 151(716), 1346-1355. doi: [10.1126/science.151.3716.1346](https://doi.org/10.1126/science.151.3716.1346)
26. Kryter, K. D. (1968). An example of "engineering psychology": The aircraft noise problem. *American Psychologist*, 23(4), 240. doi: [10.1037/h0026248](https://doi.org/10.1037/h0026248)
27. Kumar, D. (2010). Noise pollution in India. *Journal of the Indian Medical Association*, 108(3), 139.
28. McLean, E. K., & Tarnopolsky, A. (1977). Noise, discomfort and mental health: a review of the socio-medical implications of disturbance by noise. *Psychological Medicine*, 7(1), 19-62. doi: [10.1017/S0033291700023138](https://doi.org/10.1017/S0033291700023138)
29. Meyer, A. (2003). Wenn kaum noch jemand weiter weiß. Eine repräsentative sozio-psychologische Fluglärmuntersuchung als Ausweg/ When no-one knows how to continue-A representative socio-psychological aircraft noise study as a solution. *Zeitschrift für Lärmbekämpfung*, 50(5).
30. Moudon, A. V. (2009). Real noise from the urban environment: how ambient community noise affects health and what can be done about it. *American Journal of Preventive Medicine*, 37(2), 167-171. doi: [10.1016/j.amepre.2009.03.019](https://doi.org/10.1016/j.amepre.2009.03.019).
31. Murillo, I. C. (2007). How does noise affect us? In our health, life styles and environs. *Revista de enfermeria (Barcelona, Spain)*, 30(10), 13-6.
32. Kryter, K. D. & Grandjean, E. (1960): *Mensch & Umwelt. Die Wirkungen des Lärms auf den Menschen*. Verlag: J. R. Geigy, Basel
33. Ortscheid, J., & Wende, H. (2000). Fluglärmwirkungen, Umweltbundesamt.
34. Pichot, P. (1992). Noise, sleep and behavior. *Bulletin de l'Academie Nationale de Médecine*, 176(3),

- 393-9.
35. Pirrera, S., De Valck, E., & Cluydts, R. (2010). Nocturnal road traffic noise: A review on its assessment and consequences on sleep and health. *Environment International*, 36(5), 492-498. doi: 10.1016/j.envint.2010.03.007
  36. Rössli, M. (2013). Health effects of environmental noise exposure. *Therapeutische Umschau. Revue Therapeutique*, 70(12), 720-724. doi: 10.1024/0040-5930/a000470
  37. Schick, A., & Meis, M. (2001). Reducing individual noise-induced health risks with health psychology and stress coping. *Schriftenreihe des Vereins für Wasser-, Boden-und Lufthygiene*, (111), 106.
  38. Schust, M. (2004). Effects of low frequency noise up to 100 Hz. *Noise and Health*, 6(23), 73.
  39. Shepherd, M. (1975). Pollution, noise, and mental health. *The Lancet*, 305(7902), 322-324. doi: 10.1016/S0140-6736(75)91222-2
  40. Spooner, H. J. (1922). Health problems involved in noise and fatigue. *Nation's Health*, 4(91-95), 156-159
  41. Spreng, M. (2004). Noise induced nocturnal cortisol secretion and tolerable overhead flights. *Noise and Health*, 6(22), 35.
  42. Stansfeld, S. A., Haines, M. M., Burr, M., Berry, B., & Lercher, P. (2000). A review of environmental noise and mental health. *Noise and Health*, 2(8), 1.
  43. Stansfeld, S. A. & Clark, C. (2008). Noise and psychiatric disorder. In: *The impact of the Environment on Psychiatric Disorder* (Freeman, H. & Stansfeld, S. eds), Routledge, Taylor & Francis Group. London & New York
  44. Stansfeld, S., & Clark, C. (2015). Health effects of noise exposure in children. *Current Environmental Health Reports*, 2(2), 171-178. doi: 10.1007/s40572-015-0044-1
  45. Talbott, E., & Thompson, S. J. (1995). Health Effects from Environmental Noise. In: *An Introduction to Environmental Epidemiology* (Talbott, E. & Craun, G. F. eds.), Lewis Publishers. Boca Ranton, New York, London & Tokyo. 209.
  46. Tarnopolski, A. (1979). The effects of aircraft noise. *Journal of Psychosomatic Research*, 23(6), 371-372.
  47. Thompson, S. (1996). Non-auditory healthy effects of noise: updated review. *Noise Control-The Next 25 Years, Proceedings of the Internoise'96, Institute of Acoustics*, 2177-2182.
  48. Van Kamp, I., & Davies, H. (2008). Environmental noise and mental health: Five year review and future directions. In *Proceedings of the 9th International Congress on Noise as a Public Health Problem*.
  49. van Kamp, I., van Kempen, E., Baliatsas, C., & Houthuijs, D. (2013). Mental health as context rather than health outcome of noise: competing hypotheses regarding the role of sensitivity, perceived soundscapes and restoration. In *Proceedings Internoise*.
  50. Ward, W D. (1988). Jet noise and mental health. *British Journal of Audiology*, 22(2), 157-158.
  51. Yano, T., Gjestland, T., & Lee, S. (2012). Community response to noise. *Noise and Health*, 14(61), 303. doi: 10.4103/1463-1741.104898

---

**Exposure (not noise, or noise not measured or modelled) (n = 40)**

---

1. Abey-Wickrama, I., a'Brook, M. F., Gattoni, F. E. G., & Herridge, C. F. (1969). Mental-hospital admissions and aircraft noise. *The Lancet*, 294(7633), 1275-1277. doi: 10.1016/S0140-6736(69)90810-1
-



2. Chen, H., Kwong, J. C., Copes, R., Tu, K., Villeneuve, P. J., Van Donkelaar, A., ... & Wilton, A. S. (2017). Living near major roads and the incidence of dementia, Parkinson's disease, and multiple sclerosis: a population-based cohort study. *The Lancet*, 389(10070), 718-726. doi:[10.1016/S0140-6736\(16\)32399-6](https://doi.org/10.1016/S0140-6736(16)32399-6)
3. Devroey, D., Betz, W., & Coigniez, P. (2002). Influence of noise on the patients, health perception: An epidemiological registration. *Tijdschrift voor Geneeskunde*, 58(21), 1392-7.
4. Dreger, S., Meyer, N., Fromme, H., & Bolte, G. (2015). Environmental noise and incident mental health problems: A prospective cohort study among school children in Germany. *Environmental Research*, 143, 49-54. doi: [10.1016/j.envres.2015.08.003](https://doi.org/10.1016/j.envres.2015.08.003)
5. Dzhambov, A. M., Markevych, I., Tilov, B., Arabadzhiev, Z., Stoyanov, D., Gatseva, P., & Dimitrova, D. D. (2018). Pathways linking residential noise and air pollution to mental ill-health in young adults. *Environmental Research*, 166, 458-465. doi: [10.1016/j.envres.2018.06.031](https://doi.org/10.1016/j.envres.2018.06.031)
6. Firdaus, G., & Ahmad, A. (2010). Noise pollution and human health: a case study of municipal corporation of Delhi. *Indoor and Built Environment*, 19(6), 648-656. doi: [10.1177/1420326X10370532](https://doi.org/10.1177/1420326X10370532)
7. Francois, J. (1981). Effect of aircraft noise on the equilibrium of airport residents: Longitudinal study around Roissy, phase 3.
8. Fyhri, A., & Klæboe, R. (2009). Road traffic noise, sensitivity, annoyance and self-reported health—A structural equation model exercise. *Environment International*, 35(1), 91-97. doi: [10.1016/j.envint.2008.08.006](https://doi.org/10.1016/j.envint.2008.08.006)
9. Gattoni, F., & Tarnopolsky, A. (1973). Aircraft noise and psychiatric morbidity. *Psychological Medicine*, 3(4), 516-520. doi: [10.1017/S0033291700054337](https://doi.org/10.1017/S0033291700054337)
10. Gielkens C, Roberts A. Geluidshinder en de (ervaren) gezondheid: het vervolg. geluid. 2003;1:9–12.
11. Hand, D. J., Tarnopolsky, A., Barker, S. A., & Jenkins, L. M. (1980). Relationships between psychiatric hospital admissions and aircraft noise: A new study. *Proc. Int. Congr. Noise as a Public Health Problem, ASHA Rep*, 10, 277-282.
12. Hardoy, M. C., Carta, M. G., Marci, A. R., Carbone, F., Cadeddu, M., Kovess, V., ... & Carpiello, B. (2005). Exposure to aircraft noise and risk of psychiatric disorders: the Elmas survey. *Social Psychiatry and Psychiatric Epidemiology*, 40(1), 24-26. doi:[10.1007/s00127-005-0837-x](https://doi.org/10.1007/s00127-005-0837-x)
13. Hatfield, J., Job, R. F. S., Carter, N. L., Peploe, P., Taylor, R., & Morrell, S. (2001). The influence of psychological factors on self-reported physiological effects of noise. *Noise and Health*, 3(10), 1.
14. Hatfield, J., Job, R. S., Hede, A. J., Carter, N. L., Peploe, P., Taylor, R., & Morrell, S. (2002). Human response to environmental noise: the role of perceived control. *International Journal of Behavioral Medicine*, 9(4), 341-359. doi: [10.1207/S15327558IJBMO904\\_04](https://doi.org/10.1207/S15327558IJBMO904_04)
15. Hattori, M. (2000). A field study of health effects of aircraft noise in adults around Komatsu Air Base (1998). [*Nihon koshu eisei zasshi*] *Japanese Journal of Public Health*, 47(1), 20-31.
16. Herridge, C. F. (1972). Aircraft noise and mental hospital admission. *British Journal of Audiology*, 6(2), 32-36. doi: [10.3109/00381797209075555](https://doi.org/10.3109/00381797209075555)
17. Jenkins, L. M., Tarnopolsky, A., Hand, D. J., & Barker, S. M. (1979). Comparison of three studies of aircraft noise and psychiatric hospital admissions conducted in the same area. *Psychological Medicine*, 9(4), 681-693. doi: [10.1017/S0033291700033997](https://doi.org/10.1017/S0033291700033997)

- 
18. Jenkins, L., Tarnopolsky, A., & Hand, D. (1981). Psychiatric admissions and aircraft noise from London Airport: four-year, three-hospitals' study. *Psychological Medicine*, 11(4), 765-782. doi: 10.1017/S0033291700041271
- 
19. Jensen, H. A., Rasmussen, B., & Ekholm, O. (2018). Neighbour and traffic noise annoyance: a nationwide study of associated mental health and perceived stress. *European Journal of Public Health*, 28(6), 1050-1055. doi: 10.1093/eurpub/cky091.
- 
20. Kishikawa, H., Matsui, T., Uchiyama, I., Miyakawa, M., Hiramatsu, K., & Stansfeld, S. A. (2009). Noise sensitivity and subjective health: Questionnaire study conducted along trunk roads in Kusatsu, Japan. *Noise and Health*, 11(43), 111. doi: 10.4103/1463-1741.50696
- 
21. Knipschild, P. (1977). V. Medical effects of aircraft noise: community cardiovascular survey. *International Archives of Occupational and Environmental Health*, 40(3), 185-190. doi: [10.1007/BF01842081](https://doi.org/10.1007/BF01842081)
- 
22. Knipschild, P. (1977). VI. Medical effects of aircraft noise: general practice survey. *International Archives of Occupational and Environmental Health*, 40(3), 191-196. doi: [10.1007/BF01842082](https://doi.org/10.1007/BF01842082)
- 
23. Knipschild, P., & Oudshoorn, N. (1977). VII. Medical effects of aircraft noise: drug survey. *International Archives of Occupational and Environmental Health*, 40(3), 197-200. doi: [10.1007/BF01842083](https://doi.org/10.1007/BF01842083)
- 
24. Koszarny, Z., Szata, W., & Goryński, P. (1982). Comparative evaluation of indicators of street noise with reference to the effect on the Warsaw's population. *Roczniki Państwowego Zakładu Higieny*, 33(5-6), 469-481.
- 
25. Koszarny, Z. (2000). The effect of intensive traffic noise on well-being and self-assessed health status of urban population. *Roczniki Państwowego Zakładu Higieny*, 51(2), 191-201.
- 
26. Kryter, K. D. (1990). Aircraft noise and social factors in psychiatric hospital admission rates: a re-examination of some data. *Psychological Medicine*, 20(2), 395-411. doi: [10.1017/S0033291700017712](https://doi.org/10.1017/S0033291700017712)
- 
27. Kryter, K. D. (1990). "Aircraft noise and social factors in psychiatric hospital admission rates: A re-examination of some data": Erratum.
- 
28. Lee, K. W., Kim, S. J., Park, J. B., Min, K. B., Kil, H. G., Lee, C., & Lee, K. J. (2011). Relationship Between Aircraft Noise Exposure and Depression, Anxiety, Stress in Korea. *Epidemiology*, 22(1), S258.
- 
29. Miyakawa, M., Matsui, T., Uchiyama, I., Hiramatsu, K., Hayashi, N., Morita, I., ... & Ohashi, S. (2008). Relationship between subjective health and disturbances of daily life due to aircraft noise exposure—Questionnaire study conducted around Narita International Airport—. In *Proc. 9th International conference on Noise as a Public Health Problem* (pp. 314-321).
- 
30. Niemann, H., Maschke, C., & Hecht, K. (2005). Noise induced annoyance and morbidity. Results from the pan European LARES-survey. *Bundesgesundheitsblatt, Gesundheitsforschung, Gesundheitsschutz*, 48(3), 315-328. doi: 10.4103/1463-1741.33537
- 
31. Niemann, H., Bonnefoy, X., Braubach, M., Hecht, K., Maschke, C., Rodrigues, C., & Robbel, N. (2006). Noise-induced annoyance and morbidity results from the pan-European LARES study. *Noise and Health*, 8(31), 63. doi: 10.4103/1463-1741.33537
- 
32. Pisani, S., Bonarrigo, D., Gambino, M., Macchi, L., Banfi, F., Verri, A. M., ... & Cortinovis, I. (2003). Salus domestica epidemiological study: evaluation of health harm in a sample of women living close to Malpensa 2000 Airport. *EPIDEMIOLOGIA E PREVENZIONE*, (4),
-

---

234-241.

---

33. Putrik, P., de Vries, N. K., Mujakovic, S., van Amelsvoort, L., Kant, I., Kunst, A. E., ... & Jansen, M. (2015). Living environment matters: relationships between neighborhood characteristics and health of the residents in a Dutch municipality. *Journal of Community Health, 40*(1), 47-56. doi: 10.1007/s10900-014-9894-y

---

34. Ristovska, G., Gjorgjev, D., & Jordanova, N. P. (2004). Psychosocial effects of community noise: cross sectional study of school children in urban center of Skopje, Macedonia. *Croatian Medical Journal, 45*(4), 473-476.

---

35. Tarnopolsky, A., Barker, S. M., Wiggins, R. D., & McLean, E. K. (1978). The effect of aircraft noise on the mental health of a community sample: a pilot study. *Psychological Medicine, 8*(2), 219-233. doi: 10.1017/S0033291700014276

---

36. Tarnopolsky, A., Watkins, G., & Hand, D. J. (1980). Aircraft noise and mental health: I. Prevalence of individual symptoms. *Psychological Medicine, 10*(4), 683-698. doi: 10.1017/S0033291700054982

---

37. Tarnopolsky, A., Morton-Williams, J., & Barker, S. M. (1980). *Aircraft noise and prevalence of psychiatric disorders*. Social & Community Planning Research.

---

38. Turnovska, T., Staykova, J., & Petkov, T. (2004). Health assessment of populations living close to the airport of Bourgas, Bulgaria. *Arhiv za Higijenu rada i Toksikologiju, 55*(1), 5-10.

---

39. Watkins, G., Tarnopolsky, A., & Jenkins, L. M. (1981). Aircraft noise and mental health: II. Use of medicines and health care services. *Psychological Medicine, 11*(1), 155-168 doi: 10.1017/S003329170005337X.

---

40. Weigl, K., Herr, C. E., Meyer, N., Otto, C., Stilianakis, N., Bolte, G., ... & Kolb, S. (2018). Predictors of Health-related Quality of Life in Bavarian Preschool Children. *Gesundheitswesen, 80* (S 01): S1-S4. doi: 10.1055/s-0042-104117

---

#### Unrelated research topic (n = 12)

---

1. Agaeva, M. (2010). Precedence effect for moving sound. *International Journal of Psychophysiology, 77*(3), 302. doi: 10.1016/j.ijpsycho.2010.06.195
2. Baliatsas, C., van Kamp, I., Swart, W., Hooiveld, M., & Yzermans, J. (2016). Noise sensitivity: Symptoms, health status, illness behavior and co-occurring environmental sensitivities. *Environmental Research, 150*, 8-13. doi: 10.1016/j.envres.2016.05.029
3. Cantrell, R. W. (1974). Prolonged exposure to intermittent noise: audiometric, biochemical, motor, psychological and sleep effects. *The Laryngoscope, 84* (10 Pt 2 Suppl 1), 1.
4. Favre, B. (1985). Relationship between traffic noise and effect in people; development of an exposure model. *Rev Acoust. 18*(74), 409-421.
5. Favre, B. (1985). Relationship between traffic noise and effect in people; application to a typical urban environment. *Rev Acoust. 18*(74), 423-438.
6. Hayashi, C., Hayashi, F., Kodama, H., & Kondo, S. (1973). Construction of PAANI (Psychological Assessment of Aircraft Noise Index) using statistical and psychological ideas. *Proceedings of the Institute of Statistical Mathematics, 1*(21).
7. Kryter, K. D. (2007). Acoustical, sensory, and psychological research data and procedures for their use in predicting effects of environmental noises. *The Journal of the Acoustical Society of America, 122*(5), 2601-2614. doi: 10.1121/1.2782748
8. Lercher, P., Schmitzberger, R., & Kofler, W. (1995). Perceived traffic air pollution, associated



- behavior and health in an alpine area. *Science of the Total Environment*, 169(1-3), 71-74. [doi: 10.1016/0048-9697\(95\)04634-D](https://doi.org/10.1016/0048-9697(95)04634-D)
9. Stansfeld, S. A., Clark, C. R., Jenkins, L. M., & Tarnopolsky, A. (1985). Sensitivity to noise in a community sample: I. Measurement of psychiatric disorder and personality. *Psychological Medicine*, 15(2), 243-254. [doi: 10.1017/S0033291700023527](https://doi.org/10.1017/S0033291700023527)
  10. Stansfeld, S. A., Gallacher, J. E. J., Sharp, D. S., & Yarnell, J. W. G. (1991). Social factors and minor psychiatric disorder in middle-aged men: a validation study and a population survey. *Psychological Medicine*, 21(1), 157-167. doi: 10.1017/S0033291700014744
  11. Stansfeld, S. A. (1992). Noise, noise sensitivity and psychiatric disorder: epidemiological and psychophysiological studies. *Psychological Medicine Monograph Supplement*, 22, 1-44. [doi: 10.1017/S0264180100001119](https://doi.org/10.1017/S0264180100001119)
  12. Wunderli, J. M., Pieren, R., Habermacher, M., Vienneau, D., Cajochen, C., Probst-Hensch, N., ... & Brink, M. (2016). Intermittency ratio: A metric reflecting short-term temporal variations of transportation noise exposure. *Journal of Exposure Science and Environmental Epidemiology*, 26(6), 575. doi:10.1038/jes.2015.5

---

#### Full-Text could not be obtained (n = 9)

---

1. Albertini, C. (1931). La lotta contro i rumori ei rumori della strada. *Vita Italiana*
2. Guthof, O., & Gableske, R. (1968). Effects of traffic noise on human life. *Das Öffentliche Gesundheitswesen*, 30(1), 1-6.
3. Haider, M. (1976). Air pollution, noise-current environmental problems. *Wiener Medizinische Wochenschrift (1946)*, 126(6), 65.
4. Ising, H. & Rebentisch, E. (1992). Environmental noise: Exposure, annoyance and long-term effects on health. [German]. *Wissenschaft und Umwelt*, (2), 147-150.
5. Kelly, A. (1986). Effects of aircraft noise and noise sensitivity on the physical and mental well-being of older adults. Keine weiteren Angaben vorhanden.
6. Lohman, A. (2007). The impact of a freeway on neighborhood: Sense of community, size, and methods of measurement. Dissertation. The Claremont Graduate University. AAI3233758.
7. Schick, A. (1992): The psychological aspects of noise research. *Zeitschrift für Lärmbekämpfung*, 39 (4) 113-117.
8. Vartiainen, A.-K., Turunen, A. W., Ung-Lanki, S. & Lanki, T. (2015). Meluherkkyydellä on tärkeä rooli melun kokemisessa. *Psykologia*, 50(4), 244-256.
9. Yamamoto, K. (1993). Living environment stress and mental health--From the ten years' study of psychosocial stress in inhabitants along the loop road 7 in Metropolitan Tokyo. *Journal of Mental Health*, 39, 41-54.

---

#### Screening instrument was not validated (n = 6)

---

1. Belojević, G., Jakovljević, B., & Aleksić, O. (1997). Subjective reactions to traffic noise with regard to some personality traits. *Environment International*, 23(2), 221-226. [doi: 10.1016/S0160-4120\(97\)00008-1](https://doi.org/10.1016/S0160-4120(97)00008-1)
2. Öhrström, E. (1989). Sleep disturbance, psycho-social and medical symptoms—a pilot survey among persons exposed to high levels of road traffic noise. *Journal of Sound and Vibration*, 133(1), 117- [doi: 10.1016/0022-460X\(89\)90986-3](https://doi.org/10.1016/0022-460X(89)90986-3)
3. Öhrström, E. (1991). Psycho-social effects of traffic noise exposure. *Journal of Sound and Vibration*, 151(3), 513-517. [doi: 10.1016/0022-460X\(91\)90551-T](https://doi.org/10.1016/0022-460X(91)90551-T)

4. Öhrström, E., & Skånberg, A. (2000). Adverse health effects in relation to noise mitigation – A longitudinal study in the city of Göteborg. In *Proceedings of the 29th International Congress and Exhibition on Noise Control Engineering, Nice, France* (pp. 27-30).
5. Öhrström, E. (2004). Longitudinal surveys on effects of changes in road traffic noise—annoyance, activity disturbances, and psycho-social well-being. *The Journal of the Acoustical Society of America*, 115(2), 719-729. doi: [10.1121/1.1639333](https://doi.org/10.1121/1.1639333)
6. Yoshida, T., Osada, Y., Kawaguchi, T., Hoshiyama, Y., Yoshida, K., & Yamamoto, K. (1997). Effects of road traffic noise on inhabitants of Tokyo. *Journal of Sound and Vibration*, 205(4), 517-522. doi: [10.1006/jsvi.1997.1020](https://doi.org/10.1006/jsvi.1997.1020)

---

#### Industry-/ Military Aircraft Noise (n = 4)

---

1. Hiramatsu, K., Yamamoto, T., Taira, K., Ito, A., & Nakasone, T. (1997). A survey on health effects due to aircraft noise on residents living around Kadena air base in the Ryukyus. *Journal of Sound and Vibration*, 205(4), 451-460. doi: [10.1006/jsvi.1997.1011](https://doi.org/10.1006/jsvi.1997.1011)
2. Hiramatsu, K., Matsui, T., Miyakita, T., Ito, A., Tokuyama, T., Osada, Y., & Yamamoto, T. (2002). Population-based questionnaire survey on health effects of aircraft noise on residents living around US airfields in the Ryukyus—Part II: An analysis of the discriminant score and the factor score. *Journal of Sound and Vibration*, 250(1), 139-144. doi: [10.1006/jsvi.2001.3896](https://doi.org/10.1006/jsvi.2001.3896)
3. Matsui, T. (2013, September). Psychosomatic disorder due to aircraft noise and its causal pathway. In *INTER-NOISE and NOISE-CON Congress and Conference Proceedings*, 247(8), 605-609. Institute of Noise Control Engineering.
4. Stošić, L., & Blagojević, L. (2011). Environmental noise and mental disturbances in urban population. *Acta Medica Medianae*, 50(3), 34-39. doi: [10.5633/amm.2011.0306](https://doi.org/10.5633/amm.2011.0306)

---

#### Population of employees considered (not general population) (n = 3)

---

1. Akan, Z., Yilmaz, A., Özdemir, O., & Korpınar, M. A. (2012). Noise pollution, psychiatric symptoms and quality of life: noise problem in the east region of Turkey. *Journal of Inonu University Medical Faculty*, 19(2), 75-81. doi: [10.7247/jiumf.19.2.3](https://doi.org/10.7247/jiumf.19.2.3)
2. Calapaj, G. G., & Bellia, G. (1969). Psychometric studies of subjects exposed to the noise of jet engines. *La Medicina del Lavoro*, 60(1), 43.
3. Chioyenda, P., Pasqualetti, P., Zappasodi, F., Ercolani, M., Milazzo, D., Tomei, G., ... & Tecchio, F. (2007). Environmental noise-exposed workers: Event-related potentials, neuropsychological and mood assessment. *International Journal of Psychophysiology*, 65(3), 228-237. doi: [10.1016/j.ijpsycho.2007.04.009](https://doi.org/10.1016/j.ijpsycho.2007.04.009)

---

#### Experimental study design (n = 3)

---

1. Naqvi, F., Haider, S., Perveen, T., & Haleem, D. J. (2012). Sub-chronic exposure to noise affects locomotor activity and produces anxiogenic and depressive like behavior in rats. *Pharmacological Reports*, 64(1), 64-69. doi: [10.1016/S1734-1140\(12\)70731-4](https://doi.org/10.1016/S1734-1140(12)70731-4)
2. Granati, A., Angeleri, F., Lenzi, R. (1959). L'influenza dei rumori sul sistema nervoso – *Folia Medica*: XLII (11): 1314-1325.
3. Schönpflug, W., Kausche, J. & Wieland, R. (1978). Traffic noise during leisure time. [German]. *Kampf dem Lärm*, 25(1): 21-25.

---

#### Results not usable (see reference for more details) (n = 3)

---

1. Bodin, T., Albin, M., & Bjork, J. (2013). Road traffic noise and mental health-Preliminary results from a cross-sectional study in southern Sweden. In *INTER-NOISE and NOISE-CON Congress*

---

and Conference Proceedings, 247(2), 5768-5772. Institute of Noise Control Engineering.

Only descriptive results depicted without numbers;

Author did not respond to requests for more information

2. Greiser, E., Greiser, C., & Janhsen, K. (2007). Night-time aircraft noise increases prevalence of prescriptions of antihypertensive and cardiovascular drugs irrespective of social class—the Cologne-Bonn Airport study. *Journal of Public Health, 15*(5), 327-337. doi: 10.1007/s10389-007-0137-x

Anxiolytics were evaluated together with blood pressure and heart medications

3. Houthuijs, D. J. M. & van Wiechen, C. M. A. G. (2006). Monitoring van gezondheid en beleving rondom de luchthaven Schiphol. RIVM rapport 630100003/2006

Author did not respond to requests for more information

---

#### Convenience Sample (n = 2)

---

1. Dzhambov, A., Tilov, B., Markevych, I., & Dimitrova, D. (2017). Residential road traffic noise and general mental health in youth: the role of noise annoyance, neighborhood restorative quality, physical activity, and social cohesion as potential mediators. *Environment International, 109*, 1-9. doi: 10.1016/j.envint.2017.09.009.
  2. Maschke, C., & Hecht, K. (2005). Tag-Nacht Unterschiede in der multifaktoriellen Genese von lärminduzierten Erkrankungen—Ergebnisse einer epidemiologischen Studie. *Somnologie, 9*(2), 96-104. doi: 10.1111/j.1439-054X.2005.00046.x
- 

#### Repeat publication (n = 1)

---

1. Greiser, E., & Glaeske, G. (2013). Social and economic consequences of night-time aircraft noise in the vicinity of Frankfurt/Main airport. *Gesundheitswesen (Bundesverband der Ärzte des Öffentlichen Gesundheitsdienstes (Germany)), 75*(3), 127-133.
- 

#### Outcome not differentiated (n = 1)

---

1. Wright, D. M., Newell, K., Maguire, A., & O'Reilly, D. (2018). Aircraft noise and self-assessed mental health around a regional urban airport: a population based record linkage study. *Environmental Health, 17*(1), 74. doi: 10.1186/s12940-018-0418-6.
-

### 3. Leave-one-out Analysis

**Table 3.** Leave-one-out analysis for depression and exposure to road traffic noise.

| Study Omitted        | ES   | 95% CI |      |
|----------------------|------|--------|------|
| Floud 2011           | 1.03 | 0.99   | 1.07 |
| Halonen 2013         | 1.03 | 0.99   | 1.07 |
| Klompaker 2019       | 1.04 | 1.00   | 1.07 |
| Leijssen 2019        | 1.03 | 0.99   | 1.07 |
| Okokon               | 1.02 | 0.99   | 1.06 |
| Orban 2016           | 1.02 | 0.99   | 1.05 |
| Seidler 2017         | 1.02 | 0.98   | 1.07 |
| Stansfeld 1993, 1996 | 1.02 | 0.99   | 1.06 |
| Sygna 2014           | 1.03 | 0.99   | 1.06 |
| Tzivian 2018         | 1.02 | 0.99   | 1.06 |
| Zock 2018            | 1.03 | 0.99   | 1.06 |

ES Effect estimate, CI confidence interval.

**Table 4.** Leave-one-out analysis for depression and exposure to aircraft noise.

| Study Omitted     | ES   | 95% CI |      |
|-------------------|------|--------|------|
| Baudin 2018       | 1.14 | 1.12   | 1.15 |
| Floud 2011        | 1.14 | 1.12   | 1.16 |
| Schreckenber 2009 | 1.14 | 1.12   | 1.15 |
| Seidler 2017      | 1.06 | 0.95   | 1.19 |
| Van Kamp 2007     | 1.14 | 1.12   | 1.15 |

ES Effect estimate, CI confidence interval.

**Table 5.** Leave-one-out analysis for anxiety and exposure to road traffic noise.

| Study Omitted  | ES   | 95% CI |      |
|----------------|------|--------|------|
| Bocquier 2014  | 1.07 | 1.01   | 1.13 |
| Floud 2011     | 1.02 | 0.98   | 1.07 |
| Halonen 2013   | 1.03 | 0.99   | 1.07 |
| Klompaker 2019 | 1.00 | 0.98   | 1.02 |
| Okokon 2018    | 1.02 | 0.98   | 1.06 |
| Zock 2018      | 1.02 | 0.98   | 1.07 |

ES Effect estimate, CI confidence interval.

4. Publication Bias

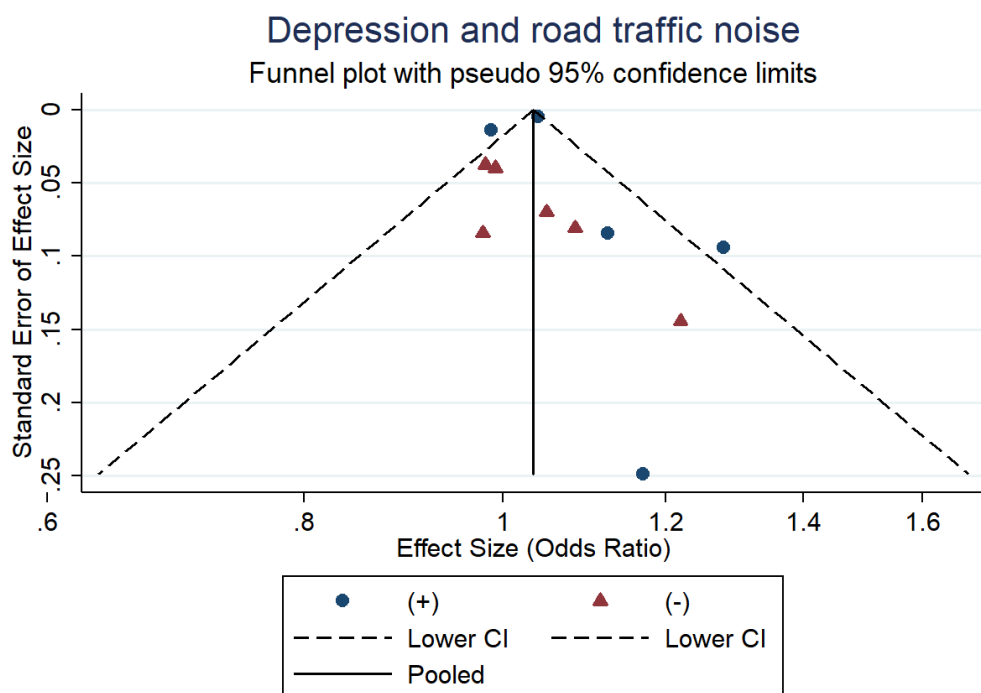

**Figure 1.** Funnel plot for depression (based on anti-depressant use, depressive episodes diagnoses, detected with validated a screening instrument) and road traffic noise.

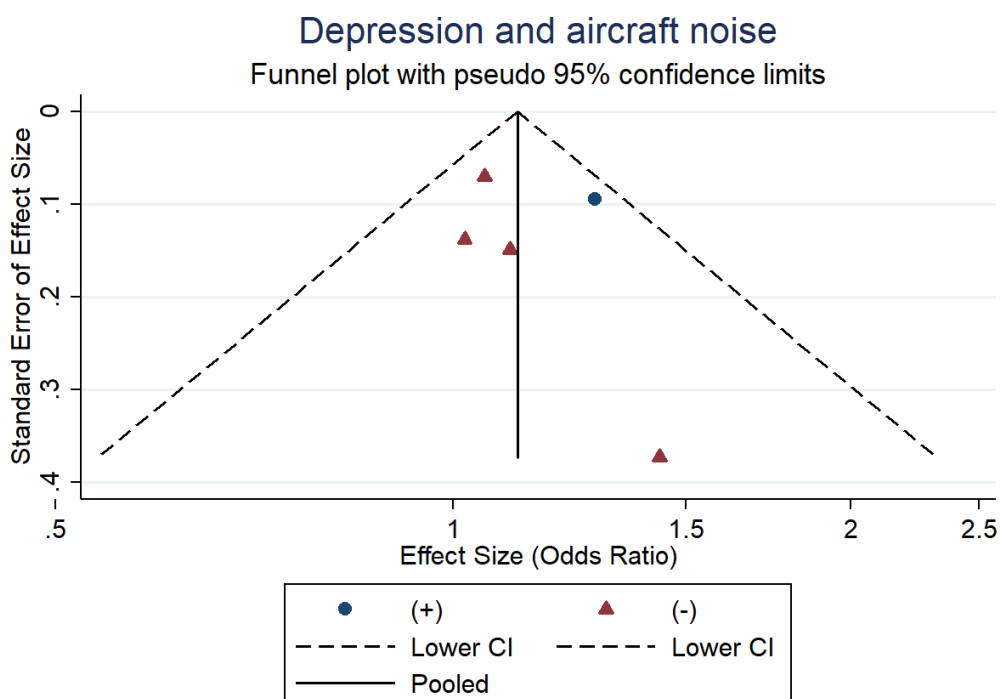

**Figure 2.** Funnel plot for depression (based on anti-depressant use, depressive episodes diagnoses, detected with validated a screening instrument) and aircraft noise.

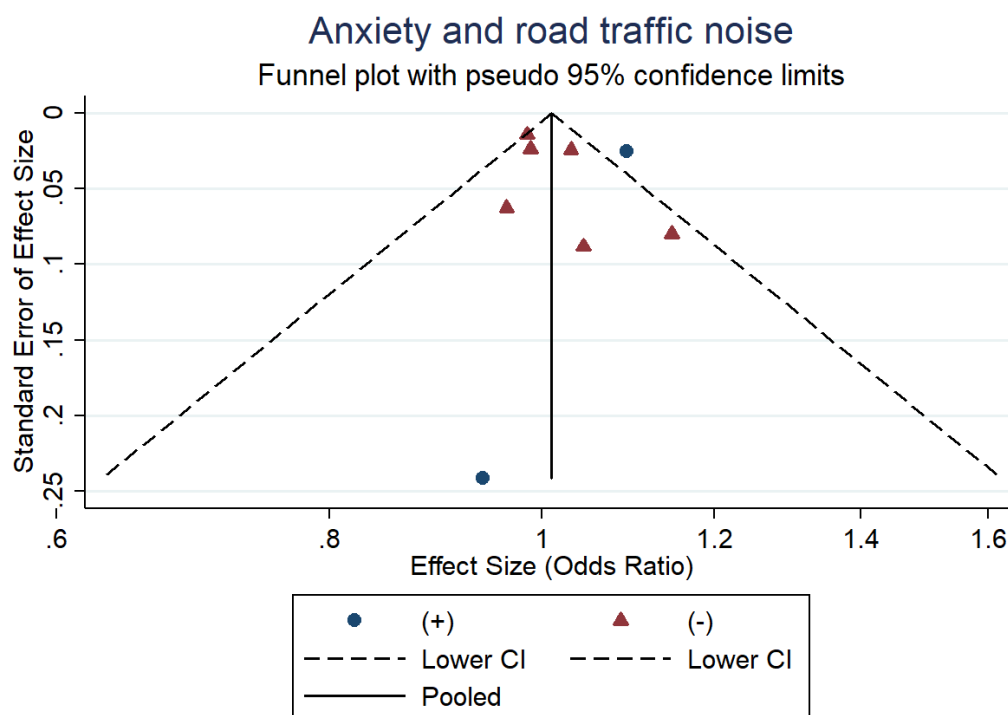

**Figure 3.** Funnel plot for anxiety (based on anxiolytics use, diagnoses, detected with validated a screening instrument) and road traffic noise.
